# Supplementary material for: Nucleolar Protein 56 Deficiency in Zebrafish Leads to Developmental Abnormalities and Anemia via p53 and JAK2-STAT3 Signaling
Source: MDPI journal article supplement (doi:10.3390/biology12040538), 2023-03-31
Supplement: s1 [file s1]

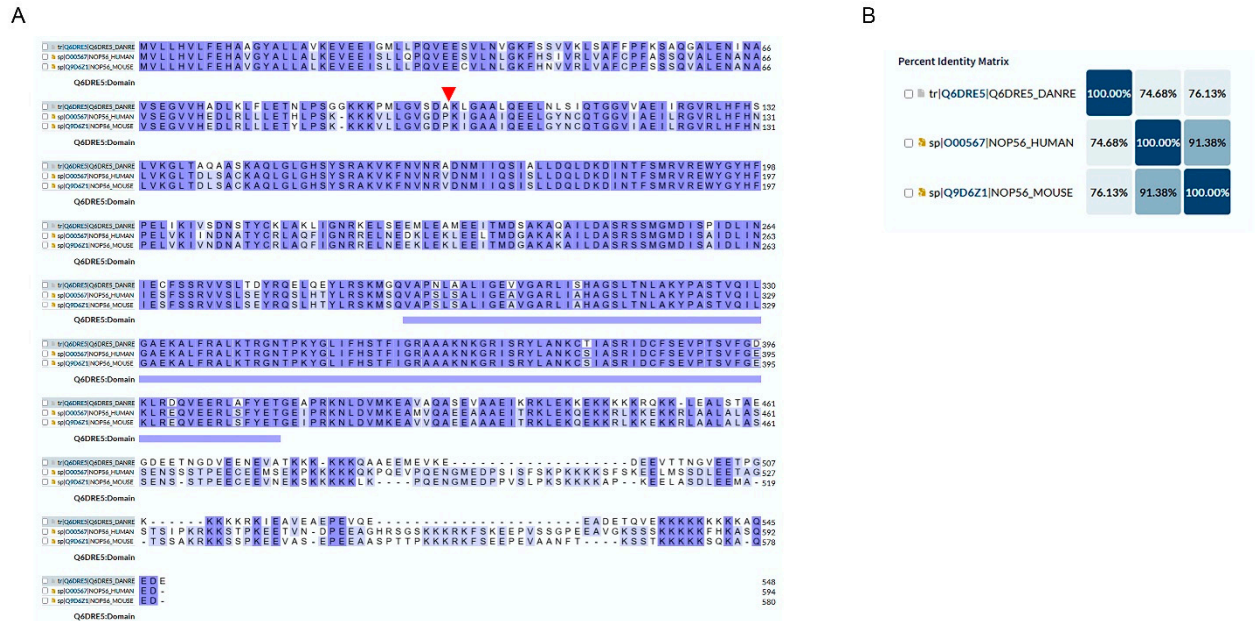

**Figure S1.** The amino acid identity of nop56 between human, mouse and zebrafish. (A), The alignment result of amino acid sequence of nop56 in human, mouse and zebrafish. Arrowhead represents the target site. (B), the percent identity matrix of nop56 between human, mouse and zebrafish.

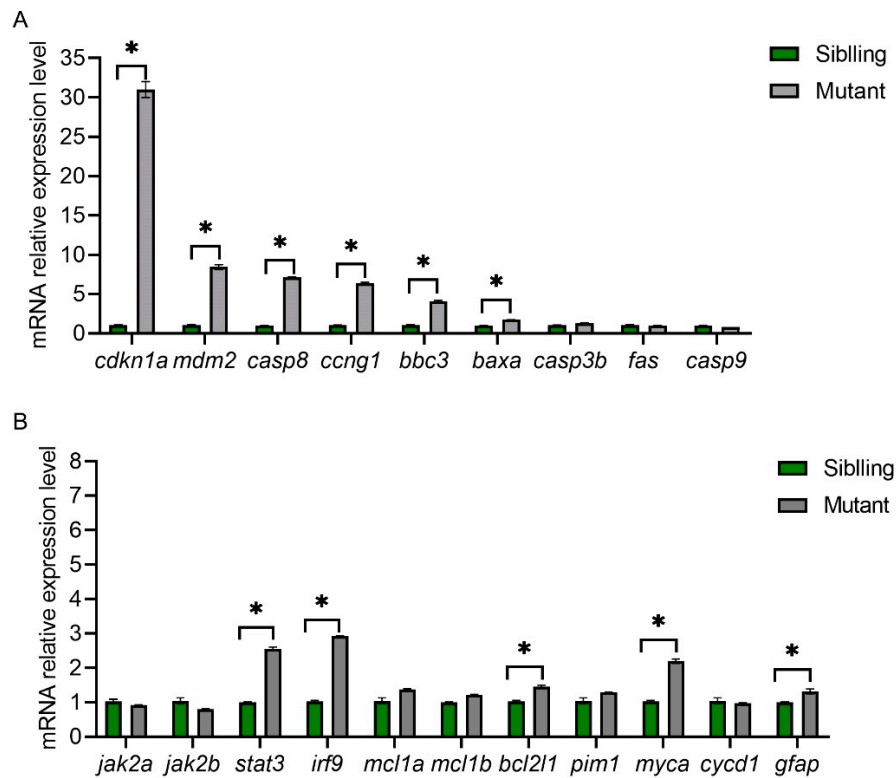

**Figure S2.** qRT-PCR analysis of *p53* related genes (A), and *stat3* related genes (B) transcript levels of siblings and mutants at 48 hpf.  $n = 3$ ,  $* < 0.05$ .
