# Supplementary material for: Nucleolar Protein 56 Deficiency in Zebrafish Leads to Developmental Abnormalities and Anemia via p53 and JAK2-STAT3 Signaling
Source: Biology (Basel). 2023 Mar 31;12(4):538. doi: 10.3390/biology12040538 (PMC10136036; doi:10.3390/biology12040538)
Supplement: Supplementary file 1 [file biology-12-00538-s001.zip › Supplementary Materials Table S1.xls]

Table S1. Summary of RNA-Seq data for each sample.
id	sib_count	mut_count	sib_fpkm	mut_fpkm	log2(FC)	Pvalue	FDR	significant	Symbol	Description	KEGG_A_class	KEGG_B_class	Pathway	K_ID	GO Component	GO Function	GO Process
ENSDARG00000000001	28	31.57	1.305	1.46	0.161918562	0.679241159	0.874732759	no	slc35a5	solute carrier family 35, member A5 [Source:ZFIN;Acc:ZDB-GENE-030616-55]	-	-	-	-	GO:0005794//Golgi apparatus;GO:0005622//intracellular;GO:0043227//membrane-bounded organelle;GO:0043226//organelle;GO:0012505//endomembrane system;GO:0005737//cytoplasm;GO:0044424//intracellular part;GO:0005623//cell;GO:0044444//cytoplasmic part;GO:0043229//intracellular organelle;GO:0043231//intracellular membrane-bounded organelle;GO:0005575//cellular_component;GO:0044464//cell part	GO:0005215//transporter activity;GO:0003674//molecular_function;GO:0022857//transmembrane transporter activity	GO:0009987//cellular process;GO:0044699//single-organism process;GO:0006810//transport;GO:0055085//transmembrane transport;GO:0051234//establishment of localization;GO:0051179//localization;GO:0044763//single-organism cellular process;GO:1902578//single-organism localization;GO:0008150//biological_process;GO:0044765//single-organism transport
ENSDARG00000000002	92	267.93	4.09	11.86	1.535931262	3.07E-11	1.23E-09	yes	ccdc80	coiled-coil domain containing 80 [Source:ZFIN;Acc:ZDB-GENE-030616-56]	-	-	-	-	GO:0005578//proteinaceous extracellular matrix;GO:0031012//extracellular matrix;GO:0005575//cellular_component;GO:0044421//extracellular region part;GO:0005576//extracellular region	-	GO:0007275//multicellular organism development;GO:0008150//biological_process;GO:0044767//single-organism developmental process;GO:0009653//anatomical structure morphogenesis;GO:0044699//single-organism process;GO:0048856//anatomical structure development;GO:0032502//developmental process;GO:0032501//multicellular organismal process;GO:0048646//anatomical structure formation involved in morphogen…
ENSDARG00000000018	614.5	362.5	23.985	14.095	-0.766948962	3.78E-05	0.00042755	no	nrf1	nuclear respiratory factor 1 [Source:ZFIN;Acc:ZDB-GENE-001221-1]	-	-	-	-	GO:0005634//nucleus;GO:0043231//intracellular membrane-bounded organelle;GO:0005575//cellular_component;GO:0005623//cell;GO:0043226//organelle;GO:0044424//intracellular part;GO:0044464//cell part;GO:0043229//intracellular organelle;GO:0005622//intracellular;GO:0043227//membrane-bounded organelle	GO:0097159//organic cyclic compound binding;GO:1901363//heterocyclic compound binding;GO:0005488//binding;GO:0003676//nucleic acid binding;GO:0003677//DNA binding;GO:0003674//molecular_function	GO:0008152//metabolic process;GO:0065007//biological regulation;GO:0065008//regulation of biological quality;GO:0034641//cellular nitrogen compound metabolic process;GO:0032502//developmental process;GO:0006950//response to stress;GO:0009058//biosynthetic process;GO:0042592//homeostatic process;GO:0009987//cellular process;GO:0044237//cellular metabolic process;GO:0050896//response to stimulus;GO…
ENSDARG00000000019	613.5	754.5	25.7	31.395	0.288766453	0.098631838	0.253484266	no	ube2h	ubiquitin-conjugating enzyme E2H (UBC8 homolog, yeast) [Source:ZFIN;Acc:ZDB-GENE-030616-67]	Genetic Information Processing	Folding, sorting and degradation	ko04120//Ubiquitin mediated proteolysis	K10576	GO:0044424//intracellular part;GO:0005575//cellular_component;GO:0005737//cytoplasm;GO:0044464//cell part;GO:0005622//intracellular;GO:0005623//cell	GO:0043167//ion binding;GO:0005488//binding;GO:0003674//molecular_function;GO:0005515//protein binding;GO:0019899//enzyme binding	GO:0043170//macromolecule metabolic process;GO:0044267//cellular protein metabolic process;GO:0009056//catabolic process;GO:0044238//primary metabolic process;GO:0019538//protein metabolic process;GO:0008150//biological_process;GO:0043412//macromolecule modification;GO:0044237//cellular metabolic process;GO:0036211//protein modification process;GO:0044260//cellular macromolecule metabolic process…
ENSDARG00000000068	99.5	169	5.655	9.49	0.746881063	0.001603743	0.010359766	no	slc9a3r1a	solute carrier family 9, subfamily A (NHE3, cation proton antiporter 3), member 3 regulator 1a [Source:ZFIN;Acc:ZDB-GENE-031006-7]	-	-	-	-	GO:0016020//membrane;GO:0005622//intracellular;GO:0044464//cell part;GO:0005623//cell;GO:0005575//cellular_component;GO:0071944//cell periphery;GO:0005886//plasma membrane	GO:0005198//structural molecule activity;GO:0003674//molecular_function	GO:1902582//single-organism intracellular transport;GO:0045184//establishment of protein localization;GO:0008150//biological_process;GO:0070727//cellular macromolecule localization;GO:0034613//cellular protein localization;GO:0051649//establishment of localization in cell;GO:0006810//transport;GO:0008104//protein localization;GO:0032502//developmental process;GO:0044765//single-organism transport…
ENSDARG00000000069	814	852	50.63	52.61	0.055344566	0.758033425	0.929613946	no	dap	death-associated protein [Source:ZFIN;Acc:ZDB-GENE-000511-3]	-	-	-	-	-	GO:0003674//molecular_function	GO:0008150//biological_process;GO:0023052//signaling;GO:0007154//cell communication;GO:0006914//autophagy;GO:0050794//regulation of cellular process;GO:0044763//single-organism cellular process;GO:0044700//single organism signaling;GO:0009987//cellular process;GO:0007165//signal transduction;GO:0008219//cell death;GO:0016265//death;GO:0065007//biological regulation;GO:0006950//response to stress;…
ENSDARG00000000086	697	619	14.175	12.505	-0.180843678	0.303907068	0.54269964	no	itsn1	intersectin 1 (SH3 domain protein) [Source:ZFIN;Acc:ZDB-GENE-030616-226]	-	-	-	-	GO:0005575//cellular_component;GO:0005623//cell;GO:0005622//intracellular;GO:0044464//cell part	GO:0003674//molecular_function;GO:0019899//enzyme binding;GO:0005488//binding;GO:0043167//ion binding;GO:0005515//protein binding	GO:0050896//response to stimulus;GO:0023052//signaling;GO:0050794//regulation of cellular process;GO:0007154//cell communication;GO:0044700//single organism signaling;GO:0051716//cellular response to stimulus;GO:0007165//signal transduction;GO:0050789//regulation of biological process;GO:0044763//single-organism cellular process;GO:0065007//biological regulation;GO:0008150//biological_process;GO:…
ENSDARG00000000103	3703.5	3713.155	61.51	62.045	0.012493977	0.969801778	1	no	myh10	myosin, heavy chain 10, non-muscle [Source:ZFIN;Acc:ZDB-GENE-030616-162]	Cellular Processes	Cellular commiunity	ko04530//Tight junction	K10352	GO:0044464//cell part;GO:0043226//organelle;GO:0032991//macromolecular complex;GO:0005575//cellular_component;GO:0043234//protein complex;GO:0005856//cytoskeleton;GO:0043228//non-membrane-bounded organelle;GO:0044424//intracellular part;GO:0005622//intracellular;GO:0043229//intracellular organelle;GO:0005623//cell;GO:0043232//intracellular non-membrane-bounded organelle	GO:0003674//molecular_function;GO:0005515//protein binding;GO:0043167//ion binding;GO:0008092//cytoskeletal protein binding;GO:0005488//binding	GO:0048856//anatomical structure development;GO:0044707//single-multicellular organism process;GO:0044763//single-organism cellular process;GO:0071840//cellular component organization or biogenesis;GO:0009987//cellular process;GO:0007275//multicellular organism development;GO:0032501//multicellular organismal process;GO:0006996//organelle organization;GO:0032502//developmental process;GO:0009790/…
ENSDARG00000000142	64.5	41	6.595	4.18	-0.657869717	0.023147429	0.087168515	no	tmem267	transmembrane protein 267 [Source:ZFIN;Acc:ZDB-GENE-030616-546]	-	-	-	-	GO:0005575//cellular_component	-	-
ENSDARG00000000151	33	54	1.91	3.435	0.846737461	0.042987126	0.138565389	no	thraa	thyroid hormone receptor alpha a [Source:ZFIN;Acc:ZDB-GENE-990415-263]	Environmental Information Processing	Signaling molecules and interaction	ko04080//Neuroactive ligand-receptor interaction	K05547	GO:0005623//cell;GO:0005575//cellular_component;GO:0043231//intracellular membrane-bounded organelle;GO:0043227//membrane-bounded organelle;GO:0044464//cell part;GO:0043226//organelle;GO:0044424//intracellular part;GO:0005634//nucleus;GO:0043229//intracellular organelle;GO:0005622//intracellular	GO:0004871//signal transducer activity;GO:0001071//nucleic acid binding transcription factor activity;GO:1901363//heterocyclic compound binding;GO:0097159//organic cyclic compound binding;GO:0000988//transcription factor activity, protein binding;GO:0003700//transcription factor activity, sequence-specific DNA binding;GO:0043167//ion binding;GO:0003677//DNA binding;GO:0003676//nucleic acid bindin…	GO:0032502//developmental process;GO:0048856//anatomical structure development;GO:0009987//cellular process;GO:0008152//metabolic process;GO:0044700//single organism signaling;GO:0007165//signal transduction;GO:0051716//cellular response to stimulus;GO:0050896//response to stimulus;GO:0050789//regulation of biological process;GO:0008150//biological_process;GO:0044763//single-organism cellular pro…
ENSDARG00000000161	68.5	63.5	1.905	1.4	-0.444364171	0.694363663	0.886549121	no	itsn2a	intersectin 2a [Source:ZFIN;Acc:ZDB-GENE-041014-84]	-	-	-	-	GO:0044464//cell part;GO:0005622//intracellular;GO:0005623//cell;GO:0005575//cellular_component	GO:0005488//binding;GO:0005515//protein binding;GO:0003674//molecular_function;GO:0043167//ion binding;GO:0019899//enzyme binding	GO:0044763//single-organism cellular process;GO:0023052//signaling;GO:0008150//biological_process;GO:0051179//localization;GO:0051234//establishment of localization;GO:0065007//biological regulation;GO:0016192//vesicle-mediated transport;GO:0007165//signal transduction;GO:0006810//transport;GO:0044700//single organism signaling;GO:0044699//single-organism process;GO:0050789//regulation of biologi…
ENSDARG00000000175	193	188	12.175	11.765	-0.049420452	0.816161225	0.969896147	no	hoxb2a	homeobox B2a [Source:ZFIN;Acc:ZDB-GENE-990415-103]	-	-	-	-	GO:0005622//intracellular;GO:0043226//organelle;GO:0043229//intracellular organelle;GO:0005634//nucleus;GO:0005623//cell;GO:0005575//cellular_component;GO:0043227//membrane-bounded organelle;GO:0044464//cell part;GO:0043231//intracellular membrane-bounded organelle;GO:0044424//intracellular part	GO:0097159//organic cyclic compound binding;GO:0005488//binding;GO:1901363//heterocyclic compound binding;GO:0003674//molecular_function;GO:0003676//nucleic acid binding;GO:0001071//nucleic acid binding transcription factor activity;GO:0003677//DNA binding;GO:0003700//transcription factor activity, sequence-specific DNA binding	GO:0009987//cellular process;GO:0008150//biological_process;GO:0034641//cellular nitrogen compound metabolic process;GO:0048856//anatomical structure development;GO:0032502//developmental process;GO:0009058//biosynthetic process;GO:0044237//cellular metabolic process;GO:0006807//nitrogen compound metabolic process;GO:0008152//metabolic process
ENSDARG00000000183	156.2	122.825	4.585	2.77	-0.727035758	0.104222729	0.263950389	no	ptpn4b	protein tyrosine phosphatase, non-receptor type 4b [Source:ZFIN;Acc:ZDB-GENE-030131-6259]	-	-	-	-	GO:0044464//cell part;GO:0005856//cytoskeleton;GO:0044424//intracellular part;GO:0005737//cytoplasm;GO:0043228//non-membrane-bounded organelle;GO:0005623//cell;GO:0005575//cellular_component;GO:0005622//intracellular;GO:0043232//intracellular non-membrane-bounded organelle;GO:0043229//intracellular organelle;GO:0043226//organelle	GO:0016788//hydrolase activity, acting on ester bonds;GO:0016787//hydrolase activity;GO:0042578//phosphoric ester hydrolase activity;GO:0003824//catalytic activity;GO:0008092//cytoskeletal protein binding;GO:0005488//binding;GO:0016791//phosphatase activity;GO:0005515//protein binding;GO:0003674//molecular_function	GO:0071704//organic substance metabolic process;GO:0008152//metabolic process;GO:0008150//biological_process;GO:0044237//cellular metabolic process;GO:0009987//cellular process;GO:0019538//protein metabolic process;GO:0044267//cellular protein metabolic process;GO:0043412//macromolecule modification;GO:0036211//protein modification process;GO:0044260//cellular macromolecule metabolic process;GO:0…
ENSDARG00000000189	355.5	301	9.175	7.565	-0.278368076	0.273765947	0.51099308	no	sema6e	sema domain, transmembrane domain (TM), and cytoplasmic domain, (semaphorin) 6E [Source:ZFIN;Acc:ZDB-GENE-040724-119]	-	-	-	-	GO:0005623//cell;GO:0044464//cell part;GO:0071944//cell periphery;GO:0005575//cellular_component;GO:0005886//plasma membrane;GO:0016020//membrane	GO:0003674//molecular_function	GO:0040011//locomotion;GO:0008150//biological_process
ENSDARG00000000212	2052.06	3397.11	157.54	258.835	0.716314533	0.000166688	0.001544069	no	krt97	keratin 97 [Source:ZFIN;Acc:ZDB-GENE-040718-78]	-	-	-	-	GO:0043229//intracellular organelle;GO:0043232//intracellular non-membrane-bounded organelle;GO:0044464//cell part;GO:0043226//organelle;GO:0005622//intracellular;GO:0044424//intracellular part;GO:0043228//non-membrane-bounded organelle;GO:0005575//cellular_component;GO:0005856//cytoskeleton;GO:0005623//cell	GO:0003674//molecular_function;GO:0005198//structural molecule activity	-
ENSDARG00000000229	335.5	399.5	8.52	9.93	0.220940287	0.166439643	0.364787239	no	usp49	ubiquitin specific peptidase 49 [Source:ZFIN;Acc:ZDB-GENE-050208-484]	-	-	-	-	-	GO:0008233//peptidase activity;GO:0003824//catalytic activity;GO:0043167//ion binding;GO:0016787//hydrolase activity;GO:0003674//molecular_function;GO:0005488//binding	GO:0036211//protein modification process;GO:0071704//organic substance metabolic process;GO:0044238//primary metabolic process;GO:0043170//macromolecule metabolic process;GO:0009056//catabolic process;GO:0044237//cellular metabolic process;GO:0006464//cellular protein modification process;GO:0044260//cellular macromolecule metabolic process;GO:0044267//cellular protein metabolic process;GO:000815…
ENSDARG00000000241	972	661	29.735	20.095	-0.565325498	0.001808895	0.011371256	no	slc40a1	solute carrier family 40 (iron-regulated transporter), member 1 [Source:ZFIN;Acc:ZDB-GENE-000511-8]	-	-	-	-	GO:0005575//cellular_component	GO:0022857//transmembrane transporter activity;GO:0005215//transporter activity;GO:0003674//molecular_function	GO:0044699//single-organism process;GO:1902578//single-organism localization;GO:0044765//single-organism transport;GO:0006810//transport;GO:0009987//cellular process;GO:0044763//single-organism cellular process;GO:0008150//biological_process;GO:0055085//transmembrane transport;GO:0051179//localization;GO:0051234//establishment of localization
ENSDARG00000000324	120	81	7.605	5.11	-0.573624957	0.018623164	0.073496473	no	dcaf8	PREDICTED: DDB1- and CUL4-associated factor 8 [Danio rerio]	-	-	-	-	-	-	-
ENSDARG00000000349	7	17	0.655	1.61	1.297493877	0.068806131	0.195511664	no	cfap300	si:rp71-1p14.7 [Source:ZFIN;Acc:ZDB-GENE-040724-203]	-	-	-	-	GO:0005575//cellular_component	GO:0003674//molecular_function	GO:0008150//biological_process
ENSDARG00000000369	55.5	50	4.81	4.29	-0.165059246	0.59529323	0.814150513	no	prkag3b	protein kinase, AMP-activated, gamma 3b non-catalytic subunit [Source:ZFIN;Acc:ZDB-GENE-060421-6938]	Organismal Systems;Environmental Information Processing	Signal transduction;Endocrine system	ko04068//FoxO signaling pathway;ko04910//Insulin signaling pathway;ko04920//Adipocytokine signaling pathway	K07200	GO:0005575//cellular_component	-	GO:0008150//biological_process
ENSDARG00000000370	504	418	6.495	5.355	-0.278442951	0.119841855	0.291567318	no	triob	trio Rho guanine nucleotide exchange factor b [Source:ZFIN;Acc:ZDB-GENE-030616-399]	-	-	-	-	-	GO:0043167//ion binding;GO:0003824//catalytic activity;GO:0003674//molecular_function;GO:0016740//transferase activity;GO:0019899//enzyme binding;GO:0016301//kinase activity;GO:0005515//protein binding;GO:0005488//binding;GO:0016772//transferase activity, transferring phosphorus-containing groups	GO:0044699//single-organism process;GO:0007165//signal transduction;GO:0007154//cell communication;GO:0044238//primary metabolic process;GO:0036211//protein modification process;GO:0044700//single organism signaling;GO:0044260//cellular macromolecule metabolic process;GO:0051716//cellular response to stimulus;GO:0050896//response to stimulus;GO:0008150//biological_process;GO:0050794//regulation o…
ENSDARG00000000380	16.5	16.5	0.585	0.61	0.060372618	1	1	no	pde6a	phosphodiesterase 6A, cGMP-specific, rod, alpha [Source:ZFIN;Acc:ZDB-GENE-030616-42]	Metabolism;Organismal Systems	Sensory system;Nucleotide metabolism	ko00230//Purine metabolism;ko04744//Phototransduction	K08718	-	GO:0005488//binding;GO:0043167//ion binding;GO:0003674//molecular_function	GO:0050789//regulation of biological process;GO:0065007//biological regulation;GO:0050896//response to stimulus;GO:0023052//signaling;GO:0044699//single-organism process;GO:0044700//single organism signaling;GO:0051716//cellular response to stimulus;GO:0050794//regulation of cellular process;GO:0009987//cellular process;GO:0007165//signal transduction;GO:0007154//cell communication;GO:0008150//bi…
ENSDARG00000000394	1415.5	1516	54.855	59.33	0.113138655	0.656898383	0.858246976	no	matr3l1.1	matrin 3-like 1.1 [Source:ZFIN;Acc:ZDB-GENE-030616-40]	-	-	-	-	GO:0043229//intracellular organelle;GO:0043231//intracellular membrane-bounded organelle;GO:0044464//cell part;GO:0043226//organelle;GO:0044424//intracellular part;GO:0043227//membrane-bounded organelle;GO:0005575//cellular_component;GO:0005623//cell;GO:0005634//nucleus;GO:0005622//intracellular	GO:1901363//heterocyclic compound binding;GO:0005488//binding;GO:0003723//RNA binding;GO:0003674//molecular_function;GO:0003676//nucleic acid binding;GO:0043167//ion binding;GO:0097159//organic cyclic compound binding	-
ENSDARG00000000423	47.095	77.24	2.915	4.71	0.692231176	0.02491682	0.092100655	no	si:ch73-314g15.3	si:ch73-314g15.3 [Source:ZFIN;Acc:ZDB-GENE-030616-19]	-	-	-	-	-	GO:0003674//molecular_function;GO:0016491//oxidoreductase activity;GO:0003824//catalytic activity	GO:0044699//single-organism process;GO:0071941//nitrogen cycle metabolic process;GO:0044281//small molecule metabolic process;GO:0008152//metabolic process;GO:0044710//single-organism metabolic process;GO:0006807//nitrogen compound metabolic process;GO:0008150//biological_process
ENSDARG00000000442	297	347.5	17.21	18.02	0.066351914	0.299966643	0.538091988	no	slc39a13	solute carrier family 39 (zinc transporter), member 13 [Source:ZFIN;Acc:ZDB-GENE-030616-17]	-	-	-	-	GO:0005575//cellular_component	GO:0022857//transmembrane transporter activity;GO:0003674//molecular_function;GO:0005215//transporter activity	GO:0044765//single-organism transport;GO:0044699//single-organism process;GO:0006810//transport;GO:0055085//transmembrane transport;GO:0008150//biological_process;GO:0051234//establishment of localization;GO:0051179//localization;GO:0009987//cellular process;GO:1902578//single-organism localization;GO:0044763//single-organism cellular process
ENSDARG00000000460	0.5	1	0.06	0.12	1	1	1	no	nitr2b	novel immune-type receptor 2b [Source:ZFIN;Acc:ZDB-GENE-001106-6]	-	-	-	-	GO:0005575//cellular_component	-	-
ENSDARG00000000472	308.5	151.5	12.82	6.265	-1.033009847	1.49E-07	2.98E-06	yes	cntn2	contactin 2 [Source:ZFIN;Acc:ZDB-GENE-990630-12]	-	-	-	-	-	-	GO:0040011//locomotion;GO:0051674//localization of cell;GO:0008150//biological_process;GO:0044767//single-organism developmental process;GO:0032989//cellular component morphogenesis;GO:0016043//cellular component organization;GO:0051179//localization;GO:0009987//cellular process;GO:0050896//response to stimulus;GO:0032502//developmental process;GO:0044763//single-organism cellular process;GO:0030…
ENSDARG00000000474	0	0	0.001	0.001	0	1	1	notest	tnni1a	troponin I type 1a (skeletal, slow) [Source:ZFIN;Acc:ZDB-GENE-030616-266]	-	-	-	-	GO:0005575//cellular_component;GO:0005623//cell;GO:0043232//intracellular non-membrane-bounded organelle;GO:0005737//cytoplasm;GO:0032991//macromolecular complex;GO:0043234//protein complex;GO:0043226//organelle;GO:0043229//intracellular organelle;GO:0044424//intracellular part;GO:0043228//non-membrane-bounded organelle;GO:0005856//cytoskeleton;GO:0044464//cell part;GO:0005622//intracellular	GO:0003674//molecular_function	GO:0032501//multicellular organismal process;GO:0003013//circulatory system process;GO:0008150//biological_process;GO:0003008//system process
ENSDARG00000000476	64.5	96	2.605	3.9	0.582190751	0.03141717	0.109371409	no	pms1	PMS1 homolog 1, mismatch repair system component [Source:ZFIN;Acc:ZDB-GENE-030616-528]	-	-	-	-	GO:0043234//protein complex;GO:0043229//intracellular organelle;GO:0005634//nucleus;GO:0005623//cell;GO:0043231//intracellular membrane-bounded organelle;GO:0005575//cellular_component;GO:0032991//macromolecular complex;GO:0044464//cell part;GO:0043227//membrane-bounded organelle;GO:0005622//intracellular;GO:0044424//intracellular part;GO:0043226//organelle	GO:0003677//DNA binding;GO:0016817//hydrolase activity, acting on acid anhydrides;GO:0003676//nucleic acid binding;GO:0016818//hydrolase activity, acting on acid anhydrides, in phosphorus-containing anhydrides;GO:0017111//nucleoside-triphosphatase activity;GO:0003824//catalytic activity;GO:1901363//heterocyclic compound binding;GO:0016887//ATPase activity;GO:0003674//molecular_function;GO:0016462…	GO:0044237//cellular metabolic process;GO:0044238//primary metabolic process;GO:0006725//cellular aromatic compound metabolic process;GO:0006139//nucleobase-containing compound metabolic process;GO:0006259//DNA metabolic process;GO:0050896//response to stimulus;GO:0006950//response to stress;GO:0044260//cellular macromolecule metabolic process;GO:0071704//organic substance metabolic process;GO:00…
ENSDARG00000000489	397.5	475.5	19.995	23.715	0.246160587	0.203616295	0.419764231	no	upf3b	UPF3B, regulator of nonsense mediated mRNA decay [Source:ZFIN;Acc:ZDB-GENE-040426-1630]	Genetic Information Processing	Translation	ko03013//RNA transport;ko03015//mRNA surveillance pathway	K14328	-	GO:0003674//molecular_function	-
ENSDARG00000000503	1503.5	900.5	43.12	21.45	-1.00737953	2.59E-05	0.000305051	yes	stx1b	syntaxin 1B [Source:ZFIN;Acc:ZDB-GENE-000330-4]	-	-	-	-	GO:0005886//plasma membrane;GO:0016020//membrane;GO:0005737//cytoplasm;GO:0032991//macromolecular complex;GO:0044444//cytoplasmic part;GO:0005622//intracellular;GO:0031982//vesicle;GO:0044424//intracellular part;GO:0043234//protein complex;GO:0031410//cytoplasmic vesicle;GO:0071944//cell periphery;GO:0005575//cellular_component;GO:0044464//cell part;GO:0043229//intracellular organelle;GO:0043226/…	GO:0003674//molecular_function	GO:0016192//vesicle-mediated transport;GO:0044763//single-organism cellular process;GO:0006810//transport;GO:0044700//single organism signaling;GO:0016043//cellular component organization;GO:0051179//localization;GO:0007267//cell-cell signaling;GO:0007154//cell communication;GO:0009987//cellular process;GO:0051234//establishment of localization;GO:0061024//membrane organization;GO:0008150//biolog…
ENSDARG00000000516	5.5	8.5	0.205	0.27	0.397335498	0.443707198	0.688279255	no	ankar	ankyrin and armadillo repeat containing [Source:ZFIN;Acc:ZDB-GENE-030616-533]	-	-	-	-	GO:0044464//cell part;GO:0043229//intracellular organelle;GO:0005622//intracellular;GO:0005634//nucleus;GO:0043231//intracellular membrane-bounded organelle;GO:0044424//intracellular part;GO:0005737//cytoplasm;GO:0005623//cell;GO:0043226//organelle;GO:0005575//cellular_component;GO:0043227//membrane-bounded organelle	-	-
ENSDARG00000000529	151	206	5.905	8.015	0.440765461	0.035857161	0.120796149	no	ofd1	oral-facial-digital syndrome 1 protein homolog isoform 1 [Danio rerio]	-	-	-	-	GO:0043229//intracellular organelle;GO:0015630//microtubule cytoskeleton;GO:0005813//centrosome;GO:0005623//cell;GO:0044430//cytoskeletal part;GO:0043232//intracellular non-membrane-bounded organelle;GO:0044424//intracellular part;GO:0044464//cell part;GO:0044422//organelle part;GO:0044446//intracellular organelle part;GO:0005622//intracellular;GO:0043226//organelle;GO:0043231//intracellular memb…	-	GO:0044767//single-organism developmental process;GO:0009987//cellular process;GO:0048856//anatomical structure development;GO:0016043//cellular component organization;GO:0007369//gastrulation;GO:0044699//single-organism process;GO:0032501//multicellular organismal process;GO:0007018//microtubule-based movement;GO:0048598//embryonic morphogenesis;GO:0032502//developmental process;GO:0044763//sing…
ENSDARG00000000540	176.25	296.74	10.905	22.11	1.019709255	0.000195482	0.001770755	yes	asdurf	asparagine synthetase domain containing 1 [Source:ZFIN;Acc:ZDB-GENE-030616-362]	-	-	-	-	-	GO:0003674//molecular_function;GO:0016874//ligase activity;GO:0003824//catalytic activity	GO:0006807//nitrogen compound metabolic process;GO:0008152//metabolic process;GO:0006082//organic acid metabolic process;GO:0044699//single-organism process;GO:0044237//cellular metabolic process;GO:0044710//single-organism metabolic process;GO:0008150//biological_process;GO:0034641//cellular nitrogen compound metabolic process;GO:0044238//primary metabolic process;GO:0019752//carboxylic acid met…
ENSDARG00000000542	291.845	290	15.47	14.16	-0.127651931	0.913125881	1	no	gtf2e1	general transcription factor IIE, polypeptide 1, alpha [Source:ZFIN;Acc:ZDB-GENE-041210-221]	Genetic Information Processing	Transcription	ko03022//Basal transcription factors	K03136	-	GO:0003676//nucleic acid binding;GO:0003677//DNA binding;GO:0005488//binding;GO:0003674//molecular_function;GO:0097159//organic cyclic compound binding;GO:1901363//heterocyclic compound binding	GO:0008150//biological_process;GO:0034641//cellular nitrogen compound metabolic process;GO:0009058//biosynthetic process;GO:0009987//cellular process;GO:0006807//nitrogen compound metabolic process;GO:0044237//cellular metabolic process;GO:0008152//metabolic process
ENSDARG00000000551	606	634	25.09	26.165	0.060525788	0.784961087	0.948642797	no	slc1a4	solute carrier family 1 (glutamate/neutral amino acid transporter), member 4 [Source:ZFIN;Acc:ZDB-GENE-030616-566]	-	-	-	-	GO:0005575//cellular_component	GO:0022857//transmembrane transporter activity;GO:0005215//transporter activity;GO:0003674//molecular_function	GO:0008150//biological_process;GO:0044699//single-organism process;GO:0044763//single-organism cellular process;GO:0051179//localization;GO:1902578//single-organism localization;GO:0009987//cellular process;GO:0051234//establishment of localization;GO:0044765//single-organism transport;GO:0055085//transmembrane transport;GO:0006810//transport
ENSDARG00000000563	7059	8251	9.25	10.855	0.230834455	0.54834615	0.772505827	no	ttn.1	titin, tandem duplicate 1 [Source:ZFIN;Acc:ZDB-GENE-030616-413]	-	-	-	-	-	GO:0016301//kinase activity;GO:0016740//transferase activity;GO:0043167//ion binding;GO:0005488//binding;GO:0003674//molecular_function;GO:0003824//catalytic activity;GO:0016772//transferase activity, transferring phosphorus-containing groups	GO:0044085//cellular component biogenesis;GO:0071704//organic substance metabolic process;GO:0043412//macromolecule modification;GO:0044699//single-organism process;GO:0036211//protein modification process;GO:0044763//single-organism cellular process;GO:0019538//protein metabolic process;GO:0009653//anatomical structure morphogenesis;GO:0048856//anatomical structure development;GO:0044237//cellul…
ENSDARG00000000567	834	393.5	17.195	8.045	-1.09582479	1.15E-09	3.57E-08	yes	znf281a	zinc finger protein 281a [Source:ZFIN;Acc:ZDB-GENE-131126-34]	-	-	-	-	-	GO:0003674//molecular_function	-
ENSDARG00000000568	350	528.5	12.185	18.51	0.603198644	0.001284146	0.008615419	no	ell	elongation factor RNA polymerase II [Source:ZFIN;Acc:ZDB-GENE-030131-3946]	-	-	-	-	GO:0044464//cell part;GO:0044446//intracellular organelle part;GO:0043226//organelle;GO:0043233//organelle lumen;GO:0043234//protein complex;GO:0005623//cell;GO:0005634//nucleus;GO:0031981//nuclear lumen;GO:0043227//membrane-bounded organelle;GO:0044428//nuclear part;GO:0005575//cellular_component;GO:0070013//intracellular organelle lumen;GO:0005654//nucleoplasm;GO:0043231//intracellular membrane…	GO:0003674//molecular_function;GO:0097159//organic cyclic compound binding;GO:0005488//binding;GO:0008135//translation factor activity, RNA binding;GO:1901363//heterocyclic compound binding;GO:0003676//nucleic acid binding;GO:0003723//RNA binding	GO:0044267//cellular protein metabolic process;GO:0006412//translation;GO:0044249//cellular biosynthetic process;GO:0071704//organic substance metabolic process;GO:0044238//primary metabolic process;GO:1901564//organonitrogen compound metabolic process;GO:0034645//cellular macromolecule biosynthetic process;GO:0043170//macromolecule metabolic process;GO:0043043//peptide biosynthetic process;GO:00…
ENSDARG00000000588	21	65.5	0.995	3.095	1.637170979	6.36E-06	8.88E-05	yes	grasp	GRP1 (general receptor for phosphoinositides 1)-associated scaffold protein [Source:ZFIN;Acc:ZDB-GENE-060312-30]	-	-	-	-	GO:0005886//plasma membrane;GO:0044464//cell part;GO:0016020//membrane;GO:0071944//cell periphery;GO:0005575//cellular_component;GO:0005623//cell	-	GO:0023052//signaling;GO:0007165//signal transduction;GO:0009987//cellular process;GO:0044700//single organism signaling;GO:0044763//single-organism cellular process;GO:0044699//single-organism process;GO:0050789//regulation of biological process;GO:0050794//regulation of cellular process;GO:0050896//response to stimulus;GO:0008150//biological_process;GO:0051716//cellular response to stimulus;GO:…
ENSDARG00000000606	47	121	0.435	1.115	1.357956404	3.32E-07	6.19E-06	yes	dnah6	dynein, axonemal, heavy chain 6 [Source:ZFIN;Acc:ZDB-GENE-030616-623]	-	-	-	-	GO:0005622//intracellular;GO:0043232//intracellular non-membrane-bounded organelle;GO:0043229//intracellular organelle;GO:0044464//cell part;GO:0005737//cytoplasm;GO:0005575//cellular_component;GO:0005929//cilium;GO:0043234//protein complex;GO:0043226//organelle;GO:0005623//cell;GO:0042995//cell projection;GO:0043228//non-membrane-bounded organelle;GO:0032991//macromolecular complex;GO:0044424//i…	GO:0005488//binding;GO:0016787//hydrolase activity;GO:0003674//molecular_function;GO:0016887//ATPase activity;GO:0016462//pyrophosphatase activity;GO:0017111//nucleoside-triphosphatase activity;GO:0016818//hydrolase activity, acting on acid anhydrides, in phosphorus-containing anhydrides;GO:0043167//ion binding;GO:0003824//catalytic activity;GO:0016817//hydrolase activity, acting on acid anhydrid…	GO:0006928//movement of cell or subcellular component;GO:0022607//cellular component assembly;GO:0016043//cellular component organization;GO:0009987//cellular process;GO:0008150//biological_process;GO:0032502//developmental process;GO:0051674//localization of cell;GO:0071840//cellular component organization or biogenesis;GO:0048870//cell motility;GO:0044085//cellular component biogenesis;GO:00511…
ENSDARG00000000631	344	438.5	9.505	11.605	0.287987991	0.062563802	0.182520845	no	ptpn4a	protein tyrosine phosphatase, non-receptor type 4a [Source:ZFIN;Acc:ZDB-GENE-030616-449]	-	-	-	-	GO:0043228//non-membrane-bounded organelle;GO:0005623//cell;GO:0044424//intracellular part;GO:0043226//organelle;GO:0005622//intracellular;GO:0043232//intracellular non-membrane-bounded organelle;GO:0043229//intracellular organelle;GO:0005575//cellular_component;GO:0005737//cytoplasm;GO:0005856//cytoskeleton;GO:0044464//cell part	GO:0005488//binding;GO:0016791//phosphatase activity;GO:0016788//hydrolase activity, acting on ester bonds;GO:0003674//molecular_function;GO:0005515//protein binding;GO:0008092//cytoskeletal protein binding;GO:0003824//catalytic activity;GO:0016787//hydrolase activity;GO:0042578//phosphoric ester hydrolase activity	GO:0044267//cellular protein metabolic process;GO:0044237//cellular metabolic process;GO:0006464//cellular protein modification process;GO:0071704//organic substance metabolic process;GO:0019538//protein metabolic process;GO:0009987//cellular process;GO:0008152//metabolic process;GO:0008150//biological_process;GO:0044260//cellular macromolecule metabolic process;GO:0036211//protein modification p…
ENSDARG00000000638	0	0	0.001	0.001	0	1	1	notest	opn1mw4	opsin 1 (cone pigments), medium-wave-sensitive, 4 [Source:ZFIN;Acc:ZDB-GENE-990604-43]	Organismal Systems	Sensory system	ko04744//Phototransduction	K04250	GO:0005929//cilium;GO:0043226//organelle;GO:0042995//cell projection;GO:0044464//cell part;GO:0005623//cell;GO:0005575//cellular_component	GO:0004871//signal transducer activity;GO:0003674//molecular_function	GO:0044699//single-organism process;GO:0043170//macromolecule metabolic process;GO:0044238//primary metabolic process;GO:0006464//cellular protein modification process;GO:0044237//cellular metabolic process;GO:0008152//metabolic process;GO:0071704//organic substance metabolic process;GO:0032501//multicellular organismal process;GO:0003008//system process;GO:0050877//neurological system process;GO…
ENSDARG00000000651	17.5	43.5	1.455	3.57	1.294904921	0.003323502	0.018750369	yes	osgepl1	O-sialoglycoprotein endopeptidase-like 1 [Source:ZFIN;Acc:ZDB-GENE-030616-532]	-	-	-	-	GO:0044444//cytoplasmic part;GO:0005623//cell;GO:0044464//cell part;GO:0005622//intracellular;GO:0043227//membrane-bounded organelle;GO:0044424//intracellular part;GO:0005575//cellular_component;GO:0043229//intracellular organelle;GO:0005739//mitochondrion;GO:0005737//cytoplasm;GO:0043226//organelle;GO:0043231//intracellular membrane-bounded organelle	GO:0016746//transferase activity, transferring acyl groups;GO:0005488//binding;GO:0003824//catalytic activity;GO:0003674//molecular_function;GO:0016787//hydrolase activity;GO:0008233//peptidase activity;GO:0043167//ion binding;GO:0016740//transferase activity	GO:0044260//cellular macromolecule metabolic process;GO:0090304//nucleic acid metabolic process;GO:0006725//cellular aromatic compound metabolic process;GO:0006399//tRNA metabolic process;GO:0043170//macromolecule metabolic process;GO:0006139//nucleobase-containing compound metabolic process;GO:0034641//cellular nitrogen compound metabolic process;GO:0034660//ncRNA metabolic process;GO:0071704//o…
ENSDARG00000000656	1	0.5	0.1	0.05	-1	1	1	no	psmb9a	proteasome subunit beta 9a [Source:ZFIN;Acc:ZDB-GENE-990415-140]	Genetic Information Processing	Folding, sorting and degradation	ko03050//Proteasome	K02741	GO:0005623//cell;GO:0032991//macromolecular complex;GO:0043226//organelle;GO:0043234//protein complex;GO:0044424//intracellular part;GO:0005634//nucleus;GO:0005575//cellular_component;GO:0043227//membrane-bounded organelle;GO:0044464//cell part;GO:0005737//cytoplasm;GO:0043231//intracellular membrane-bounded organelle;GO:0005622//intracellular;GO:0043229//intracellular organelle	GO:0003674//molecular_function;GO:0003824//catalytic activity;GO:0016787//hydrolase activity;GO:0008233//peptidase activity	GO:0002376//immune system process;GO:0008152//metabolic process;GO:0009056//catabolic process;GO:0008150//biological_process
ENSDARG00000000666	43	158.5	2.135	7.86	1.880293243	5.17E-12	2.36E-10	yes	creg2	cellular repressor of E1A-stimulated genes 2 [Source:ZFIN;Acc:ZDB-GENE-041114-173]	-	-	-	-	GO:0005575//cellular_component	GO:0003674//molecular_function	-
ENSDARG00000000690	149.5	197	8.785	11.47	0.3847512	0.062514584	0.182446937	no	sypl2b	synaptophysin-like 2b [Source:ZFIN;Acc:ZDB-GENE-050417-309]	-	-	-	-	GO:0031410//cytoplasmic vesicle;GO:0005622//intracellular;GO:0043229//intracellular organelle;GO:0005623//cell;GO:0005575//cellular_component;GO:0044464//cell part;GO:0044444//cytoplasmic part;GO:0031982//vesicle;GO:0044424//intracellular part;GO:0043226//organelle;GO:0005737//cytoplasm	-	-
ENSDARG00000000729	407.5	477	23.115	24.1	0.060203784	0.245631525	0.478114637	no	daxx	death-domain associated protein [Source:ZFIN;Acc:ZDB-GENE-010110-3]	Environmental Information Processing	Signal transduction	ko04010//MAPK signaling pathway	K02308	GO:0005622//intracellular;GO:0005623//cell;GO:0043229//intracellular organelle;GO:0043227//membrane-bounded organelle;GO:0005575//cellular_component;GO:0044424//intracellular part;GO:0005634//nucleus;GO:0044464//cell part;GO:0043226//organelle;GO:0043231//intracellular membrane-bounded organelle	GO:0000988//transcription factor activity, protein binding;GO:0003674//molecular_function	GO:0044237//cellular metabolic process;GO:0008152//metabolic process;GO:0009987//cellular process;GO:0034641//cellular nitrogen compound metabolic process;GO:0008150//biological_process;GO:0006807//nitrogen compound metabolic process;GO:0009058//biosynthetic process
ENSDARG00000000730	50	50.5	2.185	2.14	-0.030022483	1	1	no	slc6a22.1	solute carrier family 6 member 22, tandem duplicate 1 [Source:ZFIN;Acc:ZDB-GENE-030616-629]	-	-	-	-	GO:0016020//membrane;GO:0071944//cell periphery;GO:0044464//cell part;GO:0005886//plasma membrane;GO:0005575//cellular_component;GO:0005623//cell	GO:0022857//transmembrane transporter activity;GO:0005215//transporter activity;GO:0003674//molecular_function	GO:0008150//biological_process;GO:0044699//single-organism process;GO:0051234//establishment of localization;GO:0051179//localization;GO:0055085//transmembrane transport;GO:0009987//cellular process;GO:1902578//single-organism localization;GO:0006810//transport;GO:0044765//single-organism transport;GO:0044763//single-organism cellular process
ENSDARG00000000747	32.155	45.5	1.465	2.035	0.47412813	0.143438528	0.331323332	no	lcmt2	leucine carboxyl methyltransferase 2 [Source:ZFIN;Acc:ZDB-GENE-110714-2]	-	-	-	-	GO:0044444//cytoplasmic part;GO:0005623//cell;GO:0005737//cytoplasm;GO:0005622//intracellular;GO:0044464//cell part;GO:0005575//cellular_component;GO:0005829//cytosol;GO:0044424//intracellular part	GO:0016741//transferase activity, transferring one-carbon groups;GO:0003674//molecular_function;GO:0003824//catalytic activity;GO:0016740//transferase activity;GO:0008168//methyltransferase activity	GO:0006399//tRNA metabolic process;GO:0008152//metabolic process;GO:0090304//nucleic acid metabolic process;GO:0044237//cellular metabolic process;GO:0009987//cellular process;GO:0043170//macromolecule metabolic process;GO:0046483//heterocycle metabolic process;GO:0016070//RNA metabolic process;GO:0006725//cellular aromatic compound metabolic process;GO:0006807//nitrogen compound metabolic proces…
ENSDARG00000000760	31.5	36.5	3.82	4.345	0.185783539	0.676085641	0.872190769	no	znf511	zinc finger protein 511 [Source:ZFIN;Acc:ZDB-GENE-030616-621]	-	-	-	-	GO:0044464//cell part;GO:0005575//cellular_component;GO:0043227//membrane-bounded organelle;GO:0005634//nucleus;GO:0044424//intracellular part;GO:0043229//intracellular organelle;GO:0005622//intracellular;GO:0043226//organelle;GO:0005623//cell;GO:0043231//intracellular membrane-bounded organelle	GO:1901363//heterocyclic compound binding;GO:0097159//organic cyclic compound binding;GO:0043167//ion binding;GO:0005488//binding;GO:0003674//molecular_function;GO:0003677//DNA binding;GO:0003676//nucleic acid binding	GO:0009987//cellular process;GO:0009058//biosynthetic process;GO:0008150//biological_process;GO:0006807//nitrogen compound metabolic process;GO:0044237//cellular metabolic process;GO:0008152//metabolic process;GO:0034641//cellular nitrogen compound metabolic process
ENSDARG00000000767	21.905	19.26	1.26	1.245	-0.017277991	0.671549095	0.868095435	no	spi1b	Spi-1 proto-oncogene b [Source:ZFIN;Acc:ZDB-GENE-980526-164]	-	-	-	-	GO:0044424//intracellular part;GO:0043227//membrane-bounded organelle;GO:0005575//cellular_component;GO:0005622//intracellular;GO:0043229//intracellular organelle;GO:0005623//cell;GO:0005634//nucleus;GO:0043226//organelle;GO:0044464//cell part;GO:0043231//intracellular membrane-bounded organelle	GO:0003674//molecular_function;GO:0005488//binding;GO:0001071//nucleic acid binding transcription factor activity;GO:0003700//transcription factor activity, sequence-specific DNA binding;GO:1901363//heterocyclic compound binding;GO:0097159//organic cyclic compound binding;GO:0003676//nucleic acid binding;GO:0003677//DNA binding	GO:0042592//homeostatic process;GO:0009058//biosynthetic process;GO:0044699//single-organism process;GO:0044763//single-organism cellular process;GO:0032502//developmental process;GO:0034641//cellular nitrogen compound metabolic process;GO:0002376//immune system process;GO:0044767//single-organism developmental process;GO:0065008//regulation of biological quality;GO:0065007//biological regulation…
ENSDARG00000000779	471.5	514.5	25.64	27.63	0.1078393	0.601432578	0.818643324	no	scfd1	sec1 family domain containing 1 [Source:ZFIN;Acc:ZDB-GENE-030116-3]	-	-	-	-	GO:0044464//cell part;GO:0005737//cytoplasm;GO:0005575//cellular_component;GO:0005622//intracellular;GO:0044424//intracellular part;GO:0005623//cell	-	GO:0051179//localization;GO:0048856//anatomical structure development;GO:0006810//transport;GO:0032501//multicellular organismal process;GO:0006950//response to stress;GO:0040007//growth;GO:0032502//developmental process;GO:0009790//embryo development;GO:0044699//single-organism process;GO:0050896//response to stimulus;GO:0044707//single-multicellular organism process;GO:0016192//vesicle-mediated…
ENSDARG00000000796	139.5	126.5	6.17	5.925	-0.058455335	0.553894579	0.777743781	no	nr4a1	nuclear receptor subfamily 4, group A, member 1 [Source:ZFIN;Acc:ZDB-GENE-040704-11]	Environmental Information Processing	Signal transduction	ko04010//MAPK signaling pathway	K04465	GO:0005623//cell;GO:0043231//intracellular membrane-bounded organelle;GO:0005622//intracellular;GO:0005575//cellular_component;GO:0044424//intracellular part;GO:0044464//cell part;GO:0043227//membrane-bounded organelle;GO:0043229//intracellular organelle;GO:0043226//organelle;GO:0005634//nucleus	GO:0003674//molecular_function;GO:1901363//heterocyclic compound binding;GO:0043167//ion binding;GO:0003677//DNA binding;GO:0003676//nucleic acid binding;GO:0005488//binding;GO:0001071//nucleic acid binding transcription factor activity;GO:0004871//signal transducer activity;GO:0097159//organic cyclic compound binding;GO:0003700//transcription factor activity, sequence-specific DNA binding	GO:0009058//biosynthetic process;GO:0023052//signaling;GO:0008152//metabolic process;GO:0007154//cell communication;GO:0065007//biological regulation;GO:0034641//cellular nitrogen compound metabolic process;GO:0044237//cellular metabolic process;GO:0050794//regulation of cellular process;GO:0050789//regulation of biological process;GO:0008150//biological_process;GO:0007165//signal transduction;GO…
ENSDARG00000000804	123.5	189	10.1	15.065	0.57684538	0.00424638	0.022796725	no	rassf6	Ras association (RalGDS/AF-6) domain family 6 [Source:ZFIN;Acc:ZDB-GENE-030616-513]	-	-	-	-	GO:0005575//cellular_component	-	GO:0050896//response to stimulus;GO:0050794//regulation of cellular process;GO:0044700//single organism signaling;GO:0008219//cell death;GO:0008150//biological_process;GO:0023052//signaling;GO:0044763//single-organism cellular process;GO:0007154//cell communication;GO:0016265//death;GO:0050789//regulation of biological process;GO:0051716//cellular response to stimulus;GO:0009987//cellular process…
ENSDARG00000000830	148.5	154.5	5.76	5.935	0.043179218	0.852918528	0.99411844	no	telo2	RecName: Full=Telomere length regulation protein TEL2 homolog	Genetic Information Processing	Replication and repair	ko03460//Fanconi anemia pathway	K11137	GO:0043226//organelle;GO:0044464//cell part;GO:0043231//intracellular membrane-bounded organelle;GO:0005622//intracellular;GO:0043227//membrane-bounded organelle;GO:0043229//intracellular organelle;GO:0005623//cell;GO:0044424//intracellular part	-	-
ENSDARG00000000837	112.5	131	4.47	5.15	0.204297601	0.415831673	0.658699188	no	snx9a	sorting nexin 9a [Source:ZFIN;Acc:ZDB-GENE-030616-66]	-	-	-	-	GO:0031982//vesicle;GO:0031410//cytoplasmic vesicle;GO:0005623//cell;GO:0005737//cytoplasm;GO:0044444//cytoplasmic part;GO:0044464//cell part;GO:0043229//intracellular organelle;GO:0043226//organelle;GO:0044424//intracellular part;GO:0005575//cellular_component;GO:0005622//intracellular	GO:0003674//molecular_function;GO:0008289//lipid binding;GO:0005488//binding;GO:0043167//ion binding	GO:0008150//biological_process;GO:0007049//cell cycle;GO:0051179//localization;GO:0006810//transport;GO:0051234//establishment of localization;GO:0044763//single-organism cellular process;GO:0009987//cellular process;GO:0016192//vesicle-mediated transport;GO:0000278//mitotic cell cycle;GO:0044699//single-organism process;GO:0051301//cell division
ENSDARG00000000853	382.5	475.5	13.5	16.79	0.314642823	0.09038492	0.23793965	no	dstyk	dual serine/threonine and tyrosine protein kinase [Source:ZFIN;Acc:ZDB-GENE-040826-2]	-	-	-	-	GO:0016020//membrane;GO:0005623//cell;GO:0005886//plasma membrane;GO:0005622//intracellular;GO:0071944//cell periphery;GO:0005829//cytosol;GO:0005575//cellular_component;GO:0044464//cell part;GO:0005737//cytoplasm;GO:0044444//cytoplasmic part;GO:0044424//intracellular part	GO:0003674//molecular_function;GO:0016301//kinase activity;GO:0003824//catalytic activity;GO:0005488//binding;GO:0016772//transferase activity, transferring phosphorus-containing groups;GO:0016740//transferase activity;GO:0043167//ion binding	GO:0048856//anatomical structure development;GO:0009987//cellular process;GO:0044267//cellular protein metabolic process;GO:0043170//macromolecule metabolic process;GO:0044700//single organism signaling;GO:0032502//developmental process;GO:0044763//single-organism cellular process;GO:0008150//biological_process;GO:0006464//cellular protein modification process;GO:0008152//metabolic process;GO:005…
ENSDARG00000000857	356.5	583	19.195	30.95	0.689208849	0.000100159	0.000997464	no	mapk14a	mitogen-activated protein kinase 14a [Source:ZFIN;Acc:ZDB-GENE-010202-2]	Organismal Systems;Environmental Information Processing	Signal transduction;Circulatory system;Endocrine system;Immune system	ko04010//MAPK signaling pathway;ko04261//Adrenergic signaling in cardiomyocytes;ko04068//FoxO signaling pathway;ko04912//GnRH signaling pathway;ko04914//Progesterone-mediated oocyte maturation;ko04620//Toll-like receptor signaling pathway;ko04370//VEGF signaling pathway;ko04622//RIG-I-like receptor signaling pathway;ko04621//NOD-like receptor signaling pathway	K04441	GO:0044424//intracellular part;GO:0044464//cell part;GO:0043231//intracellular membrane-bounded organelle;GO:0005737//cytoplasm;GO:0005623//cell;GO:0005622//intracellular;GO:0005634//nucleus;GO:0043227//membrane-bounded organelle;GO:0043226//organelle;GO:0005575//cellular_component;GO:0043229//intracellular organelle	GO:0004871//signal transducer activity;GO:0016772//transferase activity, transferring phosphorus-containing groups;GO:0003674//molecular_function;GO:0043167//ion binding;GO:0003824//catalytic activity;GO:0005488//binding;GO:0016740//transferase activity;GO:0016301//kinase activity	GO:0034641//cellular nitrogen compound metabolic process;GO:0044260//cellular macromolecule metabolic process;GO:0043170//macromolecule metabolic process;GO:0048869//cellular developmental process;GO:0023052//signaling;GO:0044699//single-organism process;GO:0044238//primary metabolic process;GO:0050794//regulation of cellular process;GO:0044707//single-multicellular organism process;GO:0008152//m…
ENSDARG00000000861	1676.98	2063.5	33.685	39.095	0.214877809	0.121611841	0.294499597	no	scrib	scribbled planar cell polarity protein [Source:ZFIN;Acc:ZDB-GENE-030616-572]	-	-	-	-	GO:0043226//organelle;GO:0005575//cellular_component;GO:0043229//intracellular organelle;GO:0005856//cytoskeleton;GO:0016020//membrane;GO:0005886//plasma membrane;GO:0043232//intracellular non-membrane-bounded organelle;GO:0005622//intracellular;GO:0044424//intracellular part;GO:0005623//cell;GO:0043228//non-membrane-bounded organelle;GO:0044464//cell part;GO:0071944//cell periphery;GO:0005737//c…	GO:0016772//transferase activity, transferring phosphorus-containing groups;GO:0003824//catalytic activity;GO:0016301//kinase activity;GO:0003674//molecular_function;GO:0016740//transferase activity	GO:0044707//single-multicellular organism process;GO:0034641//cellular nitrogen compound metabolic process;GO:0044281//small molecule metabolic process;GO:0007154//cell communication;GO:0071840//cellular component organization or biogenesis;GO:0044763//single-organism cellular process;GO:0044710//single-organism metabolic process;GO:0023052//signaling;GO:0007049//cell cycle;GO:0007155//cell adhes…
ENSDARG00000000887	126.5	259	13.955	28.54	1.03220321	9.39E-07	1.59E-05	yes	zgc:56699	zgc:56699 [Source:ZFIN;Acc:ZDB-GENE-040426-2099]	-	-	-	-	GO:0005575//cellular_component	-	-
ENSDARG00000000906	18	22	1.415	1.855	0.390617134	0.557949334	0.780762694	no	skap2	src kinase associated phosphoprotein 2 [Source:ZFIN;Acc:ZDB-GENE-030616-438]	-	-	-	-	GO:0044464//cell part;GO:0005886//plasma membrane;GO:0005737//cytoplasm;GO:0005622//intracellular;GO:0016020//membrane;GO:0005623//cell;GO:0044424//intracellular part;GO:0071944//cell periphery;GO:0005575//cellular_component	GO:0003674//molecular_function;GO:0060090//binding, bridging;GO:0030674//protein binding, bridging;GO:0005488//binding;GO:0005515//protein binding	GO:0002376//immune system process;GO:0050789//regulation of biological process;GO:0009987//cellular process;GO:0044700//single organism signaling;GO:0050896//response to stimulus;GO:0044699//single-organism process;GO:0008150//biological_process;GO:0007154//cell communication;GO:0051716//cellular response to stimulus;GO:0050794//regulation of cellular process;GO:0065007//biological regulation;GO:…
ENSDARG00000000935	153.5	142.5	5.445	4.975	-0.130235523	0.621537811	0.834479552	no	unk	unkempt family zinc finger [Source:ZFIN;Acc:ZDB-GENE-040426-707]	-	-	-	-	GO:0005575//cellular_component	GO:0043167//ion binding;GO:0005488//binding;GO:0003674//molecular_function	-
ENSDARG00000000943	348	410	12.75	14.725	0.207770387	0.197219031	0.410001872	no	dzip1	DAZ interacting zinc finger protein 1 [Source:ZFIN;Acc:ZDB-GENE-040526-1]	-	-	-	-	-	GO:0003674//molecular_function	-
ENSDARG00000000966	1533	1000.5	19.375	12.29	-0.656711395	0.002278983	0.013735555	no	ncor2	nuclear receptor corepressor 2 [Source:ZFIN;Acc:ZDB-GENE-030616-81]	Environmental Information Processing	Signal transduction	ko04330//Notch signaling pathway	K06065	GO:0043231//intracellular membrane-bounded organelle;GO:0043229//intracellular organelle;GO:0031981//nuclear lumen;GO:0044464//cell part;GO:0005623//cell;GO:0044424//intracellular part;GO:0043227//membrane-bounded organelle;GO:0005575//cellular_component;GO:0005634//nucleus;GO:0044422//organelle part;GO:0005654//nucleoplasm;GO:0043233//organelle lumen;GO:0005622//intracellular;GO:0070013//intrace…	GO:1901363//heterocyclic compound binding;GO:0003676//nucleic acid binding;GO:0003677//DNA binding;GO:0000988//transcription factor activity, protein binding;GO:0097159//organic cyclic compound binding;GO:0005488//binding;GO:0005515//protein binding;GO:0003674//molecular_function;GO:0008134//transcription factor binding	GO:0008152//metabolic process;GO:0030154//cell differentiation;GO:0032502//developmental process;GO:0044763//single-organism cellular process;GO:0044699//single-organism process;GO:0044237//cellular metabolic process;GO:0006807//nitrogen compound metabolic process;GO:0009058//biosynthetic process;GO:0048856//anatomical structure development;GO:0048869//cellular developmental process;GO:0002376//i…
ENSDARG00000001014	4899	7529	103.325	157.555	0.608666175	0.001846837	0.01156226	no	myh9b	myosin, heavy chain 9b, non-muscle [Source:ZFIN;Acc:ZDB-GENE-030131-998]	-	-	-	-	GO:0044464//cell part;GO:0043229//intracellular organelle;GO:0043234//protein complex;GO:0032991//macromolecular complex;GO:0005622//intracellular;GO:0043228//non-membrane-bounded organelle;GO:0043232//intracellular non-membrane-bounded organelle;GO:0005856//cytoskeleton;GO:0044424//intracellular part;GO:0005575//cellular_component;GO:0043226//organelle;GO:0005623//cell	GO:0043167//ion binding;GO:0003674//molecular_function;GO:0005515//protein binding;GO:0008092//cytoskeletal protein binding;GO:0005488//binding	GO:0009987//cellular process;GO:0009653//anatomical structure morphogenesis;GO:0044707//single-multicellular organism process;GO:0048869//cellular developmental process;GO:0006996//organelle organization;GO:0044699//single-organism process;GO:0032502//developmental process;GO:0007010//cytoskeleton organization;GO:0016043//cellular component organization;GO:0032989//cellular component morphogenesi…
ENSDARG00000001015	329	228	17.015	13.415	-0.342960097	0.008009301	0.038032576	no	znf384l	zinc finger protein 384 like [Source:ZFIN;Acc:ZDB-GENE-030616-498]	-	-	-	-	-	GO:0003674//molecular_function	-
ENSDARG00000001057	469	932	36.03	71.105	0.98075236	2.37E-08	5.66E-07	no	bysl	bystin [Danio rerio]	-	-	-	-	-	-	-
ENSDARG00000001127	80.5	49	3.56	2.155	-0.724189372	0.01056026	0.047436408	no	slc17a6a	solute carrier family 17 (vesicular glutamate transporter), member 6a [Source:ZFIN;Acc:ZDB-GENE-050105-4]	-	-	-	-	GO:0005575//cellular_component	-	GO:0006810//transport;GO:0051179//localization;GO:0051234//establishment of localization;GO:0009987//cellular process;GO:0044765//single-organism transport;GO:0044763//single-organism cellular process;GO:1902578//single-organism localization;GO:0008150//biological_process;GO:0055085//transmembrane transport;GO:0044699//single-organism process
ENSDARG00000001129	878.5	898	11.82	12.085	0.031987438	0.908868795	1	no	dicer1	dicer 1, ribonuclease type III [Source:ZFIN;Acc:ZDB-GENE-030131-3445]	-	-	-	-	GO:0043227//membrane-bounded organelle;GO:0044464//cell part;GO:0005623//cell;GO:0005737//cytoplasm;GO:0005622//intracellular;GO:0043231//intracellular membrane-bounded organelle;GO:0005634//nucleus;GO:0005575//cellular_component;GO:0044424//intracellular part;GO:0043226//organelle;GO:0043229//intracellular organelle	GO:0016462//pyrophosphatase activity;GO:0097159//organic cyclic compound binding;GO:0003723//RNA binding;GO:0003677//DNA binding;GO:0016818//hydrolase activity, acting on acid anhydrides, in phosphorus-containing anhydrides;GO:0003674//molecular_function;GO:0003824//catalytic activity;GO:0016788//hydrolase activity, acting on ester bonds;GO:0017111//nucleoside-triphosphatase activity;GO:0004518//…	GO:0043043//peptide biosynthetic process;GO:0022607//cellular component assembly;GO:0010467//gene expression;GO:0046483//heterocycle metabolic process;GO:0008219//cell death;GO:0043604//amide biosynthetic process;GO:0022618//ribonucleoprotein complex assembly;GO:0022613//ribonucleoprotein complex biogenesis;GO:0071826//ribonucleoprotein complex subunit organization;GO:0016043//cellular component …
ENSDARG00000001154	22	16	0.71	0.545	-0.381562795	0.309984627	0.550255088	no	rimbp2	PREDICTED: RIMS-binding protein 2 isoform X11 [Danio rerio]	-	-	-	-	-	-	-
ENSDARG00000001162	1260	1333	32.265	32.77	0.022405647	0.721573365	0.90525893	no	matr3l1.1	matrin 3-like 1.1 [Source:ZFIN;Acc:ZDB-GENE-030616-40]	-	-	-	-	-	GO:0003674//molecular_function	-
ENSDARG00000001169	6.5	5	0.635	0.49	-0.373974843	0.738615743	0.918011893	no	hsd17b8	hydroxysteroid (17-beta) dehydrogenase 8 [Source:ZFIN;Acc:ZDB-GENE-010110-1]	-	-	-	-	-	GO:0003674//molecular_function;GO:0003824//catalytic activity;GO:0016491//oxidoreductase activity	GO:0008150//biological_process
ENSDARG00000001210	184	149.5	22.37	18	-0.31356835	0.177828353	0.382614625	no	arl14ep	ADP-ribosylation factor-like 14 effector protein [Source:ZFIN;Acc:ZDB-GENE-060825-216]	-	-	-	-	-	GO:0003677//DNA binding;GO:1901363//heterocyclic compound binding;GO:0097159//organic cyclic compound binding;GO:0003676//nucleic acid binding;GO:0005488//binding;GO:0003674//molecular_function	GO:0008150//biological_process
ENSDARG00000001220	1672	1790.5	12.605	13.425	0.09092597	0.613455965	0.828334292	no	mycbp2	MYC binding protein 2 [Source:ZFIN;Acc:ZDB-GENE-030616-132]	-	-	-	-	GO:0005623//cell;GO:0005575//cellular_component;GO:0044424//intracellular part;GO:0044464//cell part;GO:0005622//intracellular;GO:0005737//cytoplasm	GO:0003674//molecular_function	GO:0044237//cellular metabolic process;GO:0043412//macromolecule modification;GO:0043473//pigmentation;GO:0071840//cellular component organization or biogenesis;GO:0030154//cell differentiation;GO:0019538//protein metabolic process;GO:0006464//cellular protein modification process;GO:0048869//cellular developmental process;GO:0044267//cellular protein metabolic process;GO:0044767//single-organism…
ENSDARG00000001234	57	80.5	2.09	2.91	0.477516211	0.11910294	0.290589797	no	map4k2	mitogen-activated protein kinase kinase kinase kinase 2 [Source:ZFIN;Acc:ZDB-GENE-030616-163]	Environmental Information Processing	Signal transduction	ko04010//MAPK signaling pathway	K04414	GO:0005737//cytoplasm;GO:0044464//cell part;GO:0005622//intracellular;GO:0005623//cell;GO:0005575//cellular_component;GO:0044424//intracellular part	GO:0003824//catalytic activity;GO:0016301//kinase activity;GO:0016772//transferase activity, transferring phosphorus-containing groups;GO:0005488//binding;GO:0004871//signal transducer activity;GO:0016740//transferase activity;GO:0003674//molecular_function;GO:0043167//ion binding	GO:0044237//cellular metabolic process;GO:0000278//mitotic cell cycle;GO:0050794//regulation of cellular process;GO:0023052//signaling;GO:0006464//cellular protein modification process;GO:0007154//cell communication;GO:0006950//response to stress;GO:0044260//cellular macromolecule metabolic process;GO:0044763//single-organism cellular process;GO:0008150//biological_process;GO:0044700//single orga…
ENSDARG00000001241	1675.5	1582.5	99.64	92.31	-0.110238077	0.586476831	0.806757247	no	puf60b	poly-U binding splicing factor b [Source:ZFIN;Acc:ZDB-GENE-040625-116]	-	-	-	-	GO:0005623//cell;GO:0043226//organelle;GO:0044424//intracellular part;GO:0005634//nucleus;GO:0044464//cell part;GO:0043229//intracellular organelle;GO:0043231//intracellular membrane-bounded organelle;GO:0043227//membrane-bounded organelle;GO:0005575//cellular_component;GO:0005622//intracellular	GO:0097159//organic cyclic compound binding;GO:0003676//nucleic acid binding;GO:1901363//heterocyclic compound binding;GO:0005488//binding;GO:0003674//molecular_function;GO:0003723//RNA binding;GO:0003677//DNA binding	GO:0044260//cellular macromolecule metabolic process;GO:0016265//death;GO:0044763//single-organism cellular process;GO:0006725//cellular aromatic compound metabolic process;GO:0043170//macromolecule metabolic process;GO:0044237//cellular metabolic process;GO:0044699//single-organism process;GO:0010467//gene expression;GO:0006807//nitrogen compound metabolic process;GO:0006397//mRNA processing;GO:…
ENSDARG00000001244	1928.5	2062	70.745	76.885	0.120073974	0.620102827	0.83392475	no	srrm1	serine/arginine repetitive matrix 1 [Source:ZFIN;Acc:ZDB-GENE-040426-2789]	Genetic Information Processing	Translation	ko03013//RNA transport;ko03015//mRNA surveillance pathway	K13171	-	-	GO:0090304//nucleic acid metabolic process;GO:0044238//primary metabolic process;GO:0044237//cellular metabolic process;GO:1901360//organic cyclic compound metabolic process;GO:0006807//nitrogen compound metabolic process;GO:0016070//RNA metabolic process;GO:0008150//biological_process;GO:0009987//cellular process;GO:0010467//gene expression;GO:0008152//metabolic process;GO:0034641//cellular nitr…
ENSDARG00000001249	51	66	4.65	5.965	0.359291422	0.205528582	0.422264803	no	pcgf1	PREDICTED: polycomb group RING finger protein 1 isoform X1 [Danio rerio]	-	-	-	-	-	GO:0005488//binding;GO:0043167//ion binding;GO:0043169//cation binding	-
ENSDARG00000001259	10.5	9	1.19	0.96	-0.309855263	0.795411261	0.955484602	no	gas2a	growth arrest-specific 2a [Source:ZFIN;Acc:ZDB-GENE-091013-1]	-	-	-	-	GO:0005622//intracellular;GO:0043228//non-membrane-bounded organelle;GO:0044464//cell part;GO:0005623//cell;GO:0005575//cellular_component;GO:0043232//intracellular non-membrane-bounded organelle;GO:0005856//cytoskeleton;GO:0043226//organelle;GO:0044424//intracellular part;GO:0043229//intracellular organelle	GO:0003674//molecular_function;GO:0005515//protein binding;GO:0005488//binding;GO:0008092//cytoskeletal protein binding	GO:0008150//biological_process;GO:0016265//death;GO:0044763//single-organism cellular process;GO:0044699//single-organism process;GO:0008219//cell death;GO:0009987//cellular process
ENSDARG00000001303	0	2	0.001	0.19	7.569855608	0.151105411	0.341420874	no	psmb8a	proteasome subunit beta 8A [Source:ZFIN;Acc:ZDB-GENE-990415-141]	Genetic Information Processing	Folding, sorting and degradation	ko03050//Proteasome	K02740	GO:0043231//intracellular membrane-bounded organelle;GO:0044464//cell part;GO:0032991//macromolecular complex;GO:0005623//cell;GO:0005737//cytoplasm;GO:0043226//organelle;GO:0043227//membrane-bounded organelle;GO:0043229//intracellular organelle;GO:0005634//nucleus;GO:0005622//intracellular;GO:0044424//intracellular part;GO:0005575//cellular_component;GO:0043234//protein complex	GO:0003674//molecular_function;GO:0003824//catalytic activity;GO:0008233//peptidase activity;GO:0016787//hydrolase activity	GO:0008150//biological_process;GO:0008152//metabolic process;GO:0009056//catabolic process
ENSDARG00000001313	661.5	371.5	22.72	12.645	-0.845395798	1.64E-05	0.000205642	no	g2e3	G2/M-phase specific E3 ubiquitin protein ligase [Source:ZFIN;Acc:ZDB-GENE-030616-400]	-	-	-	-	-	GO:0005488//binding;GO:0043167//ion binding;GO:0003674//molecular_function	GO:0009987//cellular process;GO:0044237//cellular metabolic process;GO:0044260//cellular macromolecule metabolic process;GO:0036211//protein modification process;GO:0008152//metabolic process;GO:0043170//macromolecule metabolic process;GO:0019538//protein metabolic process;GO:0071704//organic substance metabolic process;GO:0043412//macromolecule modification;GO:0044238//primary metabolic process;…
ENSDARG00000001354	28.5	28	1.435	1.555	0.115863843	1	1	no	slc6a22.2	solute carrier family 6 member 22, tandem duplicate 2 [Source:ZFIN;Acc:ZDB-GENE-030616-628]	-	-	-	-	GO:0005575//cellular_component;GO:0044464//cell part;GO:0005623//cell;GO:0005886//plasma membrane;GO:0071944//cell periphery;GO:0016020//membrane	GO:0003674//molecular_function;GO:0022857//transmembrane transporter activity;GO:0005215//transporter activity	GO:0009987//cellular process;GO:0044699//single-organism process;GO:0008150//biological_process;GO:0006810//transport;GO:0051179//localization;GO:0055085//transmembrane transport;GO:0044765//single-organism transport;GO:0051234//establishment of localization;GO:1902578//single-organism localization;GO:0044763//single-organism cellular process
ENSDARG00000001414	83	119	4.375	6.135	0.487780327	0.042904276	0.138399917	no	mctp2a	multiple C2 domains, transmembrane 2a [Source:ZFIN;Acc:ZDB-GENE-040724-63]	-	-	-	-	GO:0043227//membrane-bounded organelle;GO:0005575//cellular_component;GO:0005622//intracellular;GO:0044464//cell part;GO:0044444//cytoplasmic part;GO:0005623//cell;GO:0043226//organelle;GO:0005737//cytoplasm;GO:0043231//intracellular membrane-bounded organelle;GO:0044424//intracellular part;GO:0043229//intracellular organelle;GO:0005783//endoplasmic reticulum;GO:0012505//endomembrane system	-	-
ENSDARG00000001431	4129	4044.5	100.135	97.605	-0.036919365	0.905036766	1	no	actn3b	actinin alpha 3b [Source:ZFIN;Acc:ZDB-GENE-030131-2040]	Cellular Processes	Cell motility;Cellular commiunity	ko04810//Regulation of actin cytoskeleton;ko04510//Focal adhesion;ko04530//Tight junction;ko04520//Adherens junction	K05699	GO:0005575//cellular_component	GO:0008092//cytoskeletal protein binding;GO:0005515//protein binding;GO:0003674//molecular_function;GO:0043167//ion binding;GO:0005488//binding	-
ENSDARG00000001437	60	91.5	3.87	5.85	0.596103058	0.019157235	0.075164631	no	slc2a1a	solute carrier family 2 (facilitated glucose transporter), member 1a [Source:ZFIN;Acc:ZDB-GENE-030131-3158]	Organismal Systems	Endocrine system	ko04920//Adipocytokine signaling pathway	K07299	GO:0005575//cellular_component	GO:0022857//transmembrane transporter activity;GO:0003674//molecular_function;GO:0005215//transporter activity	GO:0030154//cell differentiation;GO:0044763//single-organism cellular process;GO:0048869//cellular developmental process;GO:0009653//anatomical structure morphogenesis;GO:0009987//cellular process;GO:0016265//death;GO:0008150//biological_process;GO:0006810//transport;GO:0048646//anatomical structure formation involved in morphogenesis;GO:0044765//single-organism transport;GO:0032502//developmenta…
ENSDARG00000001442	56	39.5	1.62	1.165	-0.475663858	0.104058418	0.263650663	no	inppl1b	inositol polyphosphate phosphatase-like 1b [Source:ZFIN;Acc:ZDB-GENE-030616-75]	-	-	-	-	-	GO:0003674//molecular_function	GO:0044238//primary metabolic process;GO:0071704//organic substance metabolic process;GO:0008152//metabolic process;GO:0044699//single-organism process;GO:0006629//lipid metabolic process;GO:0008150//biological_process;GO:0044710//single-organism metabolic process
ENSDARG00000001447	234.5	229.5	7.2	6.995	-0.041672849	0.842870867	0.987675402	no	mier1b	mesoderm induction early response 1b, transcriptional regulator [Source:ZFIN;Acc:ZDB-GENE-070705-170]	-	-	-	-	GO:0044424//intracellular part;GO:0005575//cellular_component;GO:0005623//cell;GO:0043229//intracellular organelle;GO:0005622//intracellular;GO:0043227//membrane-bounded organelle;GO:0005634//nucleus;GO:0043226//organelle;GO:0044464//cell part;GO:0043231//intracellular membrane-bounded organelle	GO:0003676//nucleic acid binding;GO:0003677//DNA binding;GO:1901363//heterocyclic compound binding;GO:0005488//binding;GO:0003674//molecular_function;GO:0097159//organic cyclic compound binding;GO:0004871//signal transducer activity	GO:0050789//regulation of biological process;GO:0051716//cellular response to stimulus;GO:0007165//signal transduction;GO:0044699//single-organism process;GO:0050794//regulation of cellular process;GO:0044763//single-organism cellular process;GO:0008150//biological_process;GO:0065007//biological regulation;GO:0007154//cell communication;GO:0009987//cellular process;GO:0050896//response to stimulu…
ENSDARG00000001452	107.5	137	3.82	4.825	0.336956304	0.133743945	0.315153858	no	adam8a	ADAM metallopeptidase domain 8a [Source:ZFIN;Acc:ZDB-GENE-030616-622]	-	-	-	-	GO:0005575//cellular_component	GO:0003674//molecular_function;GO:0016787//hydrolase activity;GO:0008233//peptidase activity;GO:0005488//binding;GO:0005515//protein binding;GO:0043167//ion binding;GO:0019899//enzyme binding;GO:0003824//catalytic activity	GO:0008150//biological_process;GO:0009987//cellular process;GO:0023052//signaling;GO:0044699//single-organism process;GO:0050896//response to stimulus;GO:0044700//single organism signaling;GO:0050794//regulation of cellular process;GO:0007165//signal transduction;GO:0050789//regulation of biological process;GO:0044763//single-organism cellular process;GO:0065007//biological regulation;GO:0051716/…
ENSDARG00000001463	156	32	7.15	1.455	-2.296924089	1.94E-15	1.54E-13	yes	tdh2	L-threonine dehydrogenase 2 [Source:ZFIN;Acc:ZDB-GENE-070620-14]	-	-	-	-	GO:0005575//cellular_component	GO:0003674//molecular_function	-
ENSDARG00000001470	24	40.5	1.355	2.305	0.766473899	0.032334291	0.111822417	no	mhc1zea	major histocompatibility complex class I ZEA [Source:ZFIN;Acc:ZDB-GENE-070705-176]	-	-	-	-	GO:0016020//membrane;GO:0005575//cellular_component;GO:0005886//plasma membrane;GO:0071944//cell periphery;GO:0044464//cell part;GO:0005623//cell	-	-
ENSDARG00000001498	12.5	7.5	0.495	0.295	-0.746713571	0.239086892	0.46959842	no	skap1	src kinase associated phosphoprotein 1 [Source:ZFIN;Acc:ZDB-GENE-090721-1]	-	-	-	-	GO:0005623//cell;GO:0016020//membrane;GO:0005622//intracellular;GO:0044464//cell part;GO:0005575//cellular_component;GO:0005886//plasma membrane;GO:0044424//intracellular part;GO:0071944//cell periphery;GO:0005737//cytoplasm	GO:0060090//binding, bridging;GO:0005515//protein binding;GO:0003674//molecular_function;GO:0005488//binding;GO:0030674//protein binding, bridging	GO:0050896//response to stimulus;GO:0050789//regulation of biological process;GO:0044763//single-organism cellular process;GO:0002376//immune system process;GO:0044700//single organism signaling;GO:0065007//biological regulation;GO:0008150//biological_process;GO:0051716//cellular response to stimulus;GO:0007165//signal transduction;GO:0050794//regulation of cellular process;GO:0009987//cellular p…
ENSDARG00000001549	146.5	177.5	13.06	23.185	0.82803683	0.224212812	0.44828995	no	sp3a	sp3a transcription factor [Source:ZFIN;Acc:ZDB-GENE-070410-111]	-	-	-	-	GO:0043227//membrane-bounded organelle;GO:0005623//cell;GO:0043229//intracellular organelle;GO:0005622//intracellular;GO:0043226//organelle;GO:0043231//intracellular membrane-bounded organelle;GO:0044424//intracellular part;GO:0044464//cell part;GO:0005575//cellular_component;GO:0005634//nucleus	GO:0003700//transcription factor activity, sequence-specific DNA binding;GO:0003677//DNA binding;GO:0003674//molecular_function;GO:0003676//nucleic acid binding;GO:0005488//binding;GO:1901363//heterocyclic compound binding;GO:0097159//organic cyclic compound binding;GO:0001071//nucleic acid binding transcription factor activity	GO:0009058//biosynthetic process;GO:0044237//cellular metabolic process;GO:0008152//metabolic process;GO:0009987//cellular process;GO:0034641//cellular nitrogen compound metabolic process;GO:0008150//biological_process;GO:0006807//nitrogen compound metabolic process
ENSDARG00000001557	290.5	491	17.415	28.95	0.733232875	0.000798586	0.005839248	no	tomm34	mitochondrial import receptor subunit TOM34 [Danio rerio]	-	-	-	-	-	-	-
ENSDARG00000001558	1412	950.5	73.365	51.26	-0.517258487	0.001020076	0.007138047	no	kifc1	kinesin family member C1 [Source:ZFIN;Acc:ZDB-GENE-000208-21]	-	-	-	-	GO:0044464//cell part;GO:0044424//intracellular part;GO:0005622//intracellular;GO:0043232//intracellular non-membrane-bounded organelle;GO:0043234//protein complex;GO:0032991//macromolecular complex;GO:0005623//cell;GO:0005575//cellular_component;GO:0043229//intracellular organelle;GO:0005856//cytoskeleton;GO:0043228//non-membrane-bounded organelle;GO:0043226//organelle	GO:0017111//nucleoside-triphosphatase activity;GO:0016887//ATPase activity;GO:0003824//catalytic activity;GO:0005515//protein binding;GO:0016462//pyrophosphatase activity;GO:0016787//hydrolase activity;GO:0008092//cytoskeletal protein binding;GO:0016818//hydrolase activity, acting on acid anhydrides, in phosphorus-containing anhydrides;GO:0043167//ion binding;GO:0003674//molecular_function;GO:001…	GO:0008150//biological_process
ENSDARG00000001559	65	40.5	1.19	0.435	-1.451874267	0.022411088	0.084953314	no	csmd2	CUB and Sushi multiple domains 2 [Source:ZFIN;Acc:ZDB-GENE-030616-39]	-	-	-	-	GO:0005575//cellular_component	-	-
ENSDARG00000001572	0	0	0.001	0.001	0	1	1	notest	prf1.3	perforin 1.3 [Source:ZFIN;Acc:ZDB-GENE-060503-461]	-	-	-	-	-	GO:0005488//binding;GO:0043167//ion binding;GO:0003674//molecular_function	GO:0008150//biological_process
ENSDARG00000001578	519	482.5	42.205	38.94	-0.11616104	0.514467765	0.752470776	no	echs1	enoyl CoA hydratase, short chain, 1, mitochondrial [Source:ZFIN;Acc:ZDB-GENE-030616-617]	Metabolism	Lipid metabolism;Carbohydrate metabolism;Global and Overview;Metabolism of other amino acids;Amino acid metabolism	ko01200//Carbon metabolism;ko01212//Fatty acid metabolism;ko00310//Lysine degradation;ko00280//Valine, leucine and isoleucine degradation;ko00380//Tryptophan metabolism;ko00071//Fatty acid degradation;ko00062//Fatty acid elongation;ko00640//Propanoate metabolism;ko00410//beta-Alanine metabolism;ko00650//Butanoate metabolism	K07511	GO:0005575//cellular_component;GO:0005737//cytoplasm;GO:0044424//intracellular part;GO:0043229//intracellular organelle;GO:0044444//cytoplasmic part;GO:0005739//mitochondrion;GO:0043231//intracellular membrane-bounded organelle;GO:0044464//cell part;GO:0005623//cell;GO:0043226//organelle;GO:0005622//intracellular;GO:0043227//membrane-bounded organelle	GO:0003674//molecular_function;GO:0016829//lyase activity;GO:0003824//catalytic activity	GO:0044238//primary metabolic process;GO:0044281//small molecule metabolic process;GO:0008150//biological_process;GO:0044710//single-organism metabolic process;GO:0009056//catabolic process;GO:0044699//single-organism process;GO:0071704//organic substance metabolic process;GO:0008152//metabolic process;GO:0006629//lipid metabolic process
ENSDARG00000001621	155.185	208.925	9.43	11.165	0.243653575	0.09531399	0.247228069	no	nfyal	nuclear transcription factor Y, alpha, like [Source:ZFIN;Acc:ZDB-GENE-040718-491]	-	-	-	-	GO:0005623//cell;GO:0043227//membrane-bounded organelle;GO:0032991//macromolecular complex;GO:0043229//intracellular organelle;GO:0005575//cellular_component;GO:0043231//intracellular membrane-bounded organelle;GO:0043226//organelle;GO:0005622//intracellular;GO:0044464//cell part;GO:0005634//nucleus;GO:0044424//intracellular part;GO:0043234//protein complex	GO:0005488//binding;GO:0001071//nucleic acid binding transcription factor activity;GO:1901363//heterocyclic compound binding;GO:0003700//transcription factor activity, sequence-specific DNA binding;GO:0003674//molecular_function;GO:0003676//nucleic acid binding;GO:0097159//organic cyclic compound binding;GO:0003677//DNA binding	GO:0006807//nitrogen compound metabolic process;GO:0009058//biosynthetic process;GO:0044237//cellular metabolic process;GO:0008152//metabolic process;GO:0034641//cellular nitrogen compound metabolic process;GO:0009987//cellular process;GO:0008150//biological_process
ENSDARG00000001634	346	294.5	5.97	4.865	-0.295291126	0.265615461	0.50264303	no	kirrel1a	kirre like nephrin family adhesion molecule 1a [Source:ZFIN;Acc:ZDB-GENE-040426-2126]	-	-	-	-	GO:0005575//cellular_component	GO:0003674//molecular_function	-
ENSDARG00000001656	1	1.5	0.105	0.16	0.607682577	1	1	no	psmb13a	proteasome subunit beta 13a [Source:ZFIN;Acc:ZDB-GENE-001208-2]	Genetic Information Processing	Folding, sorting and degradation	ko03050//Proteasome	K02739	GO:0005634//nucleus;GO:0043229//intracellular organelle;GO:0043227//membrane-bounded organelle;GO:0005622//intracellular;GO:0043231//intracellular membrane-bounded organelle;GO:0005575//cellular_component;GO:0005737//cytoplasm;GO:0043234//protein complex;GO:0032991//macromolecular complex;GO:0044424//intracellular part;GO:0044464//cell part;GO:0043226//organelle;GO:0005623//cell	GO:0008233//peptidase activity;GO:0016787//hydrolase activity;GO:0003674//molecular_function;GO:0003824//catalytic activity	GO:0008152//metabolic process;GO:0009056//catabolic process;GO:0008150//biological_process
ENSDARG00000001676	694.5	274	49.8	19.405	-1.359717309	5.70E-13	3.01E-11	yes	gpm6bb	glycoprotein M6Bb [Source:ZFIN;Acc:ZDB-GENE-030710-10]	-	-	-	-	GO:0005575//cellular_component	-	-
ENSDARG00000001686	6	15	0.34	0.85	1.321928095	0.028172564	0.100892692	no	uckl1a	uridine-cytidine kinase 1-like 1a [Source:ZFIN;Acc:ZDB-GENE-040724-238]	-	-	-	-	GO:0005623//cell;GO:0005737//cytoplasm;GO:0005575//cellular_component;GO:0005622//intracellular;GO:0044444//cytoplasmic part;GO:0005829//cytosol;GO:0044464//cell part;GO:0044424//intracellular part	GO:0016740//transferase activity;GO:0005488//binding;GO:0003824//catalytic activity;GO:0003674//molecular_function;GO:0043167//ion binding;GO:0016772//transferase activity, transferring phosphorus-containing groups;GO:0016301//kinase activity	GO:0009987//cellular process;GO:0008150//biological_process;GO:0034641//cellular nitrogen compound metabolic process;GO:0006807//nitrogen compound metabolic process;GO:0044699//single-organism process;GO:0008152//metabolic process;GO:0044281//small molecule metabolic process;GO:0044237//cellular metabolic process;GO:0009058//biosynthetic process;GO:0044710//single-organism metabolic process
ENSDARG00000001710	828	522.5	44.38	29.86	-0.571695502	0.000161336	0.001504816	no	flot1a	flotillin 1a [Danio rerio]	Organismal Systems	Endocrine system	ko04910//Insulin signaling pathway	K07192	-	-	-
ENSDARG00000001712	19	39	0.775	1.64	1.081427599	0.016546756	0.067137987	no	si:ch211-247n2.1	si:ch211-247n2.1 [Source:ZFIN;Acc:ZDB-GENE-141216-101]	Organismal Systems	Circulatory system	ko04270//Vascular smooth muscle contraction	K04938	GO:0005623//cell;GO:0005886//plasma membrane;GO:0044464//cell part;GO:0071944//cell periphery;GO:0005575//cellular_component;GO:0016020//membrane	GO:0022857//transmembrane transporter activity;GO:0003674//molecular_function;GO:0005215//transporter activity	GO:0007154//cell communication;GO:0051179//localization;GO:0008150//biological_process;GO:1902578//single-organism localization;GO:0044763//single-organism cellular process;GO:0044699//single-organism process;GO:0044700//single organism signaling;GO:0044765//single-organism transport;GO:0009987//cellular process;GO:0006810//transport;GO:0023052//signaling;GO:0051234//establishment of localization…
ENSDARG00000001721	426	1224	15.165	43.29	1.513288303	3.85E-15	2.89E-13	yes	oc90	otoconin 90 [Source:ZFIN;Acc:ZDB-GENE-070912-300]	-	-	-	-	GO:0005576//extracellular region;GO:0005575//cellular_component	GO:0043167//ion binding;GO:0003674//molecular_function;GO:0005488//binding	GO:0071704//organic substance metabolic process;GO:0008150//biological_process;GO:0044699//single-organism process;GO:0009056//catabolic process;GO:0032502//developmental process;GO:0006629//lipid metabolic process;GO:0006810//transport;GO:0051179//localization;GO:0044238//primary metabolic process;GO:0048856//anatomical structure development;GO:0044710//single-organism metabolic process;GO:00081…
ENSDARG00000001729	942	1264.5	26.81	35.755	0.415373784	0.016853953	0.068076616	no	strn3	PREDICTED: striatin-3 isoform X1 [Danio rerio]	-	-	-	-	-	-	-
ENSDARG00000001733	96	106	5.835	6.495	0.15459687	0.605760896	0.822729002	no	gulp1a	GULP, engulfment adaptor PTB domain containing 1a [Source:ZFIN;Acc:ZDB-GENE-030616-21]	-	-	-	-	GO:0005623//cell;GO:0005622//intracellular;GO:0044464//cell part;GO:0005737//cytoplasm;GO:0044424//intracellular part;GO:0005575//cellular_component	-	GO:0051179//localization;GO:0051234//establishment of localization;GO:0006810//transport;GO:0009987//cellular process;GO:0016192//vesicle-mediated transport;GO:0044699//single-organism process;GO:0008150//biological_process;GO:0044763//single-organism cellular process;GO:0016265//death;GO:0008219//cell death
ENSDARG00000001734	171.5	221	9.305	11.795	0.342097363	0.272543313	0.51099308	no	fkbp8	FK506 binding protein 8 [Source:ZFIN;Acc:ZDB-GENE-040426-1849]	-	-	-	-	GO:0005623//cell;GO:0044464//cell part;GO:0044424//intracellular part;GO:0005575//cellular_component;GO:0005622//intracellular;GO:0005737//cytoplasm	GO:0003824//catalytic activity;GO:0016853//isomerase activity;GO:0003674//molecular_function	GO:0019538//protein metabolic process;GO:0006457//protein folding;GO:0009987//cellular process;GO:0043412//macromolecule modification;GO:0071704//organic substance metabolic process;GO:0043170//macromolecule metabolic process;GO:0044238//primary metabolic process;GO:0044260//cellular macromolecule metabolic process;GO:0044267//cellular protein metabolic process;GO:0036211//protein modification pr…
ENSDARG00000001754	255	702	10.2	27.795	1.44625623	1.47E-14	9.99E-13	yes	noc2l	NOC2-like nucleolar associated transcriptional repressor [Source:ZFIN;Acc:ZDB-GENE-000607-75]	-	-	-	-	GO:0043228//non-membrane-bounded organelle;GO:0005575//cellular_component;GO:0005623//cell;GO:0043234//protein complex;GO:0044464//cell part;GO:0070013//intracellular organelle lumen;GO:0031974//membrane-enclosed lumen;GO:0043232//intracellular non-membrane-bounded organelle;GO:0044422//organelle part;GO:0043231//intracellular membrane-bounded organelle;GO:0043227//membrane-bounded organelle;GO:0…	GO:0003674//molecular_function;GO:0000988//transcription factor activity, protein binding;GO:0005488//binding;GO:0042393//histone binding;GO:0005515//protein binding;GO:0008134//transcription factor binding	GO:0008150//biological_process;GO:0006996//organelle organization;GO:0009058//biosynthetic process;GO:0044260//cellular macromolecule metabolic process;GO:0008152//metabolic process;GO:0016043//cellular component organization;GO:0009987//cellular process;GO:0051276//chromosome organization;GO:0043412//macromolecule modification;GO:0019538//protein metabolic process;GO:0036211//protein modificatio…
ENSDARG00000001760	3.5	7.5	0.105	0.215	1.033947332	0.193397007	0.404816274	no	tnxba	tenascin XBa [Source:ZFIN;Acc:ZDB-GENE-070103-5]	-	-	-	-	GO:0005578//proteinaceous extracellular matrix;GO:0005575//cellular_component;GO:0031012//extracellular matrix;GO:0044421//extracellular region part;GO:0005576//extracellular region	-	GO:0030198//extracellular matrix organization;GO:0016043//cellular component organization;GO:0009987//cellular process;GO:0044763//single-organism cellular process;GO:0071840//cellular component organization or biogenesis;GO:0043062//extracellular structure organization;GO:0008150//biological_process;GO:0044699//single-organism process
ENSDARG00000001767	250	138	13.555	7.41	-0.871279666	0.000659433	0.004970658	no	slc29a2	solute carrier family 29 (equilibrative nucleoside transporter), member 2 [Source:ZFIN;Acc:ZDB-GENE-050220-15]	-	-	-	-	GO:0016020//membrane;GO:0005623//cell;GO:0071944//cell periphery;GO:0044464//cell part;GO:0005886//plasma membrane;GO:0005575//cellular_component	GO:0005215//transporter activity;GO:0003674//molecular_function;GO:0022857//transmembrane transporter activity	GO:0006810//transport;GO:0051234//establishment of localization;GO:0055085//transmembrane transport;GO:0044699//single-organism process;GO:0051179//localization;GO:0009987//cellular process;GO:0008150//biological_process;GO:1902578//single-organism localization;GO:0044763//single-organism cellular process;GO:0044765//single-organism transport
ENSDARG00000001769	593.5	618.5	19.76	20.56	0.057257318	0.781535962	0.946147979	no	ptpra	protein tyrosine phosphatase, receptor type, A [Source:ZFIN;Acc:ZDB-GENE-020107-1]	-	-	-	-	GO:0005575//cellular_component	GO:0016788//hydrolase activity, acting on ester bonds;GO:0016791//phosphatase activity;GO:0003824//catalytic activity;GO:0016787//hydrolase activity;GO:0042578//phosphoric ester hydrolase activity;GO:0003674//molecular_function	GO:0007275//multicellular organism development;GO:0032502//developmental process;GO:0044767//single-organism developmental process;GO:0019538//protein metabolic process;GO:0044699//single-organism process;GO:0036211//protein modification process;GO:0043170//macromolecule metabolic process;GO:0044267//cellular protein metabolic process;GO:0044260//cellular macromolecule metabolic process;GO:004423…
ENSDARG00000001771	0	0.5	0.001	0.04	5.321928095	1	1	no	otol1a	otolin 1a [Source:ZFIN;Acc:ZDB-GENE-050707-1]	-	-	-	-	GO:0032991//macromolecular complex;GO:0005576//extracellular region;GO:0043234//protein complex;GO:0005575//cellular_component	-	GO:0008150//biological_process;GO:0032502//developmental process;GO:0048856//anatomical structure development
ENSDARG00000001776	55	46	1.425	1.18	-0.27217506	0.449553772	0.693166541	no	stim2b	stromal interaction molecule 2b [Source:ZFIN;Acc:ZDB-GENE-120404-3]	Environmental Information Processing	Signal transduction	ko04020//Calcium signaling pathway	K18196	GO:0005886//plasma membrane;GO:0044444//cytoplasmic part;GO:0005622//intracellular;GO:0043226//organelle;GO:0044424//intracellular part;GO:0044464//cell part;GO:0071944//cell periphery;GO:0012505//endomembrane system;GO:0043229//intracellular organelle;GO:0005783//endoplasmic reticulum;GO:0016020//membrane;GO:0005623//cell;GO:0043231//intracellular membrane-bounded organelle;GO:0005737//cytoplasm…	GO:0005488//binding;GO:0003674//molecular_function;GO:0043167//ion binding	GO:0055085//transmembrane transport;GO:0044699//single-organism process;GO:0051234//establishment of localization;GO:0042592//homeostatic process;GO:1902578//single-organism localization;GO:0006810//transport;GO:0065007//biological regulation;GO:0065008//regulation of biological quality;GO:0008150//biological_process;GO:0044765//single-organism transport;GO:0009987//cellular process;GO:0051179//l…
ENSDARG00000001777	852	1117	22.55	29.29	0.37728076	0.02974787	0.105244181	no	nup155	nucleoporin 155 [Source:ZFIN;Acc:ZDB-GENE-040426-711]	Genetic Information Processing	Translation	ko03013//RNA transport	K14312	GO:0005635//nuclear envelope;GO:0005623//cell;GO:0043226//organelle;GO:0044446//intracellular organelle part;GO:0005634//nucleus;GO:0043234//protein complex;GO:0044422//organelle part;GO:0043227//membrane-bounded organelle;GO:0032991//macromolecular complex;GO:0044424//intracellular part;GO:0044428//nuclear part;GO:0043231//intracellular membrane-bounded organelle;GO:0044464//cell part;GO:0031975…	GO:0003674//molecular_function;GO:0005198//structural molecule activity	GO:0016043//cellular component organization;GO:0051234//establishment of localization;GO:0033036//macromolecule localization;GO:0034613//cellular protein localization;GO:0006913//nucleocytoplasmic transport;GO:0006605//protein targeting;GO:0051169//nuclear transport;GO:0006886//intracellular protein transport;GO:0071840//cellular component organization or biogenesis;GO:0006810//transport;GO:00150…
ENSDARG00000001781	33.5	64.5	3.255	5.915	0.861720625	0.004689995	0.024664667	no	tspan11	tetraspanin 11 [Source:ZFIN;Acc:ZDB-GENE-041210-93]	-	-	-	-	GO:0016020//membrane;GO:0005623//cell;GO:0005886//plasma membrane;GO:0071944//cell periphery;GO:0005575//cellular_component;GO:0044464//cell part	-	GO:0044700//single organism signaling;GO:0009987//cellular process;GO:0023052//signaling;GO:0044699//single-organism process;GO:0051716//cellular response to stimulus;GO:0050794//regulation of cellular process;GO:0007154//cell communication;GO:0044763//single-organism cellular process;GO:0008150//biological_process;GO:0007165//signal transduction;GO:0050896//response to stimulus;GO:0065007//biolo…
ENSDARG00000001782	106.5	200.5	5.725	10.81	0.917018925	9.62E-05	0.000964393	no	prkacba	protein kinase, cAMP-dependent, catalytic, beta a [Source:ZFIN;Acc:ZDB-GENE-040426-1351]	Organismal Systems;Environmental Information Processing;Cellular Processes	Cellular commiunity;Endocrine system;Cell growth and death;Signal transduction;Circulatory system	ko04010//MAPK signaling pathway;ko04020//Calcium signaling pathway;ko04261//Adrenergic signaling in cardiomyocytes;ko04910//Insulin signaling pathway;ko04310//Wnt signaling pathway;ko04270//Vascular smooth muscle contraction;ko04916//Melanogenesis;ko04114//Oocyte meiosis;ko04540//Gap junction;ko04912//GnRH signaling pathway;ko04914//Progesterone-mediated oocyte maturation;ko04210//Apoptosis;ko043…	K04345	GO:0005575//cellular_component	GO:0043167//ion binding;GO:0016740//transferase activity;GO:0016772//transferase activity, transferring phosphorus-containing groups;GO:0005488//binding;GO:0003674//molecular_function;GO:0016301//kinase activity;GO:0003824//catalytic activity	GO:0019538//protein metabolic process;GO:0043412//macromolecule modification;GO:0009987//cellular process;GO:0043170//macromolecule metabolic process;GO:0044267//cellular protein metabolic process;GO:0006464//cellular protein modification process;GO:0036211//protein modification process;GO:0044260//cellular macromolecule metabolic process;GO:0008152//metabolic process;GO:0044237//cellular metabol…
ENSDARG00000001785	231	97.5	11.25	4.705	-1.257658373	2.02E-07	3.95E-06	yes	irx2a	iroquois homeobox 2a [Source:ZFIN;Acc:ZDB-GENE-040426-1446]	-	-	-	-	GO:0043231//intracellular membrane-bounded organelle;GO:0044424//intracellular part;GO:0043227//membrane-bounded organelle;GO:0043229//intracellular organelle;GO:0005623//cell;GO:0044464//cell part;GO:0005622//intracellular;GO:0005575//cellular_component;GO:0005634//nucleus;GO:0043226//organelle	GO:0003674//molecular_function;GO:0003676//nucleic acid binding;GO:1901363//heterocyclic compound binding;GO:0005488//binding;GO:0003677//DNA binding;GO:0097159//organic cyclic compound binding	GO:0034641//cellular nitrogen compound metabolic process;GO:0008152//metabolic process;GO:0008150//biological_process;GO:0032502//developmental process;GO:0006807//nitrogen compound metabolic process;GO:0048856//anatomical structure development;GO:0009987//cellular process;GO:0044237//cellular metabolic process;GO:0009058//biosynthetic process
ENSDARG00000001788	2038	1967	283.875	272.105	-0.061092334	0.728064026	0.910873995	no	atp5po	ATP synthase peripheral stalk subunit OSCP [Source:ZFIN;Acc:ZDB-GENE-050522-147]	Metabolism	Energy metabolism	ko00190//Oxidative phosphorylation	K02137	-	GO:0003674//molecular_function;GO:0016787//hydrolase activity;GO:0016818//hydrolase activity, acting on acid anhydrides, in phosphorus-containing anhydrides;GO:0003824//catalytic activity;GO:0016887//ATPase activity;GO:0022857//transmembrane transporter activity;GO:0016462//pyrophosphatase activity;GO:0017111//nucleoside-triphosphatase activity;GO:0016817//hydrolase activity, acting on acid anhyd…	GO:0008152//metabolic process;GO:0044281//small molecule metabolic process;GO:0034641//cellular nitrogen compound metabolic process;GO:0044699//single-organism process;GO:0051179//localization;GO:0044237//cellular metabolic process;GO:0055085//transmembrane transport;GO:0009058//biosynthetic process;GO:0051234//establishment of localization;GO:0008150//biological_process;GO:1902578//single-organi…
ENSDARG00000001803	33.5	46.5	0.825	1.12	0.441032708	0.141689707	0.32882273	no	kcnh6a	potassium voltage-gated channel, subfamily H (eag-related), member 6a [Source:ZFIN;Acc:ZDB-GENE-040702-5]	-	-	-	-	GO:0071944//cell periphery;GO:0016020//membrane;GO:0005575//cellular_component;GO:0044464//cell part;GO:0005886//plasma membrane;GO:0005623//cell	GO:0005215//transporter activity;GO:0022857//transmembrane transporter activity;GO:0003674//molecular_function	GO:0032501//multicellular organismal process;GO:0051179//localization;GO:0008150//biological_process;GO:0009987//cellular process;GO:0044699//single-organism process;GO:0006810//transport;GO:0051234//establishment of localization;GO:0044763//single-organism cellular process;GO:0003013//circulatory system process;GO:1902578//single-organism localization;GO:0055085//transmembrane transport;GO:00030…
ENSDARG00000001804	22.5	25.5	3.08	3.45	0.163666011	0.723650942	0.906935267	no	zgc:112148	zgc:112148 [Source:ZFIN;Acc:ZDB-GENE-050417-235]	-	-	-	-	GO:0044444//cytoplasmic part;GO:0043229//intracellular organelle;GO:0043227//membrane-bounded organelle;GO:0012505//endomembrane system;GO:0005794//Golgi apparatus;GO:0005622//intracellular;GO:0005737//cytoplasm;GO:0005575//cellular_component;GO:0005623//cell;GO:0044424//intracellular part;GO:0043231//intracellular membrane-bounded organelle;GO:0043226//organelle;GO:0044464//cell part	GO:0003674//molecular_function	GO:0051179//localization;GO:0051234//establishment of localization;GO:0008150//biological_process;GO:0016192//vesicle-mediated transport;GO:0006810//transport
ENSDARG00000001807	66.5	146.5	1.585	3.455	1.12420287	3.02E-06	4.52E-05	yes	tnfrsf21	tumor necrosis factor receptor superfamily, member 21 [Source:ZFIN;Acc:ZDB-GENE-030131-5971]	-	-	-	-	GO:0005623//cell;GO:0044464//cell part;GO:0005575//cellular_component;GO:0016020//membrane;GO:0071944//cell periphery;GO:0005886//plasma membrane	GO:0004871//signal transducer activity;GO:0003674//molecular_function	GO:0006950//response to stress;GO:0050896//response to stimulus;GO:0048646//anatomical structure formation involved in morphogenesis;GO:0044763//single-organism cellular process;GO:0008283//cell proliferation;GO:0050789//regulation of biological process;GO:0065007//biological regulation;GO:0051716//cellular response to stimulus;GO:0016265//death;GO:0009987//cellular process;GO:0032502//developmen…
ENSDARG00000001817	6.5	5	1.125	0.86	-0.387516437	0.737173669	0.917155027	no	zmp:0000000521	zmp:0000000521 [Source:ZFIN;Acc:ZDB-GENE-130530-524]	-	-	-	-	-	-	GO:0000003//reproduction;GO:0008150//biological_process
ENSDARG00000001818	187.65	99.865	3.78	2	-0.918386234	1.90E-05	0.000233347	no	c3b.2	complement component c3b, tandem duplicate 2 [Source:ZFIN;Acc:ZDB-GENE-030131-3063]	-	-	-	-	GO:0044421//extracellular region part;GO:0005615//extracellular space;GO:0005576//extracellular region;GO:0005575//cellular_component	GO:0003674//molecular_function;GO:0030234//enzyme regulator activity;GO:0098772//molecular function regulator	GO:0002376//immune system process;GO:0008150//biological_process
ENSDARG00000001825	23.585	51.1	0.535	1.15	1.104023065	0.001325061	0.008851101	yes	cfap43	PREDICTED: cilia- and flagella-associated protein 43 [Danio rerio]	-	-	-	-	-	-	-
ENSDARG00000001829	817.04	957.26	33.605	38.925	0.212021136	0.217795703	0.439460989	no	zgc:112982	zgc:112982 [Source:ZFIN;Acc:ZDB-GENE-050306-55]	-	-	-	-	GO:0005575//cellular_component	GO:0003674//molecular_function	-
ENSDARG00000001835	134	100	4.465	3.31	-0.431828958	0.079637992	0.217483187	no	nalcn	sodium leak channel, non-selective [Source:ZFIN;Acc:ZDB-GENE-050410-12]	-	-	-	-	GO:0005623//cell;GO:0005575//cellular_component;GO:0044464//cell part;GO:0016020//membrane;GO:0005886//plasma membrane;GO:0071944//cell periphery	GO:0022857//transmembrane transporter activity;GO:0003674//molecular_function;GO:0005215//transporter activity	GO:0044699//single-organism process;GO:0044763//single-organism cellular process;GO:0051234//establishment of localization;GO:0008150//biological_process;GO:0006810//transport;GO:0009987//cellular process;GO:0051179//localization;GO:0055085//transmembrane transport;GO:1902578//single-organism localization;GO:0044765//single-organism transport
ENSDARG00000001857	530	418	20.17	14.355	-0.490657753	0.100680293	0.257221838	no	aff4	PREDICTED: AF4/FMR2 family member 4 isoform X2 [Danio rerio]	-	-	-	-	-	-	-
ENSDARG00000001859	241.5	243.5	19.89	19.895	0.000362623	1	1	no	dbx1b	developing brain homeobox 1b [Source:ZFIN;Acc:ZDB-GENE-000128-11]	-	-	-	-	GO:0043229//intracellular organelle;GO:0043231//intracellular membrane-bounded organelle;GO:0043227//membrane-bounded organelle;GO:0005575//cellular_component;GO:0005623//cell;GO:0005622//intracellular;GO:0044464//cell part;GO:0005634//nucleus;GO:0044424//intracellular part;GO:0043226//organelle	GO:0003674//molecular_function;GO:0005488//binding;GO:0003676//nucleic acid binding;GO:0097159//organic cyclic compound binding;GO:1901363//heterocyclic compound binding;GO:0003677//DNA binding	GO:0009058//biosynthetic process;GO:0008152//metabolic process;GO:0006807//nitrogen compound metabolic process;GO:0044237//cellular metabolic process;GO:0009987//cellular process;GO:0008150//biological_process;GO:0034641//cellular nitrogen compound metabolic process
ENSDARG00000001870	882.66	1337.88	31.42	47.24	0.588325784	0.000722098	0.005370678	no	atp1a1a.4	ATPase Na+/K+ transporting subunit alpha 1a, tandem duplicate 4 [Source:ZFIN;Acc:ZDB-GENE-001212-4]	-	-	-	-	GO:0005575//cellular_component	GO:0003674//molecular_function;GO:0016817//hydrolase activity, acting on acid anhydrides;GO:0016787//hydrolase activity;GO:0043167//ion binding;GO:0016818//hydrolase activity, acting on acid anhydrides, in phosphorus-containing anhydrides;GO:0016887//ATPase activity;GO:0022857//transmembrane transporter activity;GO:0016462//pyrophosphatase activity;GO:0005488//binding;GO:0005215//transporter acti…	GO:0051234//establishment of localization;GO:1902578//single-organism localization;GO:0044699//single-organism process;GO:0044763//single-organism cellular process;GO:0009987//cellular process;GO:0008150//biological_process;GO:0044765//single-organism transport;GO:0055085//transmembrane transport;GO:0051179//localization;GO:0006810//transport
ENSDARG00000001873	702.5	469.5	34.25	22.62	-0.598505059	0.003000241	0.017246998	no	phgdh	phosphoglycerate dehydrogenase [Source:ZFIN;Acc:ZDB-GENE-030131-647]	Metabolism	Amino acid metabolism;Global and Overview	ko01200//Carbon metabolism;ko01230//Biosynthesis of amino acids;ko00260//Glycine, serine and threonine metabolism	K00058	GO:0005575//cellular_component	GO:0003674//molecular_function;GO:0016491//oxidoreductase activity;GO:0003824//catalytic activity	GO:1901564//organonitrogen compound metabolic process;GO:0019752//carboxylic acid metabolic process;GO:0008152//metabolic process;GO:0044710//single-organism metabolic process;GO:0006082//organic acid metabolic process;GO:0043436//oxoacid metabolic process;GO:0008150//biological_process;GO:0009987//cellular process;GO:0006807//nitrogen compound metabolic process;GO:0071704//organic substance meta…
ENSDARG00000001879	524	621.5	7.41	8.75	0.239809474	0.218948938	0.441083671	no	nav2b	neuron navigator 2b [Source:ZFIN;Acc:ZDB-GENE-061207-13]	-	-	-	-	GO:0005575//cellular_component	GO:0003674//molecular_function;GO:0005488//binding;GO:0043167//ion binding	GO:0008150//biological_process
ENSDARG00000001880	71.5	87	4.44	4.875	0.134842542	0.287500771	0.526767164	no	stx3a	syntaxin 3A [Source:ZFIN;Acc:ZDB-GENE-040426-1489]	Genetic Information Processing	Folding, sorting and degradation	ko04130//SNARE interactions in vesicular transport	K08486	GO:0005623//cell;GO:0016020//membrane;GO:0031410//cytoplasmic vesicle;GO:0044424//intracellular part;GO:0071944//cell periphery;GO:0031982//vesicle;GO:0044444//cytoplasmic part;GO:0032991//macromolecular complex;GO:0043226//organelle;GO:0005886//plasma membrane;GO:0043234//protein complex;GO:0005622//intracellular;GO:0043229//intracellular organelle;GO:0044464//cell part;GO:0005737//cytoplasm;GO:…	GO:0003674//molecular_function	GO:0007154//cell communication;GO:0051179//localization;GO:0044763//single-organism cellular process;GO:0051234//establishment of localization;GO:0044700//single organism signaling;GO:0008150//biological_process;GO:0009987//cellular process;GO:0016192//vesicle-mediated transport;GO:0071840//cellular component organization or biogenesis;GO:0061024//membrane organization;GO:0044699//single-organism…
ENSDARG00000001881	7.5	2.5	0.395	0.13	-1.60334103	0.065814617	0.189213931	no	cacnb3a	calcium channel, voltage-dependent, beta 3a [Source:ZFIN;Acc:ZDB-GENE-060221-2]	Environmental Information Processing;Organismal Systems	Signal transduction;Circulatory system	ko04010//MAPK signaling pathway;ko04261//Adrenergic signaling in cardiomyocytes;ko04260//Cardiac muscle contraction	K04864	GO:0005623//cell;GO:0016020//membrane;GO:0071944//cell periphery;GO:0005886//plasma membrane;GO:0044464//cell part;GO:0005575//cellular_component	GO:0003674//molecular_function;GO:0005215//transporter activity;GO:0022857//transmembrane transporter activity	GO:0044700//single organism signaling;GO:0023052//signaling;GO:0007154//cell communication;GO:0051234//establishment of localization;GO:0044765//single-organism transport;GO:1902578//single-organism localization;GO:0009987//cellular process;GO:0051179//localization;GO:0055085//transmembrane transport;GO:0008150//biological_process;GO:0007267//cell-cell signaling;GO:0006810//transport;GO:0044763//…
ENSDARG00000001882	77.785	108.5	3.065	3.825	0.319572674	0.096582236	0.249693986	no	kbtbd12	kelch repeat and BTB (POZ) domain containing 12 [Source:ZFIN;Acc:ZDB-GENE-050904-1]	-	-	-	-	GO:0005622//intracellular;GO:0005575//cellular_component;GO:0005623//cell;GO:0044464//cell part	GO:0003674//molecular_function	GO:0008152//metabolic process;GO:0019538//protein metabolic process;GO:0006464//cellular protein modification process;GO:0009987//cellular process;GO:0071704//organic substance metabolic process;GO:0043170//macromolecule metabolic process;GO:0044267//cellular protein metabolic process;GO:0044260//cellular macromolecule metabolic process;GO:0043412//macromolecule modification;GO:0044237//cellular …
ENSDARG00000001888	186	165.5	8.52	7.545	-0.17533253	0.40189929	0.648402419	no	ppm1ba	protein phosphatase, Mg2+/Mn2+ dependent, 1Ba [Source:ZFIN;Acc:ZDB-GENE-991102-16]	Environmental Information Processing	Signal transduction	ko04010//MAPK signaling pathway	K04461	-	GO:0016788//hydrolase activity, acting on ester bonds;GO:0042578//phosphoric ester hydrolase activity;GO:0016791//phosphatase activity;GO:0005488//binding;GO:0043167//ion binding;GO:0003674//molecular_function;GO:0016787//hydrolase activity;GO:0003824//catalytic activity	GO:0044238//primary metabolic process;GO:0008150//biological_process;GO:0006464//cellular protein modification process;GO:0009987//cellular process;GO:0071704//organic substance metabolic process;GO:0008152//metabolic process;GO:0044267//cellular protein metabolic process;GO:0044237//cellular metabolic process;GO:0043412//macromolecule modification;GO:0043170//macromolecule metabolic process;GO:0…
ENSDARG00000001889	8574.02	4337.32	644.6	322.82	-0.997674226	2.08E-08	5.03E-07	no	tuba1a	tubulin, alpha 1a [Source:ZFIN;Acc:ZDB-GENE-090507-4]	Cellular Processes	Transport and catabolism;Cellular commiunity	ko04145//Phagosome;ko04540//Gap junction	K07374	GO:0043228//non-membrane-bounded organelle;GO:0005856//cytoskeleton;GO:0044424//intracellular part;GO:0043226//organelle;GO:0043229//intracellular organelle;GO:0043232//intracellular non-membrane-bounded organelle;GO:0005623//cell;GO:0005622//intracellular;GO:0005737//cytoplasm;GO:0005575//cellular_component;GO:0044464//cell part	GO:0017111//nucleoside-triphosphatase activity;GO:0016787//hydrolase activity;GO:0003824//catalytic activity;GO:0003924//GTPase activity;GO:0043167//ion binding;GO:0016818//hydrolase activity, acting on acid anhydrides, in phosphorus-containing anhydrides;GO:0005488//binding;GO:0005198//structural molecule activity;GO:0016817//hydrolase activity, acting on acid anhydrides;GO:0003674//molecular_fu…	GO:0071840//cellular component organization or biogenesis;GO:0016265//death;GO:0044763//single-organism cellular process;GO:0032502//developmental process;GO:0009987//cellular process;GO:0006996//organelle organization;GO:0048646//anatomical structure formation involved in morphogenesis;GO:0044699//single-organism process;GO:0016043//cellular component organization;GO:0008219//cell death;GO:00488…
ENSDARG00000001890	1149.815	1650.675	31.43	44.79	0.511034394	0.003979455	0.021702328	no	stt3b	STT3B, subunit of the oligosaccharyltransferase complex (catalytic) [Source:ZFIN;Acc:ZDB-GENE-030131-2638]	-	-	-	-	GO:0005575//cellular_component;GO:0043229//intracellular organelle;GO:0005623//cell;GO:0043226//organelle;GO:0005783//endoplasmic reticulum;GO:0044464//cell part;GO:0012505//endomembrane system;GO:0044424//intracellular part;GO:0044444//cytoplasmic part;GO:0005737//cytoplasm;GO:0005622//intracellular;GO:0043231//intracellular membrane-bounded organelle;GO:0043227//membrane-bounded organelle	GO:0003674//molecular_function;GO:0016757//transferase activity, transferring glycosyl groups;GO:0016740//transferase activity;GO:0003824//catalytic activity	GO:0005975//carbohydrate metabolic process;GO:0044238//primary metabolic process;GO:0044237//cellular metabolic process;GO:0043412//macromolecule modification;GO:0009987//cellular process;GO:0044260//cellular macromolecule metabolic process;GO:0009058//biosynthetic process;GO:0043170//macromolecule metabolic process;GO:0008152//metabolic process;GO:0019538//protein metabolic process;GO:0036211//p…
ENSDARG00000001891	5	5.02	0.265	0.25	-0.084064265	1	1	no	syt14b	synaptotagmin XIVb [Source:ZFIN;Acc:ZDB-GENE-041014-36]	-	-	-	-	GO:0005575//cellular_component	-	-
ENSDARG00000001897	480.5	704	20.19	32.315	0.678563081	0.004363058	0.023292314	no	man2b1	mannosidase, alpha, class 2B, member 1 [Source:ZFIN;Acc:ZDB-GENE-050327-52]	Metabolism;Cellular Processes	Glycan biosynthesis and metabolism;Transport and catabolism	ko04142//Lysosome;ko00511//Other glycan degradation	K12311	-	GO:0016798//hydrolase activity, acting on glycosyl bonds;GO:0003824//catalytic activity;GO:0043167//ion binding;GO:0005488//binding;GO:0003674//molecular_function;GO:0016787//hydrolase activity	GO:0019538//protein metabolic process;GO:0008152//metabolic process;GO:0009987//cellular process;GO:0044237//cellular metabolic process;GO:0044710//single-organism metabolic process;GO:0006464//cellular protein modification process;GO:0008150//biological_process;GO:0044238//primary metabolic process;GO:0036211//protein modification process;GO:0043170//macromolecule metabolic process;GO:0005975//c…
ENSDARG00000001898	74.5	89.5	5.56	6.51	0.22757266	0.336870132	0.581076919	no	manea	mannosidase, endo-alpha [Source:ZFIN;Acc:ZDB-GENE-040912-87]	-	-	-	-	GO:0005575//cellular_component	GO:0016787//hydrolase activity;GO:0003674//molecular_function;GO:0003824//catalytic activity;GO:0016798//hydrolase activity, acting on glycosyl bonds	GO:0008150//biological_process
ENSDARG00000001906	0.5	2	0.06	0.185	1.624490865	0.412055758	0.6559522	no	si:dkey-247m21.3	si:dkey-247m21.3 [Source:ZFIN;Acc:ZDB-GENE-091204-249]	-	-	-	-	GO:0005575//cellular_component;GO:0005623//cell;GO:0071944//cell periphery;GO:0044464//cell part;GO:0005886//plasma membrane;GO:0016020//membrane	GO:0004871//signal transducer activity;GO:0003674//molecular_function	GO:0065007//biological regulation;GO:0009987//cellular process;GO:0044699//single-organism process;GO:0050896//response to stimulus;GO:0044700//single organism signaling;GO:0050794//regulation of cellular process;GO:0007154//cell communication;GO:0008150//biological_process;GO:0044763//single-organism cellular process;GO:0050789//regulation of biological process;GO:0007165//signal transduction;GO…
ENSDARG00000001909	38.5	60.5	1.645	2.575	0.646484848	0.027991779	0.100449074	no	vill	villin-like [Source:ZFIN;Acc:ZDB-GENE-081222-1]	-	-	-	-	-	GO:0005488//binding;GO:0003674//molecular_function;GO:0008092//cytoskeletal protein binding;GO:0005515//protein binding	GO:0009987//cellular process;GO:0007010//cytoskeleton organization;GO:0006996//organelle organization;GO:0008150//biological_process;GO:0071840//cellular component organization or biogenesis;GO:0016043//cellular component organization
ENSDARG00000001910	147.5	105.5	4.01	2.81	-0.513032106	0.036167316	0.121490548	no	rorab	RAR-related orphan receptor A, paralog b [Source:ZFIN;Acc:ZDB-GENE-040426-855]	-	-	-	-	GO:0044424//intracellular part;GO:0044464//cell part;GO:0043229//intracellular organelle;GO:0043231//intracellular membrane-bounded organelle;GO:0043226//organelle;GO:0005622//intracellular;GO:0043227//membrane-bounded organelle;GO:0005623//cell;GO:0005634//nucleus;GO:0005575//cellular_component	GO:0003677//DNA binding;GO:0001071//nucleic acid binding transcription factor activity;GO:1901363//heterocyclic compound binding;GO:0003674//molecular_function;GO:0003676//nucleic acid binding;GO:0005488//binding;GO:0043167//ion binding;GO:0097159//organic cyclic compound binding;GO:0003700//transcription factor activity, sequence-specific DNA binding;GO:0004871//signal transducer activity	GO:0050896//response to stimulus;GO:0007154//cell communication;GO:0044763//single-organism cellular process;GO:0050789//regulation of biological process;GO:0023052//signaling;GO:0051716//cellular response to stimulus;GO:0008152//metabolic process;GO:0008150//biological_process;GO:0044237//cellular metabolic process;GO:0050794//regulation of cellular process;GO:0009058//biosynthetic process;GO:00…
ENSDARG00000001912	27	38	0.84	1.18	0.490325627	0.16264886	0.358982116	no	drd4-rs	dopamine receptor D4 related sequence [Source:ZFIN;Acc:ZDB-GENE-051113-172]	Environmental Information Processing	Signaling molecules and interaction	ko04080//Neuroactive ligand-receptor interaction	K04147	GO:0005886//plasma membrane;GO:0016020//membrane;GO:0005575//cellular_component;GO:0005623//cell;GO:0044464//cell part;GO:0071944//cell periphery	GO:0003674//molecular_function;GO:0004871//signal transducer activity	GO:0007165//signal transduction;GO:0009987//cellular process;GO:0065007//biological regulation;GO:0044763//single-organism cellular process;GO:0007154//cell communication;GO:0050789//regulation of biological process;GO:0023052//signaling;GO:0051716//cellular response to stimulus;GO:0050896//response to stimulus;GO:0050794//regulation of cellular process;GO:0044699//single-organism process;GO:0008…
ENSDARG00000001913	130	305	3.265	7.635	1.225545165	2.03E-08	4.91E-07	yes	palmda	palmdelphin a [Source:ZFIN;Acc:ZDB-GENE-070705-48]	-	-	-	-	GO:0005575//cellular_component	-	GO:0009987//cellular process;GO:0032502//developmental process;GO:0071840//cellular component organization or biogenesis;GO:0044699//single-organism process;GO:0044763//single-organism cellular process;GO:0008150//biological_process;GO:0048869//cellular developmental process;GO:0044767//single-organism developmental process;GO:0016043//cellular component organization;GO:0009653//anatomical struct…
ENSDARG00000001929	62	67	1.785	1.915	0.101420318	0.746961293	0.922519517	no	pink1	PTEN induced putative kinase 1 [Source:ZFIN;Acc:ZDB-GENE-041212-53]	-	-	-	-	GO:0043231//intracellular membrane-bounded organelle;GO:0005829//cytosol;GO:0044424//intracellular part;GO:0043226//organelle;GO:0005737//cytoplasm;GO:0005623//cell;GO:0044464//cell part;GO:0043229//intracellular organelle;GO:0005622//intracellular;GO:0005575//cellular_component;GO:0043227//membrane-bounded organelle;GO:0005739//mitochondrion;GO:0044444//cytoplasmic part	GO:0005488//binding;GO:0016301//kinase activity;GO:0016740//transferase activity;GO:0003824//catalytic activity;GO:0016772//transferase activity, transferring phosphorus-containing groups;GO:0043167//ion binding;GO:0003674//molecular_function	GO:0044700//single organism signaling;GO:0051716//cellular response to stimulus;GO:0007154//cell communication;GO:0008219//cell death;GO:0048869//cellular developmental process;GO:0044767//single-organism developmental process;GO:0006996//organelle organization;GO:0016043//cellular component organization;GO:0050789//regulation of biological process;GO:0030154//cell differentiation;GO:0044238//pri…
ENSDARG00000001930	140	136.5	4.93	4.705	-0.067392924	0.872100004	1	no	klhl15	kelch-like family member 15 [Source:ZFIN;Acc:ZDB-GENE-040801-99]	-	-	-	-	GO:0005623//cell;GO:0044464//cell part;GO:0005575//cellular_component;GO:0005622//intracellular	-	GO:0044260//cellular macromolecule metabolic process;GO:0044238//primary metabolic process;GO:0044237//cellular metabolic process;GO:0008150//biological_process;GO:0043412//macromolecule modification;GO:0043170//macromolecule metabolic process;GO:0009987//cellular process;GO:0044267//cellular protein metabolic process;GO:0036211//protein modification process;GO:0071704//organic substance metaboli…
ENSDARG00000001933	29	44	1.57	2.39	0.606246059	0.104818095	0.265077833	no	prkag2b	PREDICTED: 5'-AMP-activated protein kinase subunit gamma-1 isoform X1 [Danio rerio]	Organismal Systems;Environmental Information Processing	Endocrine system;Signal transduction	ko04068//FoxO signaling pathway;ko04910//Insulin signaling pathway;ko04920//Adipocytokine signaling pathway	K07200	-	-	-
ENSDARG00000001937	66	90	1.36	1.845	0.440014165	0.222953445	0.44658811	no	LO018422.1	-	Organismal Systems	Endocrine system	ko04920//Adipocytokine signaling pathway	K07299	GO:0005575//cellular_component	GO:0003674//molecular_function;GO:0005215//transporter activity;GO:0022857//transmembrane transporter activity	GO:0044699//single-organism process;GO:0044765//single-organism transport;GO:0006810//transport;GO:0009987//cellular process;GO:0044763//single-organism cellular process;GO:0008150//biological_process;GO:1902578//single-organism localization;GO:0051234//establishment of localization;GO:0051179//localization;GO:0055085//transmembrane transport
ENSDARG00000001939	228	228	8.645	9.21	0.091335192	0.98673646	1	no	b3gat3	beta-1,3-glucuronyltransferase 3 (glucuronosyltransferase I) [Source:ZFIN;Acc:ZDB-GENE-020419-3]	Metabolism	Glycan biosynthesis and metabolism	ko00534//Glycosaminoglycan biosynthesis - heparan sulfate / heparin;ko00532//Glycosaminoglycan biosynthesis - chondroitin sulfate / dermatan sulfate	K10158	GO:0005623//cell;GO:0044444//cytoplasmic part;GO:0044424//intracellular part;GO:0044464//cell part;GO:0005737//cytoplasm;GO:0005622//intracellular;GO:0005575//cellular_component;GO:0005794//Golgi apparatus;GO:0012505//endomembrane system;GO:0043229//intracellular organelle;GO:0043227//membrane-bounded organelle;GO:0043226//organelle;GO:0043231//intracellular membrane-bounded organelle	GO:0043167//ion binding;GO:0016740//transferase activity;GO:0005488//binding;GO:0016757//transferase activity, transferring glycosyl groups;GO:0003824//catalytic activity;GO:0003674//molecular_function	GO:0016043//cellular component organization;GO:0009058//biosynthetic process;GO:0006790//sulfur compound metabolic process;GO:0044699//single-organism process;GO:0071704//organic substance metabolic process;GO:0044281//small molecule metabolic process;GO:0043412//macromolecule modification;GO:0043170//macromolecule metabolic process;GO:0009987//cellular process;GO:0044238//primary metabolic proce…
ENSDARG00000001940	410	449.5	22.42	24.355	0.119431705	0.506563028	0.746505375	no	dnajc1	DnaJ (Hsp40) homolog, subfamily C, member 1 [Source:ZFIN;Acc:ZDB-GENE-061103-529]	Genetic Information Processing	Folding, sorting and degradation	ko04141//Protein processing in endoplasmic reticulum	K09521	GO:0005623//cell;GO:0005622//intracellular;GO:0005575//cellular_component;GO:0043227//membrane-bounded organelle;GO:0005634//nucleus;GO:0044464//cell part;GO:0043229//intracellular organelle;GO:0044424//intracellular part;GO:0043231//intracellular membrane-bounded organelle;GO:0043226//organelle	GO:0005488//binding;GO:0003676//nucleic acid binding;GO:0003674//molecular_function;GO:0097159//organic cyclic compound binding;GO:0003677//DNA binding;GO:1901363//heterocyclic compound binding	-
ENSDARG00000001950	3976.5	5199	512.05	665.275	0.377666129	0.02756559	0.099230069	no	ak1	adenylate kinase 1 [Source:ZFIN;Acc:ZDB-GENE-040822-37]	Metabolism	Nucleotide metabolism	ko00230//Purine metabolism	K00939	GO:0044424//intracellular part;GO:0005575//cellular_component;GO:0005623//cell;GO:0005737//cytoplasm;GO:0044464//cell part;GO:0005622//intracellular	GO:0043167//ion binding;GO:0016740//transferase activity;GO:0003824//catalytic activity;GO:0003674//molecular_function;GO:0016301//kinase activity;GO:0005488//binding;GO:0016772//transferase activity, transferring phosphorus-containing groups	GO:0034641//cellular nitrogen compound metabolic process;GO:0009058//biosynthetic process;GO:0044281//small molecule metabolic process;GO:0008150//biological_process;GO:0044237//cellular metabolic process;GO:0009987//cellular process;GO:0008152//metabolic process;GO:0006807//nitrogen compound metabolic process;GO:0044699//single-organism process;GO:0044710//single-organism metabolic process
ENSDARG00000001953	56	65.5	1.865	2.215	0.248131068	0.437002999	0.681266611	no	pfkfb3	6-phosphofructo-2-kinase/fructose-2,6-biphosphatase 3 [Source:ZFIN;Acc:ZDB-GENE-040426-2724]	Metabolism	Carbohydrate metabolism	ko00051//Fructose and mannose metabolism	K01103	GO:0005575//cellular_component	GO:0003824//catalytic activity;GO:0043167//ion binding;GO:0016772//transferase activity, transferring phosphorus-containing groups;GO:0016740//transferase activity;GO:0016301//kinase activity;GO:0005488//binding;GO:0003674//molecular_function	GO:0044699//single-organism process;GO:0044281//small molecule metabolic process;GO:0005975//carbohydrate metabolic process;GO:0044238//primary metabolic process;GO:0008152//metabolic process;GO:0044710//single-organism metabolic process;GO:0071704//organic substance metabolic process;GO:0008150//biological_process
ENSDARG00000001968	116.5	185.5	2.365	3.77	0.67272434	0.006109097	0.030659061	no	dock5	dedicator of cytokinesis 5 [Source:ZFIN;Acc:ZDB-GENE-080108-4]	-	-	-	-	GO:0005575//cellular_component;GO:0005623//cell;GO:0005622//intracellular;GO:0044464//cell part	GO:0005488//binding;GO:0003674//molecular_function;GO:0019899//enzyme binding;GO:0005515//protein binding	GO:0048646//anatomical structure formation involved in morphogenesis;GO:0048869//cellular developmental process;GO:0044699//single-organism process;GO:0009987//cellular process;GO:0044700//single organism signaling;GO:0007154//cell communication;GO:0050789//regulation of biological process;GO:0007165//signal transduction;GO:0065007//biological regulation;GO:0044763//single-organism cellular proce…
ENSDARG00000001969	251	402	10.875	17.875	0.716927841	0.000200596	0.001810653	no	txlng	taxilin gamma [Source:ZFIN;Acc:ZDB-GENE-060616-122]	-	-	-	-	GO:0005575//cellular_component	GO:0003674//molecular_function	GO:0008150//biological_process
ENSDARG00000001971	2	0.5	0.26	0.065	-2	0.405600617	0.651877308	no	cthrc1b	PREDICTED: collagen triple helix repeat-containing protein 1 [Danio rerio]	-	-	-	-	-	-	-
ENSDARG00000001975	136.5	78.5	6.075	3.46	-0.812112371	0.00154669	0.010062039	no	hsd11b2	hydroxysteroid (11-beta) dehydrogenase 2 [Source:ZFIN;Acc:ZDB-GENE-030131-6030]	Metabolism	Lipid metabolism	ko00140//Steroid hormone biosynthesis	K00071	GO:0005575//cellular_component	GO:0016491//oxidoreductase activity;GO:0003674//molecular_function;GO:0003824//catalytic activity	GO:0044281//small molecule metabolic process;GO:0044699//single-organism process;GO:0006950//response to stress;GO:0008152//metabolic process;GO:0044238//primary metabolic process;GO:0071704//organic substance metabolic process;GO:0006629//lipid metabolic process;GO:0044710//single-organism metabolic process;GO:0050896//response to stimulus;GO:0008150//biological_process
ENSDARG00000001976	22	41	1.675	3.13	0.902001562	0.039004237	0.128550558	no	fkbp16	FK506 binding protein 16 [Source:ZFIN;Acc:ZDB-GENE-050208-116]	-	-	-	-	GO:0005737//cytoplasm;GO:0005623//cell;GO:0005622//intracellular;GO:0044424//intracellular part;GO:0044464//cell part;GO:0005575//cellular_component	GO:0003824//catalytic activity;GO:0003674//molecular_function;GO:0016853//isomerase activity	GO:0044260//cellular macromolecule metabolic process;GO:0044238//primary metabolic process;GO:0006464//cellular protein modification process;GO:0044237//cellular metabolic process;GO:0008152//metabolic process;GO:0043170//macromolecule metabolic process;GO:0043412//macromolecule modification;GO:0071704//organic substance metabolic process;GO:0019538//protein metabolic process;GO:0006457//protein …
ENSDARG00000001993	8	14	0.155	0.275	0.827163403	0.204485535	0.420800054	no	myhb	myosin, heavy chain b [Source:ZFIN;Acc:ZDB-GENE-081124-1]	Cellular Processes	Cellular commiunity	ko04530//Tight junction	K10352	GO:0032991//macromolecular complex;GO:0043234//protein complex;GO:0043228//non-membrane-bounded organelle;GO:0043229//intracellular organelle;GO:0043232//intracellular non-membrane-bounded organelle;GO:0044464//cell part;GO:0005856//cytoskeleton;GO:0043226//organelle;GO:0005575//cellular_component;GO:0005622//intracellular;GO:0044424//intracellular part;GO:0005623//cell	GO:0005515//protein binding;GO:0008092//cytoskeletal protein binding;GO:0003674//molecular_function;GO:0005488//binding;GO:0043167//ion binding	GO:0008150//biological_process
ENSDARG00000001994	1118	785	50.355	35.46	-0.505942502	0.002749899	0.016091926	no	stxbp1a	syntaxin binding protein 1a [Source:ZFIN;Acc:ZDB-GENE-050626-106]	-	-	-	-	GO:0005575//cellular_component	GO:0003674//molecular_function	GO:0051234//establishment of localization;GO:0016192//vesicle-mediated transport;GO:0006810//transport;GO:0008150//biological_process;GO:0051179//localization
ENSDARG00000001999	206	229	4.385	5.245	0.25836593	0.504178334	0.744329679	no	adamts18	ADAM metallopeptidase with thrombospondin type 1 motif, 18 [Source:ZFIN;Acc:ZDB-GENE-070815-1]	-	-	-	-	-	GO:0008233//peptidase activity;GO:0003824//catalytic activity;GO:0043167//ion binding;GO:0016787//hydrolase activity;GO:0005488//binding;GO:0003674//molecular_function	GO:0008150//biological_process
ENSDARG00000002002	29.48	29	2.35	2.535	0.10932499	1	1	no	lmcd1	LIM and cysteine-rich domains 1 [Source:ZFIN;Acc:ZDB-GENE-040426-1067]	-	-	-	-	GO:0044424//intracellular part;GO:0044464//cell part;GO:0043226//organelle;GO:0043227//membrane-bounded organelle;GO:0043231//intracellular membrane-bounded organelle;GO:0005634//nucleus;GO:0005575//cellular_component;GO:0005623//cell;GO:0005622//intracellular;GO:0043229//intracellular organelle	GO:0003674//molecular_function;GO:0005488//binding;GO:0043167//ion binding;GO:0000988//transcription factor activity, protein binding	GO:0034641//cellular nitrogen compound metabolic process;GO:0009058//biosynthetic process;GO:0044237//cellular metabolic process;GO:0009987//cellular process;GO:0008150//biological_process;GO:0006807//nitrogen compound metabolic process;GO:0008152//metabolic process
ENSDARG00000002006	126	94	7.09	5.465	-0.375564132	0.080729205	0.21987542	no	rxrbb	retinoid x receptor, beta b [Source:ZFIN;Acc:ZDB-GENE-990415-242]	-	-	-	-	GO:0005623//cell;GO:0044424//intracellular part;GO:0044464//cell part;GO:0043226//organelle;GO:0043229//intracellular organelle;GO:0043231//intracellular membrane-bounded organelle;GO:0005634//nucleus;GO:0043227//membrane-bounded organelle;GO:0005622//intracellular;GO:0005575//cellular_component	GO:0043167//ion binding;GO:0003676//nucleic acid binding;GO:0005488//binding;GO:0003674//molecular_function;GO:0004871//signal transducer activity;GO:0003700//transcription factor activity, sequence-specific DNA binding;GO:1901363//heterocyclic compound binding;GO:0001071//nucleic acid binding transcription factor activity;GO:0097159//organic cyclic compound binding;GO:0003677//DNA binding	GO:0009058//biosynthetic process;GO:0050794//regulation of cellular process;GO:0044237//cellular metabolic process;GO:0034641//cellular nitrogen compound metabolic process;GO:0008152//metabolic process;GO:0065007//biological regulation;GO:0050896//response to stimulus;GO:0051716//cellular response to stimulus;GO:0007165//signal transduction;GO:0044763//single-organism cellular process;GO:0009987/…
ENSDARG00000002013	89.5	136	3.84	5.715	0.573647187	0.016275374	0.066400863	no	grb10a	growth factor receptor-bound protein 10a [Source:ZFIN;Acc:ZDB-GENE-040822-32]	-	-	-	-	GO:0005575//cellular_component	-	GO:0008150//biological_process;GO:0050896//response to stimulus;GO:0050789//regulation of biological process;GO:0007154//cell communication;GO:0044763//single-organism cellular process;GO:0009987//cellular process;GO:0051716//cellular response to stimulus;GO:0044700//single organism signaling;GO:0044699//single-organism process;GO:0007165//signal transduction;GO:0050794//regulation of cellular pr…
ENSDARG00000002016	339	333	20.375	19.88	-0.035482302	0.847184782	0.990355014	no	ppil2	peptidylprolyl isomerase (cyclophilin)-like 2 [Source:ZFIN;Acc:ZDB-GENE-040426-1096]	Genetic Information Processing	Folding, sorting and degradation	ko04120//Ubiquitin mediated proteolysis	K10598	GO:0005623//cell;GO:0043229//intracellular organelle;GO:0043227//membrane-bounded organelle;GO:0005622//intracellular;GO:0043226//organelle;GO:0044424//intracellular part;GO:0005575//cellular_component;GO:0043231//intracellular membrane-bounded organelle;GO:0044464//cell part;GO:0005634//nucleus	GO:0003824//catalytic activity;GO:0016853//isomerase activity;GO:0003674//molecular_function	GO:0036211//protein modification process;GO:0019538//protein metabolic process;GO:0043412//macromolecule modification;GO:0006457//protein folding;GO:0044237//cellular metabolic process;GO:0009987//cellular process;GO:0043170//macromolecule metabolic process;GO:0044260//cellular macromolecule metabolic process;GO:0044267//cellular protein metabolic process;GO:0008150//biological_process;GO:0071704…
ENSDARG00000002020	190	137	4.99	2.92	-0.773071446	0.02588535	0.094757396	no	rictorb	RPTOR independent companion of MTOR, complex 2b [Source:ZFIN;Acc:ZDB-GENE-070810-5]	-	-	-	-	GO:0005622//intracellular;GO:0005575//cellular_component;GO:0043234//protein complex;GO:0044464//cell part;GO:0032991//macromolecular complex;GO:0005623//cell	GO:0030234//enzyme regulator activity;GO:0098772//molecular function regulator;GO:0003674//molecular_function	GO:0071840//cellular component organization or biogenesis;GO:0023052//signaling;GO:0050789//regulation of biological process;GO:0044763//single-organism cellular process;GO:0044700//single organism signaling;GO:0044699//single-organism process;GO:0007010//cytoskeleton organization;GO:0016043//cellular component organization;GO:0007154//cell communication;GO:0065007//biological regulation;GO:00069…
ENSDARG00000002021	177	230.5	7.16	9.245	0.368713732	0.068495549	0.194781924	no	pygb	phosphorylase, glycogen; brain [Source:ZFIN;Acc:ZDB-GENE-040928-2]	-	-	-	-	GO:0005575//cellular_component;GO:0005623//cell;GO:0005622//intracellular;GO:0044424//intracellular part;GO:0005737//cytoplasm;GO:0044464//cell part	GO:0043167//ion binding;GO:0005488//binding;GO:0003824//catalytic activity;GO:0016740//transferase activity;GO:0016757//transferase activity, transferring glycosyl groups;GO:0003674//molecular_function	GO:0008152//metabolic process;GO:0044238//primary metabolic process;GO:0044237//cellular metabolic process;GO:0006091//generation of precursor metabolites and energy;GO:0005975//carbohydrate metabolic process;GO:0008150//biological_process;GO:0071704//organic substance metabolic process;GO:0009056//catabolic process;GO:0009987//cellular process
ENSDARG00000002026	40.5	24	7.515	5.585	-0.428215823	0.040262112	0.131747597	no	qkib	QKI, KH domain containing, RNA binding b [Source:ZFIN;Acc:ZDB-GENE-081028-54]	-	-	-	-	-	GO:0003723//RNA binding;GO:0097159//organic cyclic compound binding;GO:0005488//binding;GO:0003676//nucleic acid binding;GO:0003674//molecular_function;GO:1901363//heterocyclic compound binding	-
ENSDARG00000002031	412.5	346.5	21.71	18.08	-0.263965048	0.150047883	0.340552199	no	tox4a	TOX high mobility group box family member 4 a [Source:ZFIN;Acc:ZDB-GENE-070912-576]	-	-	-	-	GO:0044464//cell part;GO:0043227//membrane-bounded organelle;GO:0044424//intracellular part;GO:0005622//intracellular;GO:0005623//cell;GO:0043231//intracellular membrane-bounded organelle;GO:0043229//intracellular organelle;GO:0043226//organelle;GO:0005634//nucleus;GO:0005575//cellular_component	GO:0003676//nucleic acid binding;GO:0003674//molecular_function;GO:1901363//heterocyclic compound binding;GO:0097159//organic cyclic compound binding;GO:0005488//binding;GO:0003677//DNA binding	-
ENSDARG00000002037	20.5	40	0.83	1.59	0.937843524	0.015659612	0.064573753	no	pfkfb2b	6-phosphofructo-2-kinase/fructose-2,6-biphosphatase 2b [Source:ZFIN;Acc:ZDB-GENE-120222-1]	Metabolism	Carbohydrate metabolism	ko00051//Fructose and mannose metabolism	K19029	-	GO:0043167//ion binding;GO:0016772//transferase activity, transferring phosphorus-containing groups;GO:0003824//catalytic activity;GO:0003674//molecular_function;GO:0016740//transferase activity;GO:0016301//kinase activity;GO:0005488//binding	GO:0044699//single-organism process;GO:0005975//carbohydrate metabolic process;GO:0044710//single-organism metabolic process;GO:0008150//biological_process;GO:0044238//primary metabolic process;GO:0044281//small molecule metabolic process;GO:0071704//organic substance metabolic process;GO:0008152//metabolic process
ENSDARG00000002060	58.5	40.5	3.465	2.295	-0.594361199	0.079298634	0.216788653	no	brf2	BRF2, RNA polymerase III transcription initiation factor [Source:ZFIN;Acc:ZDB-GENE-040801-43]	-	-	-	-	-	GO:0003674//molecular_function;GO:0005488//binding;GO:0043167//ion binding	GO:0009058//biosynthetic process;GO:0071840//cellular component organization or biogenesis;GO:0065003//macromolecular complex assembly;GO:0016043//cellular component organization;GO:0008150//biological_process;GO:0009987//cellular process;GO:0034641//cellular nitrogen compound metabolic process;GO:0006807//nitrogen compound metabolic process;GO:0043933//macromolecular complex subunit organization…
ENSDARG00000002071	181	121.5	9.61	6.49	-0.566317953	0.257235561	0.492863529	no	adss	adenylosuccinate synthase [Source:ZFIN;Acc:ZDB-GENE-050417-337]	Metabolism	Amino acid metabolism;Nucleotide metabolism	ko00230//Purine metabolism;ko00250//Alanine, aspartate and glutamate metabolism	K01939	GO:0005623//cell;GO:0005575//cellular_component;GO:0005737//cytoplasm;GO:0005622//intracellular;GO:0044464//cell part;GO:0044424//intracellular part	GO:0003674//molecular_function;GO:0016874//ligase activity;GO:0003824//catalytic activity;GO:0043167//ion binding;GO:0005488//binding	GO:0008150//biological_process;GO:0008152//metabolic process;GO:0044237//cellular metabolic process;GO:0044699//single-organism process;GO:0044281//small molecule metabolic process;GO:0009058//biosynthetic process;GO:0034641//cellular nitrogen compound metabolic process;GO:0006807//nitrogen compound metabolic process;GO:0009987//cellular process;GO:0044710//single-organism metabolic process
ENSDARG00000002077	82	93.5	7.62	8.565	0.168662249	0.552376051	0.776185837	no	mnat1	MNAT CDK-activating kinase assembly factor 1 [Source:ZFIN;Acc:ZDB-GENE-041010-203]	Genetic Information Processing	Transcription;Replication and repair	ko03022//Basal transcription factors;ko03420//Nucleotide excision repair	K10842	GO:0005623//cell;GO:0043234//protein complex;GO:0005654//nucleoplasm;GO:0044428//nuclear part;GO:0005634//nucleus;GO:0043226//organelle;GO:0043229//intracellular organelle;GO:0031974//membrane-enclosed lumen;GO:0005575//cellular_component;GO:0043231//intracellular membrane-bounded organelle;GO:0005622//intracellular;GO:0044464//cell part;GO:0043227//membrane-bounded organelle;GO:0031981//nuclear …	GO:0098772//molecular function regulator;GO:0003674//molecular_function;GO:0030234//enzyme regulator activity	GO:0006464//cellular protein modification process;GO:0044260//cellular macromolecule metabolic process;GO:0009058//biosynthetic process;GO:0008150//biological_process;GO:0006139//nucleobase-containing compound metabolic process;GO:0044763//single-organism cellular process;GO:0009987//cellular process;GO:0006950//response to stress;GO:0090304//nucleic acid metabolic process;GO:0006259//DNA metabol…
ENSDARG00000002082	2032	2815	178.86	249.27	0.478878482	0.007568515	0.036330455	no	csnk2a1	casein kinase 2, alpha 1 polypeptide [Source:ZFIN;Acc:ZDB-GENE-990415-27]	Cellular Processes;Genetic Information Processing;Environmental Information Processing	Cellular commiunity;Translation;Signal transduction	ko04530//Tight junction;ko04310//Wnt signaling pathway;ko04520//Adherens junction;ko03008//Ribosome biogenesis in eukaryotes	K03097	-	GO:0016740//transferase activity;GO:0016301//kinase activity;GO:0003674//molecular_function;GO:0043167//ion binding;GO:0016772//transferase activity, transferring phosphorus-containing groups;GO:0005488//binding;GO:0003824//catalytic activity	GO:0044237//cellular metabolic process;GO:0008152//metabolic process;GO:0043412//macromolecule modification;GO:0044238//primary metabolic process;GO:0044267//cellular protein metabolic process;GO:0006464//cellular protein modification process;GO:0008150//biological_process;GO:0044260//cellular macromolecule metabolic process;GO:0036211//protein modification process;GO:0019538//protein metabolic p…
ENSDARG00000002084	759	1264	16.095	26.74	0.732386889	0.00285928	0.016609158	no	lamb2	laminin, beta 2 (laminin S) [Source:ZFIN;Acc:ZDB-GENE-081030-4]	Cellular Processes;Environmental Information Processing	Signaling molecules and interaction;Cellular commiunity	ko04510//Focal adhesion;ko04512//ECM-receptor interaction	K06243	-	-	GO:0043062//extracellular structure organization;GO:0009790//embryo development;GO:0009987//cellular process;GO:0007275//multicellular organism development;GO:0032501//multicellular organismal process;GO:0044699//single-organism process;GO:0044707//single-multicellular organism process;GO:0044767//single-organism developmental process;GO:0032502//developmental process;GO:0044763//single-organism …
ENSDARG00000002097	0	0	0.001	0.001	0	1	1	notest	si:dkeyp-52c3.7	si:dkeyp-52c3.7 [Source:ZFIN;Acc:ZDB-GENE-110411-213]	-	-	-	-	-	GO:0005488//binding;GO:0043167//ion binding;GO:0003674//molecular_function	-
ENSDARG00000002127	767	495.5	24.185	15.495	-0.642309783	0.000259641	0.002259183	no	stam	signal transducing adaptor molecule (SH3 domain and ITAM motif) 1 [Source:ZFIN;Acc:ZDB-GENE-031118-123]	Environmental Information Processing;Cellular Processes	Signal transduction;Transport and catabolism	ko04144//Endocytosis;ko04630//Jak-STAT signaling pathway	K04705	GO:0005575//cellular_component;GO:0005622//intracellular;GO:0044464//cell part;GO:0005623//cell	-	GO:0051179//localization;GO:0006810//transport;GO:0008150//biological_process;GO:0051234//establishment of localization
ENSDARG00000002128	198	224.5	11.5	12.9	0.165737204	0.425470253	0.669262874	no	cwf19l1	CWF19-like 1, cell cycle control [Source:ZFIN;Acc:ZDB-GENE-031204-5]	-	-	-	-	GO:0005575//cellular_component	-	-
ENSDARG00000002131	962	552	62.13	35.85	-0.793316935	1.68E-05	0.000209856	no	celf2	cugbp, Elav-like family member 2 [Source:ZFIN;Acc:ZDB-GENE-030826-35]	-	-	-	-	GO:0043229//intracellular organelle;GO:0043226//organelle;GO:0043231//intracellular membrane-bounded organelle;GO:0005575//cellular_component;GO:0005634//nucleus;GO:0005623//cell;GO:0044464//cell part;GO:0044424//intracellular part;GO:0005622//intracellular;GO:0005737//cytoplasm;GO:0043227//membrane-bounded organelle	GO:0003674//molecular_function;GO:0097159//organic cyclic compound binding;GO:0003723//RNA binding;GO:0003676//nucleic acid binding;GO:1901363//heterocyclic compound binding;GO:0005488//binding	GO:0046483//heterocycle metabolic process;GO:0006139//nucleobase-containing compound metabolic process;GO:0044260//cellular macromolecule metabolic process;GO:0090304//nucleic acid metabolic process;GO:1901360//organic cyclic compound metabolic process;GO:0071704//organic substance metabolic process;GO:0009987//cellular process;GO:0010467//gene expression;GO:0006397//mRNA processing;GO:0006396//R…
ENSDARG00000002165	4	8.5	0.405	0.855	1.078002512	0.168106908	0.367331404	no	psme1	proteasome activator subunit 1 [Source:ZFIN;Acc:ZDB-GENE-991110-17]	Genetic Information Processing	Folding, sorting and degradation	ko03050//Proteasome	K06696	GO:0032991//macromolecular complex;GO:0005575//cellular_component;GO:0044464//cell part;GO:0005737//cytoplasm;GO:0044424//intracellular part;GO:0005623//cell;GO:0043234//protein complex;GO:0005622//intracellular	GO:0030234//enzyme regulator activity;GO:0003674//molecular_function;GO:0098772//molecular function regulator	GO:0044763//single-organism cellular process;GO:0009056//catabolic process;GO:0008152//metabolic process;GO:0000278//mitotic cell cycle;GO:0008150//biological_process;GO:0044699//single-organism process;GO:0007049//cell cycle;GO:0009987//cellular process
ENSDARG00000002167	175	220	10.65	13.77	0.370675129	0.108645163	0.2719685	no	cacnb1	calcium channel, voltage-dependent, beta 1 subunit [Source:ZFIN;Acc:ZDB-GENE-040718-399]	Organismal Systems;Environmental Information Processing	Signal transduction;Circulatory system	ko04010//MAPK signaling pathway;ko04261//Adrenergic signaling in cardiomyocytes;ko04260//Cardiac muscle contraction	K04862	GO:0005623//cell;GO:0005886//plasma membrane;GO:0005575//cellular_component;GO:0071944//cell periphery;GO:0016020//membrane;GO:0044464//cell part	GO:0003674//molecular_function;GO:0022857//transmembrane transporter activity;GO:0005215//transporter activity	GO:0009987//cellular process;GO:0022607//cellular component assembly;GO:0044765//single-organism transport;GO:0055085//transmembrane transport;GO:0051179//localization;GO:1902578//single-organism localization;GO:0016043//cellular component organization;GO:0071840//cellular component organization or biogenesis;GO:0044763//single-organism cellular process;GO:0043933//macromolecular complex subunit …
ENSDARG00000002168	570	589.5	50.335	52.025	0.047643146	0.908162881	1	no	tra2b	transformer 2 beta homolog [Source:ZFIN;Acc:ZDB-GENE-040426-1094]	Genetic Information Processing	Transcription	ko03040//Spliceosome	K12897	-	GO:0005488//binding;GO:0003676//nucleic acid binding;GO:0003674//molecular_function;GO:0003723//RNA binding;GO:0097159//organic cyclic compound binding;GO:1901363//heterocyclic compound binding	-
ENSDARG00000002172	232	176.5	15.695	11.89	-0.400556314	0.047713505	0.149479296	no	aplnra	apelin receptor a [Source:ZFIN;Acc:ZDB-GENE-060929-512]	-	-	-	-	GO:0044464//cell part;GO:0005575//cellular_component;GO:0071944//cell periphery;GO:0005886//plasma membrane;GO:0016020//membrane;GO:0005623//cell	GO:0004871//signal transducer activity;GO:0003674//molecular_function	GO:0065008//regulation of biological quality;GO:0042592//homeostatic process;GO:0050789//regulation of biological process;GO:0044765//single-organism transport;GO:0009790//embryo development;GO:0006464//cellular protein modification process;GO:0023052//signaling;GO:0065007//biological regulation;GO:0044700//single organism signaling;GO:0044238//primary metabolic process;GO:0019538//protein metabo…
ENSDARG00000002174	75	70.5	5.85	5.42	-0.110143773	0.723983406	0.907203279	no	itfg2	integrin alpha FG-GAP repeat containing 2 [Source:ZFIN;Acc:ZDB-GENE-041008-161]	-	-	-	-	-	GO:0003674//molecular_function	-
ENSDARG00000002184	363.5	343	17.615	16.485	-0.095650588	0.589606149	0.809218393	no	igbp1	immunoglobulin (CD79A) binding protein 1 [Source:ZFIN;Acc:ZDB-GENE-040426-2928]	-	-	-	-	GO:0044424//intracellular part;GO:0005622//intracellular;GO:0044464//cell part;GO:0005575//cellular_component;GO:0005737//cytoplasm;GO:0005623//cell;GO:0044444//cytoplasmic part;GO:0005829//cytosol	GO:0019899//enzyme binding;GO:0098772//molecular function regulator;GO:0030234//enzyme regulator activity;GO:0003674//molecular_function;GO:0005488//binding;GO:0005515//protein binding	GO:0019538//protein metabolic process;GO:0007154//cell communication;GO:0044238//primary metabolic process;GO:0050896//response to stimulus;GO:0044699//single-organism process;GO:0044267//cellular protein metabolic process;GO:0044763//single-organism cellular process;GO:0007165//signal transduction;GO:0044700//single organism signaling;GO:0043170//macromolecule metabolic process;GO:0065007//biolo…
ENSDARG00000002190	493.5	588.5	28.7	33.91	0.240660047	0.191494132	0.402181497	no	chmp2bb	charged multivesicular body protein 2Bb [Source:ZFIN;Acc:ZDB-GENE-040426-2539]	Cellular Processes	Transport and catabolism	ko04144//Endocytosis	K12192	GO:0005622//intracellular;GO:0043229//intracellular organelle;GO:0044424//intracellular part;GO:0005575//cellular_component;GO:0005768//endosome;GO:0031410//cytoplasmic vesicle;GO:0005737//cytoplasm;GO:0044444//cytoplasmic part;GO:0043227//membrane-bounded organelle;GO:0043231//intracellular membrane-bounded organelle;GO:0043226//organelle;GO:0031982//vesicle;GO:0012505//endomembrane system;GO:00…	-	GO:0007034//vacuolar transport;GO:0006810//transport;GO:1902582//single-organism intracellular transport;GO:0051234//establishment of localization;GO:0051179//localization;GO:0046907//intracellular transport;GO:0008150//biological_process;GO:0051649//establishment of localization in cell;GO:0044699//single-organism process;GO:0044765//single-organism transport;GO:0051641//cellular localization;GO…
ENSDARG00000002192	34	21	2.3	1.545	-0.574027023	0.073305359	0.205024044	no	aspn	asporin (LRR class 1) [Source:ZFIN;Acc:ZDB-GENE-041105-7]	-	-	-	-	GO:0044424//intracellular part;GO:0044421//extracellular region part;GO:0005622//intracellular;GO:0005623//cell;GO:0044464//cell part;GO:0031012//extracellular matrix;GO:0005737//cytoplasm;GO:0005578//proteinaceous extracellular matrix;GO:0005575//cellular_component;GO:0005576//extracellular region	GO:0098772//molecular function regulator;GO:0005488//binding;GO:0003674//molecular_function;GO:0043167//ion binding;GO:0030234//enzyme regulator activity	GO:0051716//cellular response to stimulus;GO:0044260//cellular macromolecule metabolic process;GO:0050794//regulation of cellular process;GO:0036211//protein modification process;GO:0008152//metabolic process;GO:0044238//primary metabolic process;GO:0019538//protein metabolic process;GO:0043170//macromolecule metabolic process;GO:0044267//cellular protein metabolic process;GO:0008150//biological_…
ENSDARG00000002193	3	0	0.22	0.001	-7.781359714	0.081649851	0.22158944	no	rho	rhodopsin [Source:ZFIN;Acc:ZDB-GENE-990415-271]	Organismal Systems	Sensory system	ko04744//Phototransduction	K04250	GO:0005623//cell;GO:0044464//cell part;GO:0005929//cilium;GO:0043226//organelle;GO:0016020//membrane;GO:0005886//plasma membrane;GO:0042995//cell projection;GO:0071944//cell periphery;GO:0005575//cellular_component	GO:0005488//binding;GO:0008289//lipid binding;GO:0003674//molecular_function;GO:0004871//signal transducer activity	GO:0007154//cell communication;GO:0044700//single organism signaling;GO:0009987//cellular process;GO:0043412//macromolecule modification;GO:0006464//cellular protein modification process;GO:0044763//single-organism cellular process;GO:0050789//regulation of biological process;GO:0050794//regulation of cellular process;GO:0023052//signaling;GO:0051716//cellular response to stimulus;GO:0044699//sin…
ENSDARG00000002194	75	74.5	4.45	4.46	0.003238374	1	1	no	rhd	Rh blood group, D antigen [Source:ZFIN;Acc:ZDB-GENE-051213-1]	-	-	-	-	GO:0016020//membrane;GO:0005623//cell;GO:0071944//cell periphery;GO:0044464//cell part;GO:0005886//plasma membrane;GO:0005575//cellular_component	GO:0003674//molecular_function;GO:0022857//transmembrane transporter activity;GO:0005215//transporter activity	GO:0008150//biological_process;GO:0044765//single-organism transport;GO:0006810//transport;GO:0044699//single-organism process;GO:1902578//single-organism localization;GO:0051234//establishment of localization;GO:0051179//localization;GO:0044763//single-organism cellular process;GO:0055085//transmembrane transport;GO:0009987//cellular process
ENSDARG00000002196	164.5	259.5	3.08	4.81	0.643106543	0.001213605	0.008226343	no	bach1b	BTB and CNC homology 1, basic leucine zipper transcription factor 1 b [Source:ZFIN;Acc:ZDB-GENE-050522-220]	-	-	-	-	GO:0005575//cellular_component;GO:0043227//membrane-bounded organelle;GO:0005622//intracellular;GO:0043231//intracellular membrane-bounded organelle;GO:0005634//nucleus;GO:0044424//intracellular part;GO:0043229//intracellular organelle;GO:0044464//cell part;GO:0043226//organelle;GO:0005623//cell	GO:0003676//nucleic acid binding;GO:1901363//heterocyclic compound binding;GO:0003674//molecular_function;GO:0005488//binding;GO:0003677//DNA binding;GO:0097159//organic cyclic compound binding;GO:0003700//transcription factor activity, sequence-specific DNA binding;GO:0001071//nucleic acid binding transcription factor activity	GO:0006807//nitrogen compound metabolic process;GO:0044237//cellular metabolic process;GO:0034641//cellular nitrogen compound metabolic process;GO:0009058//biosynthetic process;GO:0008150//biological_process;GO:0008152//metabolic process;GO:0009987//cellular process
ENSDARG00000002197	289	70.5	12.245	2.96	-2.048523693	3.57E-12	1.68E-10	yes	pygl	phosphorylase, glycogen, liver [Source:ZFIN;Acc:ZDB-GENE-041205-1]	-	-	-	-	GO:0044464//cell part;GO:0044424//intracellular part;GO:0005622//intracellular;GO:0005575//cellular_component;GO:0005737//cytoplasm;GO:0005623//cell	GO:0003824//catalytic activity;GO:0043167//ion binding;GO:0016757//transferase activity, transferring glycosyl groups;GO:0016740//transferase activity;GO:0003674//molecular_function;GO:0005488//binding	GO:0009056//catabolic process;GO:0008150//biological_process;GO:0009987//cellular process;GO:0044238//primary metabolic process;GO:0071704//organic substance metabolic process;GO:0005975//carbohydrate metabolic process;GO:0044237//cellular metabolic process;GO:0008152//metabolic process;GO:0006091//generation of precursor metabolites and energy
ENSDARG00000002204	48.5	302	5.375	32.95	2.615941805	9.65E-19	1.18E-16	yes	hspb11	heat shock protein beta-11 [Danio rerio]	-	-	-	-	-	-	-
ENSDARG00000002210	36	32	2.16	1.905	-0.181240315	0.666346576	0.863803513	no	stk25a	serine/threonine kinase 25a [Source:ZFIN;Acc:ZDB-GENE-041010-92]	-	-	-	-	-	GO:0016301//kinase activity;GO:0003674//molecular_function;GO:0043167//ion binding;GO:0016740//transferase activity;GO:0016772//transferase activity, transferring phosphorus-containing groups;GO:0003824//catalytic activity;GO:0005488//binding	GO:0048856//anatomical structure development;GO:0044238//primary metabolic process;GO:0019538//protein metabolic process;GO:0032502//developmental process;GO:0040007//growth;GO:0043412//macromolecule modification;GO:0036211//protein modification process;GO:0006464//cellular protein modification process;GO:0044260//cellular macromolecule metabolic process;GO:0043170//macromolecule metabolic proces…
ENSDARG00000002213	81.5	136	2.625	4.2	0.678071905	0.003015223	0.017313387	no	invs	PREDICTED: inversin isoform X1 [Danio rerio]	-	-	-	-	GO:0044464//cell part;GO:0005929//cilium;GO:0042995//cell projection;GO:0043232//intracellular non-membrane-bounded organelle;GO:0044424//intracellular part;GO:0043229//intracellular organelle;GO:0005622//intracellular;GO:0043228//non-membrane-bounded organelle;GO:0043226//organelle;GO:0005623//cell	GO:0005488//binding;GO:0005515//protein binding	GO:0072358//cardiovascular system development;GO:0048568//embryonic organ development;GO:0048731//system development;GO:0048729//tissue morphogenesis;GO:0044707//single-multicellular organism process;GO:0008104//protein localization;GO:0035050//embryonic heart tube development;GO:0033036//macromolecule localization;GO:0048646//anatomical structure formation involved in morphogenesis;GO:0009887//o…
ENSDARG00000002215	907.5	581	48.405	30.69	-0.657387433	0.000232404	0.002054916	no	rtca	RNA 3'-terminal phosphate cyclase [Source:ZFIN;Acc:ZDB-GENE-030131-9687]	-	-	-	-	GO:0044464//cell part;GO:0005634//nucleus;GO:0005623//cell;GO:0043229//intracellular organelle;GO:0005622//intracellular;GO:0043227//membrane-bounded organelle;GO:0005575//cellular_component;GO:0043231//intracellular membrane-bounded organelle;GO:0043226//organelle;GO:0044424//intracellular part	GO:0016874//ligase activity;GO:0043167//ion binding;GO:0003674//molecular_function;GO:0005488//binding;GO:0003824//catalytic activity	GO:0008150//biological_process;GO:0006807//nitrogen compound metabolic process;GO:0034641//cellular nitrogen compound metabolic process;GO:0044237//cellular metabolic process;GO:0008152//metabolic process;GO:0009987//cellular process
ENSDARG00000002216	327.5	506.5	9.78	15.015	0.618498105	0.000373685	0.003067829	no	tbx3a	T-box 3a [Source:ZFIN;Acc:ZDB-GENE-070209-80]	-	-	-	-	GO:0043227//membrane-bounded organelle;GO:0044424//intracellular part;GO:0005575//cellular_component;GO:0005634//nucleus;GO:0043226//organelle;GO:0005623//cell;GO:0044464//cell part;GO:0043231//intracellular membrane-bounded organelle;GO:0005622//intracellular;GO:0043229//intracellular organelle	GO:0001071//nucleic acid binding transcription factor activity;GO:0003700//transcription factor activity, sequence-specific DNA binding;GO:0005488//binding;GO:0003674//molecular_function;GO:0003677//DNA binding;GO:0003676//nucleic acid binding;GO:0097159//organic cyclic compound binding;GO:1901363//heterocyclic compound binding	GO:0048856//anatomical structure development;GO:0008150//biological_process;GO:0009790//embryo development;GO:0007275//multicellular organism development;GO:0008152//metabolic process;GO:0032502//developmental process;GO:0044767//single-organism developmental process;GO:0044699//single-organism process;GO:0044707//single-multicellular organism process;GO:0006807//nitrogen compound metabolic proce…
ENSDARG00000002217	437.5	313.5	15.99	11.35	-0.494477641	0.006386158	0.031847511	no	scocb	short coiled-coil protein B [Danio rerio]	-	-	-	-	GO:0044446//intracellular organelle part;GO:0044444//cytoplasmic part;GO:0005794//Golgi apparatus;GO:0043227//membrane-bounded organelle;GO:0005623//cell;GO:0044431//Golgi apparatus part;GO:0043229//intracellular organelle;GO:0005622//intracellular;GO:0005737//cytoplasm;GO:0012505//endomembrane system;GO:0044424//intracellular part;GO:0043226//organelle;GO:0044464//cell part;GO:0043231//intracell…	-	-
ENSDARG00000002219	3.5	2	0.39	0.195	-1	0.609787139	0.825819011	no	si:dkey-103j14.5	si:dkey-103j14.5 [Source:ZFIN;Acc:ZDB-GENE-090313-170]	-	-	-	-	-	GO:0016810//hydrolase activity, acting on carbon-nitrogen (but not peptide) bonds;GO:0016787//hydrolase activity;GO:0003674//molecular_function;GO:0003824//catalytic activity	-
ENSDARG00000002220	276.5	261	28.955	26.945	-0.10379491	0.648310418	0.85108469	no	zgc:103692	zgc:103692 [Source:ZFIN;Acc:ZDB-GENE-041010-15]	-	-	-	-	GO:0005575//cellular_component	GO:0003674//molecular_function	GO:0008150//biological_process
ENSDARG00000002230	106.5	80	8.38	6.32	-0.407025686	0.076998557	0.212526391	no	sypb	synaptophysin b [Source:ZFIN;Acc:ZDB-GENE-040718-205]	-	-	-	-	GO:0044424//intracellular part;GO:0005622//intracellular;GO:0043229//intracellular organelle;GO:0044444//cytoplasmic part;GO:0031982//vesicle;GO:0043226//organelle;GO:0005623//cell;GO:0005575//cellular_component;GO:0005737//cytoplasm;GO:0044464//cell part;GO:0031410//cytoplasmic vesicle	-	GO:0007154//cell communication;GO:0023052//signaling;GO:0008150//biological_process;GO:0009987//cellular process;GO:0044700//single organism signaling;GO:0007267//cell-cell signaling;GO:0044763//single-organism cellular process;GO:0044699//single-organism process
ENSDARG00000002231	43.5	62.5	4.25	6.06	0.511854952	0.079499443	0.217208231	no	plpp2a	phospholipid phosphatase 2a [Source:ZFIN;Acc:ZDB-GENE-140703-2]	Metabolism	Lipid metabolism	ko00564//Glycerophospholipid metabolism;ko00600//Sphingolipid metabolism;ko00561//Glycerolipid metabolism;ko00565//Ether lipid metabolism	K01080	GO:0044464//cell part;GO:0005886//plasma membrane;GO:0005623//cell;GO:0005575//cellular_component;GO:0016020//membrane;GO:0071944//cell periphery	GO:0016791//phosphatase activity;GO:0003824//catalytic activity;GO:0042578//phosphoric ester hydrolase activity;GO:0003674//molecular_function;GO:0016787//hydrolase activity;GO:0016788//hydrolase activity, acting on ester bonds	GO:0050896//response to stimulus;GO:0008152//metabolic process;GO:0044700//single organism signaling;GO:0044763//single-organism cellular process;GO:0065007//biological regulation;GO:0007154//cell communication;GO:0051716//cellular response to stimulus;GO:0044238//primary metabolic process;GO:0006629//lipid metabolic process;GO:0023052//signaling;GO:0007165//signal transduction;GO:0008150//biolog…
ENSDARG00000002235	428	519	14.085	17.02	0.273071473	0.148888309	0.338912921	no	mmp14a	matrix metallopeptidase 14a (membrane-inserted) [Source:ZFIN;Acc:ZDB-GENE-030901-1]	Organismal Systems	Endocrine system	ko04912//GnRH signaling pathway	K07763	GO:0005575//cellular_component;GO:0005576//extracellular region	GO:0005488//binding;GO:0043167//ion binding;GO:0008233//peptidase activity;GO:0016787//hydrolase activity;GO:0003674//molecular_function;GO:0003824//catalytic activity	GO:0007275//multicellular organism development;GO:0040007//growth;GO:0044763//single-organism cellular process;GO:0008150//biological_process;GO:0051179//localization;GO:0009790//embryo development;GO:0044767//single-organism developmental process;GO:0048856//anatomical structure development;GO:0006950//response to stress;GO:0006928//movement of cell or subcellular component;GO:0000902//cell morp…
ENSDARG00000002240	747.5	810	68.625	73.74	0.103713172	0.555237602	0.77871014	no	psmb6	proteasome subunit beta 6 [Source:ZFIN;Acc:ZDB-GENE-990415-216]	-	-	-	-	GO:0043231//intracellular membrane-bounded organelle;GO:0005622//intracellular;GO:0043234//protein complex;GO:0044464//cell part;GO:0043226//organelle;GO:0005634//nucleus;GO:0032991//macromolecular complex;GO:0043229//intracellular organelle;GO:0044424//intracellular part;GO:0005575//cellular_component;GO:0043227//membrane-bounded organelle;GO:0005623//cell;GO:0005737//cytoplasm	GO:0008233//peptidase activity;GO:0003674//molecular_function;GO:0003824//catalytic activity;GO:0016787//hydrolase activity	GO:0008150//biological_process;GO:0009056//catabolic process;GO:0008152//metabolic process
ENSDARG00000002241	5	1.5	0.39	0.115	-1.761840263	0.135760554	0.318803183	no	kcna2a	potassium voltage-gated channel, shaker-related subfamily, member 2a [Source:ZFIN;Acc:ZDB-GENE-131113-1]	-	-	-	-	GO:0016020//membrane;GO:0071944//cell periphery;GO:0005623//cell;GO:0044464//cell part;GO:0005575//cellular_component;GO:0005886//plasma membrane	GO:0022857//transmembrane transporter activity;GO:0005215//transporter activity;GO:0003674//molecular_function	GO:1902578//single-organism localization;GO:0051179//localization;GO:0016043//cellular component organization;GO:0044765//single-organism transport;GO:0006810//transport;GO:0070271//protein complex biogenesis;GO:0044085//cellular component biogenesis;GO:0055085//transmembrane transport;GO:0051234//establishment of localization;GO:0043933//macromolecular complex subunit organization;GO:0044699//si…
ENSDARG00000002249	49	38	2.485	1.905	-0.383454854	0.258198998	0.494398398	no	tbxas1	thromboxane A synthase 1 (platelet) [Source:ZFIN;Acc:ZDB-GENE-030131-8805]	Metabolism	Lipid metabolism	ko00590//Arachidonic acid metabolism	K01832	GO:0005575//cellular_component	GO:0003674//molecular_function;GO:0016491//oxidoreductase activity;GO:0043167//ion binding;GO:0005488//binding;GO:0003824//catalytic activity	GO:0008150//biological_process
ENSDARG00000002255	185.5	192.5	6.605	6.79	0.039853013	0.823694339	0.974927069	no	epb41l3a	erythrocyte membrane protein band 4.1-like 3a [Source:ZFIN;Acc:ZDB-GENE-040822-8]	Cellular Processes	Cellular commiunity	ko04530//Tight junction	K06107	GO:0005886//plasma membrane;GO:0044464//cell part;GO:0043232//intracellular non-membrane-bounded organelle;GO:0043228//non-membrane-bounded organelle;GO:0043226//organelle;GO:0071944//cell periphery;GO:0005575//cellular_component;GO:0005623//cell;GO:0044424//intracellular part;GO:0005622//intracellular;GO:0043229//intracellular organelle;GO:0016020//membrane;GO:0005856//cytoskeleton	GO:0005515//protein binding;GO:0008092//cytoskeletal protein binding;GO:0005198//structural molecule activity;GO:0005488//binding;GO:0003674//molecular_function	GO:0008150//biological_process;GO:0007010//cytoskeleton organization;GO:0016043//cellular component organization;GO:0071840//cellular component organization or biogenesis;GO:0040007//growth;GO:0006996//organelle organization;GO:0009987//cellular process
ENSDARG00000002259	9	5.5	0.625	0.375	-0.736965594	0.353271212	0.599276058	no	ca15c	carbonic anhydrase XV c [Source:ZFIN;Acc:ZDB-GENE-061013-737]	-	-	-	-	GO:0005575//cellular_component	GO:0003674//molecular_function;GO:0016829//lyase activity;GO:0005488//binding;GO:0003824//catalytic activity;GO:0043167//ion binding	GO:0008152//metabolic process;GO:0044699//single-organism process;GO:0044710//single-organism metabolic process;GO:0008150//biological_process;GO:0044281//small molecule metabolic process
ENSDARG00000002264	91.5	100.5	18.81	20.405	0.117422862	0.681616521	0.876418665	no	mrpl41	39S ribosomal protein L41, mitochondrial precursor [Danio rerio]	-	-	-	-	GO:1990904//ribonucleoprotein complex;GO:0044464//cell part;GO:0043226//organelle;GO:0005622//intracellular;GO:0044424//intracellular part;GO:0032991//macromolecular complex;GO:0043227//membrane-bounded organelle;GO:0005623//cell;GO:0043229//intracellular organelle;GO:0043231//intracellular membrane-bounded organelle;GO:0030529//intracellular ribonucleoprotein complex	GO:0005198//structural molecule activity	GO:0016265//death;GO:0008152//metabolic process;GO:0010467//gene expression;GO:0009987//cellular process;GO:0044763//single-organism cellular process;GO:0071704//organic substance metabolic process;GO:0043170//macromolecule metabolic process;GO:0012501//programmed cell death;GO:0008219//cell death;GO:0044699//single-organism process
ENSDARG00000002267	321.5	680.5	21.335	44.84	1.071564168	5.23E-09	1.41E-07	yes	dcaf13	DDB1- and CUL4-associated factor 13 [Danio rerio]	-	-	-	-	GO:0070013//intracellular organelle lumen;GO:0043234//protein complex;GO:0043227//membrane-bounded organelle;GO:0005623//cell;GO:0044446//intracellular organelle part;GO:0005634//nucleus;GO:0031461//cullin-RING ubiquitin ligase complex;GO:0043229//intracellular organelle;GO:1990234//transferase complex;GO:1902494//catalytic complex;GO:0031981//nuclear lumen;GO:0032991//macromolecular complex;GO:0…	-	GO:0006464//cellular protein modification process;GO:0044260//cellular macromolecule metabolic process;GO:0044238//primary metabolic process;GO:0044085//cellular component biogenesis;GO:0044237//cellular metabolic process;GO:0070647//protein modification by small protein conjugation or removal;GO:0043412//macromolecule modification;GO:0042254//ribosome biogenesis;GO:0008152//metabolic process;GO:…
ENSDARG00000002271	555.5	370.5	57.41	37.635	-0.609227084	0.001026537	0.007174505	no	zfand5b	zinc finger, AN1-type domain 5b [Source:ZFIN;Acc:ZDB-GENE-040426-875]	-	-	-	-	-	GO:0005488//binding;GO:0003674//molecular_function;GO:0003676//nucleic acid binding;GO:1901363//heterocyclic compound binding;GO:0097159//organic cyclic compound binding;GO:0003677//DNA binding;GO:0043167//ion binding	-
ENSDARG00000002285	167	195.5	3.435	3.99	0.216078647	0.279841849	0.517528107	no	mcoln1a	mucolipin 1a [Source:ZFIN;Acc:ZDB-GENE-040426-2704]	-	-	-	-	GO:0043231//intracellular membrane-bounded organelle;GO:0000323//lytic vacuole;GO:0005622//intracellular;GO:0043229//intracellular organelle;GO:0031982//vesicle;GO:0005768//endosome;GO:0005737//cytoplasm;GO:0012505//endomembrane system;GO:0005623//cell;GO:0005773//vacuole;GO:0043227//membrane-bounded organelle;GO:0043226//organelle;GO:0044464//cell part;GO:0005575//cellular_component;GO:0044424//…	GO:0003674//molecular_function	GO:0008150//biological_process
ENSDARG00000002293	18.5	13	1.85	1.305	-0.503475464	0.292776114	0.532937005	no	si:ch211-197g15.6	si:ch211-197g15.6 [Source:ZFIN;Acc:ZDB-GENE-050208-457]	-	-	-	-	-	GO:0043167//ion binding;GO:0003674//molecular_function;GO:0005488//binding	-
ENSDARG00000002295	4	11	0.14	0.385	1.459431619	0.141029602	0.327489546	no	si:dkey-21p1.3	si:dkey-21p1.3 [Source:ZFIN;Acc:ZDB-GENE-081105-162]	-	-	-	-	-	GO:0005198//structural molecule activity;GO:0003674//molecular_function	-
ENSDARG00000002298	19.5	27	2.03	2.78	0.453605156	0.311870851	0.552618063	no	ankrd22	ankyrin repeat domain 22 [Source:ZFIN;Acc:ZDB-GENE-040426-1120]	-	-	-	-	GO:0005575//cellular_component	GO:0003674//molecular_function	GO:0008150//biological_process
ENSDARG00000002299	25	38	2.25	3.295	0.550353464	0.112828722	0.279362796	no	arsh	arylsulfatase H [Source:ZFIN;Acc:ZDB-GENE-081104-120]	-	-	-	-	GO:0005575//cellular_component	GO:0003674//molecular_function	GO:0008150//biological_process
ENSDARG00000002300	0.5	1	0.045	0.085	0.91753784	1	1	no	p2rx2	purinergic receptor P2X, ligand-gated ion channel, 2 [Source:ZFIN;Acc:ZDB-GENE-030319-2]	Environmental Information Processing	Signal transduction;Signaling molecules and interaction	ko04080//Neuroactive ligand-receptor interaction;ko04020//Calcium signaling pathway	K05216	GO:0044428//nuclear part;GO:0043231//intracellular membrane-bounded organelle;GO:0005634//nucleus;GO:0043229//intracellular organelle;GO:0012505//endomembrane system;GO:0016020//membrane;GO:0044446//intracellular organelle part;GO:0005635//nuclear envelope;GO:0005575//cellular_component;GO:0031975//envelope;GO:0044464//cell part;GO:0005886//plasma membrane;GO:0043227//membrane-bounded organelle;G…	GO:0004871//signal transducer activity;GO:0022857//transmembrane transporter activity;GO:0005488//binding;GO:0005215//transporter activity;GO:0003674//molecular_function;GO:0043167//ion binding	GO:0009987//cellular process;GO:0044765//single-organism transport;GO:0044700//single organism signaling;GO:0051179//localization;GO:0023052//signaling;GO:0007154//cell communication;GO:1902578//single-organism localization;GO:0050789//regulation of biological process;GO:0007165//signal transduction;GO:0006810//transport;GO:0055085//transmembrane transport;GO:0008150//biological_process;GO:004469…
ENSDARG00000002304	90	122	12.215	16.385	0.423721809	0.095562598	0.247760882	no	gins2	GINS complex subunit 2 [Source:ZFIN;Acc:ZDB-GENE-050419-19]	-	-	-	-	GO:0043229//intracellular organelle;GO:0043226//organelle;GO:0043234//protein complex;GO:0044464//cell part;GO:0043231//intracellular membrane-bounded organelle;GO:0005654//nucleoplasm;GO:0044428//nuclear part;GO:0005623//cell;GO:0005634//nucleus;GO:0032991//macromolecular complex;GO:0044446//intracellular organelle part;GO:0043228//non-membrane-bounded organelle;GO:0005622//intracellular;GO:0000…	GO:0004386//helicase activity;GO:0017111//nucleoside-triphosphatase activity;GO:0003824//catalytic activity;GO:0003674//molecular_function;GO:0016462//pyrophosphatase activity;GO:0016787//hydrolase activity;GO:0016817//hydrolase activity, acting on acid anhydrides;GO:0016818//hydrolase activity, acting on acid anhydrides, in phosphorus-containing anhydrides	GO:0007049//cell cycle;GO:0071840//cellular component organization or biogenesis;GO:0050896//response to stimulus;GO:0044260//cellular macromolecule metabolic process;GO:0006950//response to stress;GO:0044237//cellular metabolic process;GO:0008152//metabolic process;GO:1901360//organic cyclic compound metabolic process;GO:0009987//cellular process;GO:0090304//nucleic acid metabolic process;GO:000…
ENSDARG00000002305	723	538.5	29.525	21.85	-0.43430378	0.013495876	0.057526077	no	me3	malic enzyme 3, NADP(+)-dependent, mitochondrial [Source:ZFIN;Acc:ZDB-GENE-041111-294]	Metabolism	Global and Overview;Carbohydrate metabolism	ko01200//Carbon metabolism;ko00620//Pyruvate metabolism	K00029	GO:0043226//organelle;GO:0043227//membrane-bounded organelle;GO:0005739//mitochondrion;GO:0005737//cytoplasm;GO:0044444//cytoplasmic part;GO:0043231//intracellular membrane-bounded organelle;GO:0005575//cellular_component;GO:0044464//cell part;GO:0044424//intracellular part;GO:0005622//intracellular;GO:0005623//cell;GO:0043229//intracellular organelle	GO:0043167//ion binding;GO:0003674//molecular_function;GO:0005488//binding;GO:0016491//oxidoreductase activity;GO:0003824//catalytic activity	GO:0044710//single-organism metabolic process;GO:0044281//small molecule metabolic process;GO:0008152//metabolic process;GO:0044699//single-organism process;GO:0008150//biological_process
ENSDARG00000002311	49.405	5.5	8.93	0.97	-3.202603523	2.56E-07	4.88E-06	yes	fabp11b	fatty acid binding protein 11b [Source:ZFIN;Acc:ZDB-GENE-050522-391]	-	-	-	-	GO:0005575//cellular_component	GO:0003674//molecular_function;GO:0008289//lipid binding;GO:0005488//binding	GO:0008150//biological_process
ENSDARG00000002330	32	15	2.495	1.135	-1.136347518	0.037246555	0.124131076	no	lhx8a	LIM homeobox 8a [Source:ZFIN;Acc:ZDB-GENE-031008-2]	-	-	-	-	GO:0043226//organelle;GO:0044424//intracellular part;GO:0005623//cell;GO:0043231//intracellular membrane-bounded organelle;GO:0005622//intracellular;GO:0044464//cell part;GO:0005634//nucleus;GO:0043227//membrane-bounded organelle;GO:0005575//cellular_component;GO:0043229//intracellular organelle	GO:0003674//molecular_function;GO:0001071//nucleic acid binding transcription factor activity;GO:0003676//nucleic acid binding;GO:0003677//DNA binding;GO:0097159//organic cyclic compound binding;GO:0043167//ion binding;GO:0003700//transcription factor activity, sequence-specific DNA binding;GO:1901363//heterocyclic compound binding;GO:0005488//binding	GO:0008150//biological_process;GO:0009987//cellular process;GO:0009058//biosynthetic process;GO:0006807//nitrogen compound metabolic process;GO:0034641//cellular nitrogen compound metabolic process;GO:0044237//cellular metabolic process;GO:0008152//metabolic process
ENSDARG00000002332	200	250.5	7.83	9.715	0.311201688	0.09818962	0.252585574	no	frmd6	FERM domain containing 6 [Source:ZFIN;Acc:ZDB-GENE-050522-354]	-	-	-	-	GO:0044424//intracellular part;GO:0005856//cytoskeleton;GO:0043228//non-membrane-bounded organelle;GO:0043232//intracellular non-membrane-bounded organelle;GO:0043229//intracellular organelle;GO:0043226//organelle;GO:0005623//cell;GO:0005622//intracellular;GO:0044464//cell part;GO:0005575//cellular_component	GO:0005198//structural molecule activity;GO:0003674//molecular_function	GO:0008150//biological_process;GO:0016043//cellular component organization;GO:0009987//cellular process;GO:0006996//organelle organization;GO:0071840//cellular component organization or biogenesis;GO:0007010//cytoskeleton organization
ENSDARG00000002333	60	42.5	4.705	3.335	-0.496507962	0.122782018	0.296114505	no	fam102bb	PREDICTED: protein FAM102B-like [Sinocyclocheilus anshuiensis]	-	-	-	-	-	-	-
ENSDARG00000002336	755.5	378	24.45	12.155	-1.008284572	7.36E-08	1.56E-06	yes	dlc	deltaC [Source:ZFIN;Acc:ZDB-GENE-000125-4]	Environmental Information Processing	Signal transduction	ko04330//Notch signaling pathway	K06051	GO:0005575//cellular_component	GO:0043167//ion binding;GO:0005488//binding;GO:0003674//molecular_function	GO:0032502//developmental process;GO:0008150//biological_process;GO:0048856//anatomical structure development
ENSDARG00000002339	114.5	99.5	10.22	9.13	-0.162708431	0.365311368	0.612724367	no	sgf29	SAGA complex associated factor 29 [Source:ZFIN;Acc:ZDB-GENE-041010-62]	-	-	-	-	GO:0005622//intracellular;GO:0031974//membrane-enclosed lumen;GO:0043233//organelle lumen;GO:0044422//organelle part;GO:0044428//nuclear part;GO:0044424//intracellular part;GO:0044464//cell part;GO:0005623//cell;GO:0031981//nuclear lumen;GO:0043234//protein complex;GO:0043231//intracellular membrane-bounded organelle;GO:0070013//intracellular organelle lumen;GO:0044446//intracellular organelle pa…	-	-
ENSDARG00000002344	10204	8559	732.085	608.53	-0.266682777	0.120398949	0.292550448	no	tubb4b	tubulin, beta 4B class IVb [Source:ZFIN;Acc:ZDB-GENE-030131-8625]	Cellular Processes	Transport and catabolism;Cellular commiunity	ko04145//Phagosome;ko04540//Gap junction	K07375	GO:0043232//intracellular non-membrane-bounded organelle;GO:0005575//cellular_component;GO:0043226//organelle;GO:0005737//cytoplasm;GO:0043229//intracellular organelle;GO:0044424//intracellular part;GO:0005856//cytoskeleton;GO:0005622//intracellular;GO:0005623//cell;GO:0043228//non-membrane-bounded organelle;GO:0044464//cell part	GO:0005488//binding;GO:0016817//hydrolase activity, acting on acid anhydrides;GO:0005198//structural molecule activity;GO:0016818//hydrolase activity, acting on acid anhydrides, in phosphorus-containing anhydrides;GO:0003824//catalytic activity;GO:0017111//nucleoside-triphosphatase activity;GO:0003924//GTPase activity;GO:0016787//hydrolase activity;GO:0003674//molecular_function;GO:0043167//ion b…	GO:0007010//cytoskeleton organization;GO:0022607//cellular component assembly;GO:0006996//organelle organization;GO:0009987//cellular process;GO:0071840//cellular component organization or biogenesis;GO:0008150//biological_process;GO:0016043//cellular component organization;GO:0044085//cellular component biogenesis
ENSDARG00000002347	0.5	2	0.025	0.17	2.765534746	0.405973902	0.651881958	no	cyp11a1	cytochrome P450, family 11, subfamily A, polypeptide 1 [Source:ZFIN;Acc:ZDB-GENE-010306-1]	Metabolism	Lipid metabolism	ko00140//Steroid hormone biosynthesis	K00498	GO:0005622//intracellular;GO:0005737//cytoplasm;GO:0005623//cell;GO:0044464//cell part;GO:0043227//membrane-bounded organelle;GO:0005739//mitochondrion;GO:0043231//intracellular membrane-bounded organelle;GO:0044444//cytoplasmic part;GO:0044424//intracellular part;GO:0043226//organelle;GO:0043229//intracellular organelle;GO:0005575//cellular_component	GO:0003824//catalytic activity;GO:0005488//binding;GO:0016491//oxidoreductase activity;GO:0043167//ion binding;GO:0003674//molecular_function	GO:0007010//cytoskeleton organization;GO:0009987//cellular process;GO:0044085//cellular component biogenesis;GO:0048856//anatomical structure development;GO:0032502//developmental process;GO:0044710//single-organism metabolic process;GO:0044238//primary metabolic process;GO:0016043//cellular component organization;GO:0008152//metabolic process;GO:0065003//macromolecular complex assembly;GO:007027…
ENSDARG00000002353	3	6.5	0.15	0.315	1.070389328	0.221773618	0.44488509	no	tagapa	T cell activation RhoGTPase activating protein a [Source:ZFIN;Acc:ZDB-GENE-040426-1877]	-	-	-	-	-	-	GO:0051716//cellular response to stimulus;GO:0044700//single organism signaling;GO:0050789//regulation of biological process;GO:0007165//signal transduction;GO:0050794//regulation of cellular process;GO:0008150//biological_process;GO:0050896//response to stimulus;GO:0065007//biological regulation;GO:0023052//signaling;GO:0044763//single-organism cellular process;GO:0007154//cell communication;GO:…
ENSDARG00000002355	9.5	19.5	0.785	1.565	0.995398098	0.041501792	0.134995551	no	shpk	sedoheptulokinase [Source:ZFIN;Acc:ZDB-GENE-060526-357]	-	-	-	-	GO:0005623//cell;GO:0044424//intracellular part;GO:0005575//cellular_component;GO:0005737//cytoplasm;GO:0005622//intracellular;GO:0044464//cell part	GO:0016772//transferase activity, transferring phosphorus-containing groups;GO:0003674//molecular_function;GO:0016740//transferase activity;GO:0003824//catalytic activity;GO:0016301//kinase activity	GO:0008150//biological_process;GO:0008152//metabolic process;GO:0005975//carbohydrate metabolic process;GO:0044238//primary metabolic process;GO:0071704//organic substance metabolic process
ENSDARG00000002362	229	204	14.08	12.48	-0.1740294	0.378379677	0.626220548	no	ubald1a	UBA-like domain containing 1a [Source:ZFIN;Acc:ZDB-GENE-040718-191]	-	-	-	-	GO:0005575//cellular_component	-	-
ENSDARG00000002365	230	309	12.33	16.395	0.411083102	0.029328561	0.104122517	no	cers5	ceramide synthase 5 [Source:ZFIN;Acc:ZDB-GENE-030131-1740]	-	-	-	-	GO:0043226//organelle;GO:0005737//cytoplasm;GO:0012505//endomembrane system;GO:0043231//intracellular membrane-bounded organelle;GO:0005622//intracellular;GO:0005575//cellular_component;GO:0005783//endoplasmic reticulum;GO:0043227//membrane-bounded organelle;GO:0043229//intracellular organelle;GO:0005623//cell;GO:0005634//nucleus;GO:0044424//intracellular part;GO:0044464//cell part;GO:0044444//cy…	GO:0016746//transferase activity, transferring acyl groups;GO:0003824//catalytic activity;GO:0097159//organic cyclic compound binding;GO:1901363//heterocyclic compound binding;GO:0003676//nucleic acid binding;GO:0003677//DNA binding;GO:0016740//transferase activity;GO:0003674//molecular_function;GO:0005488//binding	GO:0071704//organic substance metabolic process;GO:0044710//single-organism metabolic process;GO:0009987//cellular process;GO:0006629//lipid metabolic process;GO:0044237//cellular metabolic process;GO:0044238//primary metabolic process;GO:0034641//cellular nitrogen compound metabolic process;GO:0008150//biological_process;GO:0006807//nitrogen compound metabolic process;GO:0009058//biosynthetic pr…
ENSDARG00000002369	4276.56	3406.945	299.55	236.285	-0.342268787	0.050911873	0.156843842	no	si:ch211-202a12.4	polyubiquitin [Cricetulus sp.]	Organismal Systems	Endocrine system	ko03320//PPAR signaling pathway	K08770	GO:0043227//membrane-bounded organelle;GO:0005622//intracellular;GO:0043231//intracellular membrane-bounded organelle;GO:0043229//intracellular organelle;GO:0005623//cell;GO:0044464//cell part;GO:0044424//intracellular part;GO:0043226//organelle	GO:0003723//RNA binding;GO:1901363//heterocyclic compound binding;GO:0005488//binding;GO:0003676//nucleic acid binding;GO:0097159//organic cyclic compound binding	GO:0006508//proteolysis;GO:0044257//cellular protein catabolic process;GO:0019941//modification-dependent protein catabolic process;GO:0065007//biological regulation;GO:0008152//metabolic process;GO:0030163//protein catabolic process;GO:0009987//cellular process;GO:0043632//modification-dependent macromolecule catabolic process;GO:0044260//cellular macromolecule metabolic process;GO:0019538//prot…
ENSDARG00000002377	167.5	176	13.21	13.105	-0.011513113	0.787683018	0.950211911	no	mief2	mitochondrial elongation factor 2 [Source:ZFIN;Acc:ZDB-GENE-060929-864]	-	-	-	-	GO:0005575//cellular_component	GO:0003674//molecular_function	GO:0008150//biological_process
ENSDARG00000002385	205	371.5	2.75	4.85	0.818553129	6.65E-05	0.000704025	no	atm	ATM serine/threonine kinase [Source:ZFIN;Acc:ZDB-GENE-040809-1]	Environmental Information Processing;Cellular Processes	Cell growth and death;Signal transduction	ko04068//FoxO signaling pathway;ko04110//Cell cycle;ko04210//Apoptosis;ko04115//p53 signaling pathway	K04728	GO:0005623//cell;GO:0044464//cell part;GO:0005575//cellular_component;GO:0005622//intracellular	GO:0003824//catalytic activity;GO:0016740//transferase activity;GO:0016301//kinase activity;GO:0003674//molecular_function;GO:0043167//ion binding;GO:0016772//transferase activity, transferring phosphorus-containing groups;GO:0005488//binding	GO:0006725//cellular aromatic compound metabolic process;GO:0050794//regulation of cellular process;GO:0044767//single-organism developmental process;GO:0065008//regulation of biological quality;GO:0036211//protein modification process;GO:0006464//cellular protein modification process;GO:0044238//primary metabolic process;GO:0071704//organic substance metabolic process;GO:0006950//response to str…
ENSDARG00000002391	16.5	30	1.77	3.17	0.84073348	0.056871945	0.17011169	no	tlcd1	TLC domain containing 1 [Source:ZFIN;Acc:ZDB-GENE-041010-173]	-	-	-	-	GO:0005575//cellular_component	GO:0003674//molecular_function	GO:0008150//biological_process
ENSDARG00000002394	1.5	2.5	0.115	0.185	0.68589141	0.753084281	0.927527371	no	ugt5d1	UDP glucuronosyltransferase 5 family, polypeptide D1 [Source:ZFIN;Acc:ZDB-GENE-091118-36]	-	-	-	-	GO:0005623//cell;GO:0005575//cellular_component;GO:0043226//organelle;GO:0044464//cell part;GO:0005622//intracellular	GO:0003824//catalytic activity;GO:0016757//transferase activity, transferring glycosyl groups;GO:0003674//molecular_function;GO:0016740//transferase activity	GO:0008150//biological_process
ENSDARG00000002396	41	85.5	2.32	4.8	1.0489096	0.00021939	0.001954472	yes	cry-dash	cryptochrome DASH [Source:ZFIN;Acc:ZDB-GENE-040617-2]	-	-	-	-	-	GO:0016829//lyase activity;GO:0003674//molecular_function;GO:0003824//catalytic activity	GO:0044260//cellular macromolecule metabolic process;GO:0006807//nitrogen compound metabolic process;GO:1901360//organic cyclic compound metabolic process;GO:0006950//response to stress;GO:0006259//DNA metabolic process;GO:0071704//organic substance metabolic process;GO:0044238//primary metabolic process;GO:0009987//cellular process;GO:0034641//cellular nitrogen compound metabolic process;GO:0050…
ENSDARG00000002401	231.015	187.5	18.03	14.495	-0.314844063	0.119964697	0.29177337	no	gale	UDP-galactose-4-epimerase [Source:ZFIN;Acc:ZDB-GENE-060421-6479]	Metabolism	Carbohydrate metabolism	ko00520//Amino sugar and nucleotide sugar metabolism;ko00052//Galactose metabolism	K01784	GO:0005575//cellular_component	GO:0003824//catalytic activity;GO:0016853//isomerase activity;GO:0003674//molecular_function	GO:0008152//metabolic process;GO:0044699//single-organism process;GO:0044238//primary metabolic process;GO:0044281//small molecule metabolic process;GO:0044710//single-organism metabolic process;GO:0005975//carbohydrate metabolic process;GO:0008150//biological_process;GO:0071704//organic substance metabolic process
ENSDARG00000002402	282	237.5	11.79	9.845	-0.260100607	0.224213356	0.44828995	no	ercc3	excision repair cross-complementation group 3 [Source:ZFIN;Acc:ZDB-GENE-030131-3043]	Genetic Information Processing	Replication and repair;Transcription	ko03022//Basal transcription factors;ko03420//Nucleotide excision repair	K10843	-	GO:0016887//ATPase activity;GO:0005488//binding;GO:0097159//organic cyclic compound binding;GO:0004386//helicase activity;GO:0017111//nucleoside-triphosphatase activity;GO:1901363//heterocyclic compound binding;GO:0016818//hydrolase activity, acting on acid anhydrides, in phosphorus-containing anhydrides;GO:0043167//ion binding;GO:0003824//catalytic activity;GO:0003676//nucleic acid binding;GO:00…	GO:0006139//nucleobase-containing compound metabolic process;GO:0090304//nucleic acid metabolic process;GO:0006996//organelle organization;GO:0009987//cellular process;GO:0034641//cellular nitrogen compound metabolic process;GO:0006950//response to stress;GO:0006725//cellular aromatic compound metabolic process;GO:0051276//chromosome organization;GO:0046483//heterocycle metabolic process;GO:00718…
ENSDARG00000002403	1891.5	1014.5	113.56	60.31	-0.912985614	1.65E-06	2.63E-05	no	nusap1	nucleolar and spindle associated protein 1 [Source:ZFIN;Acc:ZDB-GENE-030827-5]	-	-	-	-	GO:0005856//cytoskeleton;GO:0043227//membrane-bounded organelle;GO:0005575//cellular_component;GO:0043231//intracellular membrane-bounded organelle;GO:0005634//nucleus;GO:0005623//cell;GO:0043229//intracellular organelle;GO:0005622//intracellular;GO:0043228//non-membrane-bounded organelle;GO:0043232//intracellular non-membrane-bounded organelle;GO:0044464//cell part;GO:0043226//organelle;GO:00057…	GO:0003674//molecular_function;GO:0005488//binding;GO:0003677//DNA binding;GO:0097159//organic cyclic compound binding;GO:1901363//heterocyclic compound binding;GO:0003676//nucleic acid binding	GO:0048870//cell motility;GO:0009987//cellular process;GO:0051301//cell division;GO:0006928//movement of cell or subcellular component;GO:0007010//cytoskeleton organization;GO:0044699//single-organism process;GO:0071840//cellular component organization or biogenesis;GO:0051674//localization of cell;GO:0048869//cellular developmental process;GO:0040011//locomotion;GO:0044767//single-organism devel…
ENSDARG00000002405	41.5	62	1.235	1.835	0.571269021	0.058584299	0.173809519	no	si:ch211-225b11.1	si:ch211-225b11.1 [Source:ZFIN;Acc:ZDB-GENE-060531-39]	-	-	-	-	GO:0005575//cellular_component;GO:0071944//cell periphery;GO:0005886//plasma membrane;GO:0016020//membrane;GO:0005623//cell;GO:0044464//cell part	GO:0022857//transmembrane transporter activity;GO:0003674//molecular_function;GO:0005215//transporter activity	GO:1902578//single-organism localization;GO:0044763//single-organism cellular process;GO:0008150//biological_process;GO:0006810//transport;GO:0055085//transmembrane transport;GO:0009987//cellular process;GO:0044765//single-organism transport;GO:0044699//single-organism process;GO:0051234//establishment of localization;GO:0051179//localization
ENSDARG00000002406	21.5	51	1.62	3.815	1.235689244	0.000224315	0.001995696	yes	zmynd10	zinc finger, MYND-type containing 10 [Source:ZFIN;Acc:ZDB-GENE-040426-1218]	-	-	-	-	GO:0043226//organelle;GO:0044424//intracellular part;GO:0005575//cellular_component;GO:0043228//non-membrane-bounded organelle;GO:0015630//microtubule cytoskeleton;GO:0005622//intracellular;GO:0005623//cell;GO:0005856//cytoskeleton;GO:0043229//intracellular organelle;GO:0005815//microtubule organizing center;GO:0005737//cytoplasm;GO:0043232//intracellular non-membrane-bounded organelle;GO:0044430…	GO:0003674//molecular_function;GO:0043167//ion binding;GO:0005488//binding	GO:0008150//biological_process;GO:0022607//cellular component assembly;GO:0065003//macromolecular complex assembly;GO:0071840//cellular component organization or biogenesis;GO:0006996//organelle organization;GO:0006461//protein complex assembly;GO:0044085//cellular component biogenesis;GO:0009987//cellular process;GO:0070271//protein complex biogenesis;GO:0007010//cytoskeleton organization;GO:004…
ENSDARG00000002411	44.5	59	2.22	2.765	0.316719804	0.187193177	0.395647334	no	pde4cb	phosphodiesterase 4C, cAMP-specific b [Source:ZFIN;Acc:ZDB-GENE-030131-4075]	-	-	-	-	-	GO:0003674//molecular_function;GO:0043167//ion binding;GO:0005488//binding	GO:0044699//single-organism process;GO:0023052//signaling;GO:0051716//cellular response to stimulus;GO:0007165//signal transduction;GO:0008150//biological_process;GO:0050789//regulation of biological process;GO:0044700//single organism signaling;GO:0007154//cell communication;GO:0065007//biological regulation;GO:0009987//cellular process;GO:0044763//single-organism cellular process;GO:0050794//re…
ENSDARG00000002445	288	394	9	12.225	0.441837559	0.01565986	0.064573753	no	prdm1a	PR domain containing 1a, with ZNF domain [Source:ZFIN;Acc:ZDB-GENE-030131-2193]	-	-	-	-	-	GO:0003700//transcription factor activity, sequence-specific DNA binding;GO:0003674//molecular_function;GO:0001071//nucleic acid binding transcription factor activity	GO:0009058//biosynthetic process;GO:0006807//nitrogen compound metabolic process;GO:0048856//anatomical structure development;GO:0044763//single-organism cellular process;GO:0044237//cellular metabolic process;GO:0009987//cellular process;GO:0030154//cell differentiation;GO:0008152//metabolic process;GO:0032502//developmental process;GO:0032501//multicellular organismal process;GO:0044707//single…
ENSDARG00000002463	130.5	180.5	5.545	7.21	0.378811799	0.031836319	0.11042847	no	arhgef37	Rho guanine nucleotide exchange factor (GEF) 37 [Source:ZFIN;Acc:ZDB-GENE-100514-3]	-	-	-	-	GO:0044464//cell part;GO:0044424//intracellular part;GO:0005575//cellular_component;GO:0005737//cytoplasm;GO:0005623//cell;GO:0005622//intracellular	GO:0003674//molecular_function;GO:0019899//enzyme binding;GO:0005515//protein binding;GO:0005488//binding	GO:0051716//cellular response to stimulus;GO:0065007//biological regulation;GO:0050789//regulation of biological process;GO:0050794//regulation of cellular process;GO:0008150//biological_process;GO:0009987//cellular process;GO:0007154//cell communication;GO:0007165//signal transduction;GO:0050896//response to stimulus;GO:0023052//signaling;GO:0044700//single organism signaling;GO:0044699//single-…
ENSDARG00000002467	67.5	128	4.39	8.26	0.911920842	0.000196151	0.00177402	no	rdh14b	retinol dehydrogenase 14b [Source:ZFIN;Acc:ZDB-GENE-030131-6605]	-	-	-	-	GO:0005575//cellular_component	GO:0003824//catalytic activity;GO:0016491//oxidoreductase activity;GO:0003674//molecular_function	GO:0008150//biological_process
ENSDARG00000002479	751.5	530.5	18.465	12.875	-0.52022083	0.018148499	0.071969807	no	ercc6l	excision repair cross-complementation group 6-like [Source:ZFIN;Acc:ZDB-GENE-060531-56]	-	-	-	-	GO:0005694//chromosome;GO:0043232//intracellular non-membrane-bounded organelle;GO:0043226//organelle;GO:0005623//cell;GO:0005575//cellular_component;GO:0043229//intracellular organelle;GO:0043234//protein complex;GO:0043228//non-membrane-bounded organelle;GO:0044424//intracellular part;GO:0032991//macromolecular complex;GO:0005622//intracellular;GO:0044464//cell part	GO:0005488//binding;GO:0097159//organic cyclic compound binding;GO:1901363//heterocyclic compound binding;GO:0003677//DNA binding;GO:0003674//molecular_function;GO:0003824//catalytic activity;GO:0004386//helicase activity;GO:0016462//pyrophosphatase activity;GO:0016817//hydrolase activity, acting on acid anhydrides;GO:0017111//nucleoside-triphosphatase activity;GO:0043167//ion binding;GO:0016787/…	GO:0010467//gene expression;GO:0071704//organic substance metabolic process;GO:0008152//metabolic process;GO:0044238//primary metabolic process;GO:0009987//cellular process;GO:0051301//cell division;GO:0051604//protein maturation;GO:0008150//biological_process;GO:0043170//macromolecule metabolic process;GO:0044699//single-organism process;GO:0019538//protein metabolic process;GO:0044763//single-o…
ENSDARG00000002483	15	24	1.58	2.31	0.547968293	0.213082501	0.433130579	no	wnt7ab	wingless-type MMTV integration site family, member 7Ab [Source:ZFIN;Acc:ZDB-GENE-100922-44]	-	-	-	-	GO:0005575//cellular_component;GO:0005578//proteinaceous extracellular matrix;GO:0044421//extracellular region part;GO:0005576//extracellular region;GO:0005615//extracellular space;GO:0031012//extracellular matrix	GO:0003674//molecular_function	GO:0044699//single-organism process;GO:0044763//single-organism cellular process;GO:0008150//biological_process;GO:0009987//cellular process;GO:0048869//cellular developmental process;GO:0007154//cell communication;GO:0044700//single organism signaling;GO:0030154//cell differentiation;GO:0032502//developmental process;GO:0050794//regulation of cellular process;GO:0051716//cellular response to sti…
ENSDARG00000002487	274	690	12.325	30.805	1.321576889	3.34E-13	1.83E-11	yes	noc3l	NOC3-like DNA replication regulator [Source:ZFIN;Acc:ZDB-GENE-030131-9878]	-	-	-	-	GO:0005575//cellular_component;GO:0005730//nucleolus;GO:0031981//nuclear lumen;GO:0043227//membrane-bounded organelle;GO:0044428//nuclear part;GO:0043233//organelle lumen;GO:0043232//intracellular non-membrane-bounded organelle;GO:0005623//cell;GO:0044464//cell part;GO:0005634//nucleus;GO:0044446//intracellular organelle part;GO:0005622//intracellular;GO:0044424//intracellular part;GO:0043228//no…	GO:0003674//molecular_function	GO:0044710//single-organism metabolic process;GO:0008152//metabolic process;GO:0071704//organic substance metabolic process;GO:0048856//anatomical structure development;GO:0008150//biological_process;GO:0032502//developmental process;GO:0006629//lipid metabolic process;GO:0044238//primary metabolic process;GO:0044699//single-organism process
ENSDARG00000002494	107.5	186.5	5.11	9.26	0.857688902	0.000329447	0.002762912	no	itgb6	integrin, beta 6 [Source:ZFIN;Acc:ZDB-GENE-100812-2]	Environmental Information Processing;Cellular Processes	Cell motility;Signaling molecules and interaction;Cellular commiunity	ko04810//Regulation of actin cytoskeleton;ko04510//Focal adhesion;ko04512//ECM-receptor interaction	K06589	GO:0005623//cell;GO:0032991//macromolecular complex;GO:0005886//plasma membrane;GO:0071944//cell periphery;GO:0016020//membrane;GO:0005575//cellular_component;GO:0044464//cell part;GO:0043234//protein complex	GO:0003674//molecular_function	GO:0009987//cellular process;GO:0065007//biological regulation;GO:0051716//cellular response to stimulus;GO:0023052//signaling;GO:0044763//single-organism cellular process;GO:0008150//biological_process;GO:0050896//response to stimulus;GO:0007165//signal transduction;GO:0044700//single organism signaling;GO:0007154//cell communication;GO:0044699//single-organism process;GO:0050794//regulation of …
ENSDARG00000002506	265.5	347.5	24.26	31.7	0.38590329	0.04595912	0.145597447	no	zgc:92818	UPF0547 protein C16orf87 homolog [Danio rerio]	-	-	-	-	-	-	-
ENSDARG00000002507	56.53	33.505	1.33	0.735	-0.855610091	0.024386024	0.090613331	no	itga10	integrin, alpha 10 [Source:ZFIN;Acc:ZDB-GENE-100922-54]	Cellular Processes;Environmental Information Processing	Cellular commiunity;Signaling molecules and interaction;Cell motility	ko04810//Regulation of actin cytoskeleton;ko04510//Focal adhesion;ko04512//ECM-receptor interaction	K06586	GO:0005886//plasma membrane;GO:0032991//macromolecular complex;GO:0071944//cell periphery;GO:0005623//cell;GO:0016020//membrane;GO:0005575//cellular_component;GO:0044464//cell part;GO:0043234//protein complex	-	GO:0065007//biological regulation;GO:0050896//response to stimulus;GO:0051716//cellular response to stimulus;GO:0023052//signaling;GO:0050794//regulation of cellular process;GO:0007165//signal transduction;GO:0050789//regulation of biological process;GO:0044763//single-organism cellular process;GO:0009987//cellular process;GO:0022610//biological adhesion;GO:0007154//cell communication;GO:0007155/…
ENSDARG00000002508	1	0.5	0.055	0.065	0.2410081	1	1	no	ankrd33ab	PREDICTED: ankyrin repeat domain-containing protein 33B [Danio rerio]	-	-	-	-	-	-	-
ENSDARG00000002509	13.5	16.5	0.925	1.135	0.295167027	0.653658158	0.855454005	no	zgc:153911	zgc:153911 [Source:ZFIN;Acc:ZDB-GENE-061013-174]	-	-	-	-	GO:0005575//cellular_component	GO:0003674//molecular_function	GO:0008150//biological_process
ENSDARG00000002510	30	37.5	2.43	2.995	0.301599689	0.372705225	0.620184306	no	dmbx1b	diencephalon/mesencephalon homeobox 1b [Source:ZFIN;Acc:ZDB-GENE-050417-97]	-	-	-	-	GO:0005623//cell;GO:0043231//intracellular membrane-bounded organelle;GO:0005622//intracellular;GO:0043227//membrane-bounded organelle;GO:0043226//organelle;GO:0044424//intracellular part;GO:0044464//cell part;GO:0005634//nucleus;GO:0005575//cellular_component;GO:0043229//intracellular organelle	GO:0003676//nucleic acid binding;GO:0097159//organic cyclic compound binding;GO:0003674//molecular_function;GO:1901363//heterocyclic compound binding;GO:0005488//binding;GO:0003677//DNA binding	GO:0009058//biosynthetic process;GO:0008152//metabolic process;GO:0048869//cellular developmental process;GO:0044699//single-organism process;GO:0034641//cellular nitrogen compound metabolic process;GO:0044763//single-organism cellular process;GO:0032502//developmental process;GO:0048856//anatomical structure development;GO:0008150//biological_process;GO:0044767//single-organism developmental pro…
ENSDARG00000002523	805.46	709.95	78.31	67.51	-0.214095329	0.276905998	0.513962799	no	hsdl2	hydroxysteroid dehydrogenase like 2 [Source:ZFIN;Acc:ZDB-GENE-030131-1066]	-	-	-	-	GO:0005623//cell;GO:0043227//membrane-bounded organelle;GO:0043226//organelle;GO:0042579//microbody;GO:0005777//peroxisome;GO:0005622//intracellular;GO:0044464//cell part;GO:0044424//intracellular part;GO:0043229//intracellular organelle;GO:0044444//cytoplasmic part;GO:0005737//cytoplasm;GO:0005575//cellular_component;GO:0043231//intracellular membrane-bounded organelle	GO:0016491//oxidoreductase activity;GO:0003824//catalytic activity;GO:0003674//molecular_function	GO:0008150//biological_process
ENSDARG00000002533	11	28.5	0.975	2.535	1.378511623	0.004491749	0.023829638	yes	adora2b	adenosine A2b receptor [Source:ZFIN;Acc:ZDB-GENE-060511-1]	Organismal Systems;Environmental Information Processing	Signaling molecules and interaction;Signal transduction;Circulatory system	ko04080//Neuroactive ligand-receptor interaction;ko04020//Calcium signaling pathway;ko04270//Vascular smooth muscle contraction	K04267	GO:0071944//cell periphery;GO:0005575//cellular_component;GO:0016020//membrane;GO:0044464//cell part;GO:0005886//plasma membrane;GO:0005623//cell	GO:0004871//signal transducer activity;GO:0003674//molecular_function	GO:0009653//anatomical structure morphogenesis;GO:0008150//biological_process;GO:0007165//signal transduction;GO:0044763//single-organism cellular process;GO:0048869//cellular developmental process;GO:0032989//cellular component morphogenesis;GO:0051716//cellular response to stimulus;GO:0050789//regulation of biological process;GO:0044700//single organism signaling;GO:0007155//cell adhesion;GO:00…
ENSDARG00000002536	705.5	952	33.03	44.225	0.421085173	0.020853993	0.080109343	no	tm9sf4	transmembrane 9 superfamily protein member 4 [Source:ZFIN;Acc:ZDB-GENE-040426-1575]	-	-	-	-	GO:0005575//cellular_component	-	-
ENSDARG00000002538	599	560	35.79	33.1	-0.112725327	0.547355914	0.77144235	no	smu1a	WD40 repeat-containing protein SMU1 [Danio rerio]	-	-	-	-	GO:0005622//intracellular;GO:0043231//intracellular membrane-bounded organelle;GO:0043227//membrane-bounded organelle;GO:0005623//cell;GO:0043226//organelle;GO:0043229//intracellular organelle;GO:0044424//intracellular part;GO:0044464//cell part	-	-
ENSDARG00000002546	226.5	107	9.965	4.655	-1.098088637	1.54E-07	3.05E-06	yes	rundc3ab	PREDICTED: RUN domain-containing protein 3A isoform X1 [Danio rerio]	-	-	-	-	-	-	-
ENSDARG00000002549	107.5	121.5	8.31	9.21	0.148352679	0.508435405	0.747833656	no	eif3eb	eukaryotic translation initiation factor 3, subunit E, b [Source:ZFIN;Acc:ZDB-GENE-050208-283]	Genetic Information Processing	Translation	ko03013//RNA transport	K03250	GO:0043227//membrane-bounded organelle;GO:0043234//protein complex;GO:0043231//intracellular membrane-bounded organelle;GO:0032991//macromolecular complex;GO:0044424//intracellular part;GO:0005737//cytoplasm;GO:0005622//intracellular;GO:0005623//cell;GO:0044464//cell part;GO:0005575//cellular_component;GO:0043229//intracellular organelle;GO:0043226//organelle;GO:0005634//nucleus	GO:0003723//RNA binding;GO:0005488//binding;GO:0003674//molecular_function;GO:0097159//organic cyclic compound binding;GO:0003676//nucleic acid binding;GO:1901363//heterocyclic compound binding;GO:0008135//translation factor activity, RNA binding	GO:0044238//primary metabolic process;GO:0044260//cellular macromolecule metabolic process;GO:0016043//cellular component organization;GO:0044237//cellular metabolic process;GO:0010467//gene expression;GO:0071826//ribonucleoprotein complex subunit organization;GO:1901576//organic substance biosynthetic process;GO:0044267//cellular protein metabolic process;GO:0008150//biological_process;GO:003464…
ENSDARG00000002552	651.5	901.5	22.75	31.23	0.457066024	0.008770835	0.040912136	no	mapkapk2a	mitogen-activated protein kinase-activated protein kinase 2a [Source:ZFIN;Acc:ZDB-GENE-030131-5532]	Environmental Information Processing	Signal transduction	ko04010//MAPK signaling pathway;ko04370//VEGF signaling pathway	K04443	GO:0044464//cell part;GO:0043229//intracellular organelle;GO:0005575//cellular_component;GO:0005634//nucleus;GO:0043227//membrane-bounded organelle;GO:0044424//intracellular part;GO:0005623//cell;GO:0043226//organelle;GO:0043231//intracellular membrane-bounded organelle;GO:0005622//intracellular;GO:0005737//cytoplasm	GO:0016740//transferase activity;GO:0003674//molecular_function;GO:0019899//enzyme binding;GO:0003824//catalytic activity;GO:0004871//signal transducer activity;GO:0005488//binding;GO:0043167//ion binding;GO:0005515//protein binding;GO:0016772//transferase activity, transferring phosphorus-containing groups;GO:0016301//kinase activity	GO:0006950//response to stress;GO:0036211//protein modification process;GO:0044707//single-multicellular organism process;GO:0007165//signal transduction;GO:0043170//macromolecule metabolic process;GO:0007275//multicellular organism development;GO:0050896//response to stimulus;GO:0048856//anatomical structure development;GO:0007154//cell communication;GO:0044763//single-organism cellular process;…
ENSDARG00000002564	115	107	9.725	8.975	-0.115786311	0.622233948	0.834970345	no	syngr1a	synaptogyrin 1a [Source:ZFIN;Acc:ZDB-GENE-041010-169]	-	-	-	-	GO:0005737//cytoplasm;GO:0005623//cell;GO:0005575//cellular_component;GO:0031410//cytoplasmic vesicle;GO:0043226//organelle;GO:0031982//vesicle;GO:0043229//intracellular organelle;GO:0044444//cytoplasmic part;GO:0044464//cell part;GO:0005622//intracellular;GO:0044424//intracellular part	GO:0003674//molecular_function	GO:0008150//biological_process
ENSDARG00000002571	190	183	14.855	14.22	-0.06302714	0.765026771	0.9355482	no	tmod2	tropomodulin 2 [Source:ZFIN;Acc:ZDB-GENE-040912-185]	-	-	-	-	GO:0005737//cytoplasm;GO:0043229//intracellular organelle;GO:0043226//organelle;GO:0044424//intracellular part;GO:0005622//intracellular;GO:0005623//cell;GO:0043232//intracellular non-membrane-bounded organelle;GO:0044464//cell part;GO:0005575//cellular_component;GO:0043228//non-membrane-bounded organelle;GO:0005856//cytoskeleton	GO:0008092//cytoskeletal protein binding;GO:0005515//protein binding;GO:0003674//molecular_function;GO:0005488//binding	GO:0070271//protein complex biogenesis;GO:0008150//biological_process;GO:0065003//macromolecular complex assembly;GO:0007010//cytoskeleton organization;GO:0022607//cellular component assembly;GO:0044763//single-organism cellular process;GO:0044699//single-organism process;GO:0030154//cell differentiation;GO:0042592//homeostatic process;GO:0048646//anatomical structure formation involved in morpho…
ENSDARG00000002576	0	2.5	0.001	0.195	7.607330314	0.079115693	0.216546531	no	cabp5a	calcium binding protein 5a [Source:ZFIN;Acc:ZDB-GENE-040426-1655]	-	-	-	-	-	GO:0003674//molecular_function;GO:0043167//ion binding;GO:0005488//binding	-
ENSDARG00000002582	231.5	156	7.95	5.37	-0.566032772	0.014292298	0.060149812	no	tbx15	T-box 15 [Source:ZFIN;Acc:ZDB-GENE-020529-1]	-	-	-	-	GO:0005575//cellular_component;GO:0044424//intracellular part;GO:0005622//intracellular;GO:0005634//nucleus;GO:0044464//cell part;GO:0043226//organelle;GO:0043231//intracellular membrane-bounded organelle;GO:0043229//intracellular organelle;GO:0043227//membrane-bounded organelle;GO:0005623//cell	GO:0003700//transcription factor activity, sequence-specific DNA binding;GO:1901363//heterocyclic compound binding;GO:0003676//nucleic acid binding;GO:0001071//nucleic acid binding transcription factor activity;GO:0005488//binding;GO:0003674//molecular_function;GO:0003677//DNA binding;GO:0097159//organic cyclic compound binding	GO:0034641//cellular nitrogen compound metabolic process;GO:0009058//biosynthetic process;GO:0008152//metabolic process;GO:0006807//nitrogen compound metabolic process;GO:0009987//cellular process;GO:0044237//cellular metabolic process;GO:0008150//biological_process
ENSDARG00000002587	2267.5	728.5	52.525	16.64	-1.658348823	1.77E-20	2.64E-18	yes	dpysl3	dihydropyrimidinase-like 3 [Source:ZFIN;Acc:ZDB-GENE-050720-2]	-	-	-	-	GO:0044424//intracellular part;GO:0044464//cell part;GO:0005737//cytoplasm;GO:0005575//cellular_component;GO:0005622//intracellular;GO:0005623//cell	GO:0003674//molecular_function;GO:0016810//hydrolase activity, acting on carbon-nitrogen (but not peptide) bonds;GO:0003824//catalytic activity;GO:0016787//hydrolase activity	GO:0044767//single-organism developmental process;GO:0071840//cellular component organization or biogenesis;GO:0032502//developmental process;GO:0008150//biological_process;GO:0009987//cellular process;GO:0007010//cytoskeleton organization;GO:0051179//localization;GO:0044085//cellular component biogenesis;GO:0016043//cellular component organization;GO:0048869//cellular developmental process;GO:00…
ENSDARG00000002589	5945.5	3862.5	864.33	557.395	-0.632882175	0.000521238	0.004081844	no	mylpfb	myosin light chain, phosphorylatable, fast skeletal muscle b [Source:ZFIN;Acc:ZDB-GENE-040912-115]	Cellular Processes	Cell motility;Cellular commiunity	ko04810//Regulation of actin cytoskeleton;ko04510//Focal adhesion;ko04530//Tight junction	K12758	GO:0005575//cellular_component	GO:0003674//molecular_function;GO:0005488//binding;GO:0043167//ion binding	-
ENSDARG00000002591	958.5	1110.5	62.315	71.48	0.197960155	0.274418797	0.51099308	no	ruvbl1	RuvB-like AAA ATPase 1 [Source:ZFIN;Acc:ZDB-GENE-030109-2]	Environmental Information Processing	Signal transduction	ko04310//Wnt signaling pathway	K04499	GO:0032991//macromolecular complex;GO:0070013//intracellular organelle lumen;GO:0044446//intracellular organelle part;GO:0031974//membrane-enclosed lumen;GO:0044422//organelle part;GO:0044424//intracellular part;GO:0005654//nucleoplasm;GO:0000228//nuclear chromosome;GO:0005634//nucleus;GO:0005694//chromosome;GO:0005623//cell;GO:0043231//intracellular membrane-bounded organelle;GO:0043226//organel…	GO:0016818//hydrolase activity, acting on acid anhydrides, in phosphorus-containing anhydrides;GO:0043167//ion binding;GO:0016462//pyrophosphatase activity;GO:0016787//hydrolase activity;GO:0017111//nucleoside-triphosphatase activity;GO:0005488//binding;GO:0016887//ATPase activity;GO:0003674//molecular_function;GO:0016817//hydrolase activity, acting on acid anhydrides;GO:0003824//catalytic activi…	GO:0006950//response to stress;GO:0046483//heterocycle metabolic process;GO:0006139//nucleobase-containing compound metabolic process;GO:0006725//cellular aromatic compound metabolic process;GO:0006996//organelle organization;GO:0051276//chromosome organization;GO:0044260//cellular macromolecule metabolic process;GO:0034641//cellular nitrogen compound metabolic process;GO:0009987//cellular proces…
ENSDARG00000002593	148	122.5	9.795	8.085	-0.276797719	0.230080302	0.4567961	no	slc45a2	solute carrier family 45, member 2 [Source:ZFIN;Acc:ZDB-GENE-050208-97]	-	-	-	-	GO:0005575//cellular_component	GO:0003674//molecular_function	GO:0032502//developmental process;GO:0044767//single-organism developmental process;GO:0048869//cellular developmental process;GO:0008150//biological_process;GO:0043473//pigmentation;GO:0030154//cell differentiation;GO:0044763//single-organism cellular process;GO:0044699//single-organism process;GO:0009987//cellular process
ENSDARG00000002597	0.5	0.5	0.1	0.03	-1.736965594	1	1	no	pabpc1l	poly(A) binding protein, cytoplasmic 1-like [Source:ZFIN;Acc:ZDB-GENE-030131-5836]	-	-	-	-	GO:0005622//intracellular;GO:0005623//cell;GO:0005737//cytoplasm;GO:0044464//cell part;GO:0044424//intracellular part;GO:0005575//cellular_component	GO:0003723//RNA binding;GO:0097159//organic cyclic compound binding;GO:0003674//molecular_function;GO:0005488//binding;GO:0003676//nucleic acid binding;GO:1901363//heterocyclic compound binding	-
ENSDARG00000002600	24.5	28.5	1.235	1.42	0.201379888	0.606744337	0.823337499	no	pcsk1	proprotein convertase subtilisin/kexin type 1 [Source:ZFIN;Acc:ZDB-GENE-071009-1]	-	-	-	-	-	GO:0016787//hydrolase activity;GO:0003674//molecular_function;GO:0003824//catalytic activity;GO:0008233//peptidase activity	GO:0008150//biological_process
ENSDARG00000002601	73.5	83.5	7.16	8.07	0.172609086	0.52722692	0.753647806	no	irx7	iroquois homeobox 7 [Source:ZFIN;Acc:ZDB-GENE-020103-1]	-	-	-	-	GO:0043227//membrane-bounded organelle;GO:0044464//cell part;GO:0043226//organelle;GO:0043229//intracellular organelle;GO:0043231//intracellular membrane-bounded organelle;GO:0005622//intracellular;GO:0005634//nucleus;GO:0044424//intracellular part;GO:0005575//cellular_component;GO:0005623//cell	GO:1901363//heterocyclic compound binding;GO:0003677//DNA binding;GO:0005488//binding;GO:0097159//organic cyclic compound binding;GO:0003676//nucleic acid binding;GO:0003674//molecular_function	GO:0034641//cellular nitrogen compound metabolic process;GO:0009653//anatomical structure morphogenesis;GO:0044707//single-multicellular organism process;GO:0044237//cellular metabolic process;GO:0044699//single-organism process;GO:0009790//embryo development;GO:0007275//multicellular organism development;GO:0044767//single-organism developmental process;GO:0032501//multicellular organismal proce…
ENSDARG00000002607	180	58.5	4.645	1.495	-1.635533112	9.36E-10	2.93E-08	yes	unm_sa1614	un-named sa1614 [Source:ZFIN;Acc:ZDB-GENE-120411-1]	Cellular Processes	Transport and catabolism	ko04144//Endocytosis	K12488	-	GO:0003674//molecular_function;GO:0005488//binding;GO:0043167//ion binding;GO:0098772//molecular function regulator;GO:0030234//enzyme regulator activity	GO:0008150//biological_process
ENSDARG00000002609	180.5	103.5	4.12	2.27	-0.85995204	0.004388072	0.023387759	no	rnf145a	ring finger protein 145a [Source:ZFIN;Acc:ZDB-GENE-111012-3]	-	-	-	-	GO:0005575//cellular_component	GO:0043167//ion binding;GO:0003674//molecular_function;GO:0005488//binding	GO:0036211//protein modification process;GO:0008150//biological_process;GO:0009056//catabolic process;GO:0006464//cellular protein modification process;GO:0008152//metabolic process;GO:0044238//primary metabolic process;GO:0044267//cellular protein metabolic process;GO:0043170//macromolecule metabolic process;GO:0019538//protein metabolic process;GO:0009987//cellular process;GO:0071704//organic s…
ENSDARG00000002613	83.5	93	14.97	16.495	0.139954557	0.655391651	0.856815078	no	rpa3	replication protein A3 [Source:ZFIN;Acc:ZDB-GENE-040426-977]	-	-	-	-	GO:0043227//membrane-bounded organelle;GO:0043231//intracellular membrane-bounded organelle;GO:0005623//cell;GO:0005634//nucleus;GO:0005622//intracellular;GO:0044464//cell part;GO:0043229//intracellular organelle;GO:0044424//intracellular part;GO:0005575//cellular_component;GO:0043226//organelle	GO:0005488//binding;GO:1901363//heterocyclic compound binding;GO:0003677//DNA binding;GO:0097159//organic cyclic compound binding;GO:0003674//molecular_function;GO:0003676//nucleic acid binding	GO:0050896//response to stimulus;GO:0006950//response to stress;GO:0034641//cellular nitrogen compound metabolic process;GO:1901360//organic cyclic compound metabolic process;GO:0006725//cellular aromatic compound metabolic process;GO:0044237//cellular metabolic process;GO:0044260//cellular macromolecule metabolic process;GO:0044238//primary metabolic process;GO:0008150//biological_process;GO:000…
ENSDARG00000002632	880	1028.5	35.87	41.66	0.215885094	0.217820278	0.439460989	no	anxa11b	annexin A11b [Source:ZFIN;Acc:ZDB-GENE-030707-5]	-	-	-	-	-	GO:0043167//ion binding;GO:0005488//binding;GO:0008289//lipid binding;GO:0003674//molecular_function	-
ENSDARG00000002634	78.5	119.5	8.845	13.34	0.592824618	0.017331266	0.069455911	no	b4galt1	UDP-Gal:betaGlcNAc beta 1,4- galactosyltransferase, polypeptide 1 [Source:ZFIN;Acc:ZDB-GENE-050417-236]	-	-	-	-	GO:0005575//cellular_component	GO:0003824//catalytic activity;GO:0003674//molecular_function;GO:0016740//transferase activity;GO:0016757//transferase activity, transferring glycosyl groups	GO:0008152//metabolic process;GO:0044707//single-multicellular organism process;GO:0008150//biological_process;GO:0009790//embryo development;GO:0040011//locomotion;GO:0005975//carbohydrate metabolic process;GO:0006928//movement of cell or subcellular component;GO:0032501//multicellular organismal process;GO:0044238//primary metabolic process;GO:0044699//single-organism process;GO:0071704//organi…
ENSDARG00000002635	59.5	37.5	1.81	1.135	-0.6732974	0.066685536	0.190895825	no	zgc:85722	zgc:85722 [Source:ZFIN;Acc:ZDB-GENE-040516-7]	-	-	-	-	GO:0005575//cellular_component	GO:0003674//molecular_function	GO:0008150//biological_process
ENSDARG00000002642	306	430	19.815	27.685	0.482511555	0.009675664	0.044286477	no	sh3gl1b	SH3-domain GRB2-like 1b [Source:ZFIN;Acc:ZDB-GENE-031001-6]	Cellular Processes	Transport and catabolism	ko04144//Endocytosis	K11247	GO:0005737//cytoplasm;GO:0005623//cell;GO:0044464//cell part;GO:0044424//intracellular part;GO:0005622//intracellular;GO:0005575//cellular_component	-	GO:0051234//establishment of localization;GO:0051179//localization;GO:0016192//vesicle-mediated transport;GO:0008150//biological_process;GO:0006810//transport
ENSDARG00000002644	31	33.5	1.145	1.225	0.097434151	0.847945333	0.990664023	no	rgs5a	regulator of G protein signaling 5a [Source:ZFIN;Acc:ZDB-GENE-030131-7570]	-	-	-	-	GO:0044464//cell part;GO:0071944//cell periphery;GO:0005737//cytoplasm;GO:0005575//cellular_component;GO:0005622//intracellular;GO:0005623//cell;GO:0044424//intracellular part;GO:0016020//membrane;GO:0005886//plasma membrane	GO:0098772//molecular function regulator;GO:0003674//molecular_function;GO:0030234//enzyme regulator activity	GO:0008150//biological_process
ENSDARG00000002656	110.5	70	2.38	1.6	-0.572889668	0.011653029	0.051241617	no	stxbp5a	syntaxin binding protein 5a (tomosyn) [Source:ZFIN;Acc:ZDB-GENE-041001-161]	-	-	-	-	GO:0005575//cellular_component	-	GO:0051179//localization;GO:0016192//vesicle-mediated transport;GO:0006810//transport;GO:0051234//establishment of localization;GO:0008150//biological_process
ENSDARG00000002659	2282.5	1957.5	116.38	97.725	-0.252043567	0.19138311	0.402021922	no	mapre1b	microtubule-associated protein, RP/EB family, member 1b [Source:ZFIN;Acc:ZDB-GENE-040426-2256]	-	-	-	-	GO:0043232//intracellular non-membrane-bounded organelle;GO:0043228//non-membrane-bounded organelle;GO:0005575//cellular_component;GO:0043229//intracellular organelle;GO:0016020//membrane;GO:0044464//cell part;GO:0071944//cell periphery;GO:0044424//intracellular part;GO:0005856//cytoskeleton;GO:0005622//intracellular;GO:0005623//cell;GO:0005886//plasma membrane;GO:0043226//organelle	GO:0005515//protein binding;GO:0005488//binding;GO:0003674//molecular_function;GO:0008092//cytoskeletal protein binding	GO:0016043//cellular component organization;GO:0006996//organelle organization;GO:0009987//cellular process;GO:0071840//cellular component organization or biogenesis;GO:0008150//biological_process;GO:0007010//cytoskeleton organization
ENSDARG00000002663	152.5	276	7.205	13	0.851441288	0.000124146	0.00119837	no	optn	optineurin [Source:ZFIN;Acc:ZDB-GENE-030131-8103]	-	-	-	-	GO:0005575//cellular_component;GO:0044444//cytoplasmic part;GO:0031982//vesicle;GO:0044464//cell part;GO:0043231//intracellular membrane-bounded organelle;GO:0005794//Golgi apparatus;GO:0012505//endomembrane system;GO:0043227//membrane-bounded organelle;GO:0043226//organelle;GO:0043229//intracellular organelle;GO:0005737//cytoplasm;GO:0005622//intracellular;GO:0005623//cell;GO:0044424//intracellu…	GO:0003674//molecular_function;GO:0032182//ubiquitin-like protein binding;GO:0005515//protein binding;GO:0005488//binding	GO:0051234//establishment of localization;GO:0009056//catabolic process;GO:0009987//cellular process;GO:0016192//vesicle-mediated transport;GO:0008150//biological_process;GO:0006810//transport;GO:0051179//localization;GO:0008152//metabolic process;GO:0006914//autophagy
ENSDARG00000002666	19.5	15.5	1.475	1.155	-0.352822103	0.500362439	0.740783973	no	kcnj1b	potassium inwardly-rectifying channel, subfamily J, member 1b [Source:ZFIN;Acc:ZDB-GENE-070620-9]	-	-	-	-	GO:0005575//cellular_component;GO:0005623//cell;GO:0071944//cell periphery;GO:0005886//plasma membrane;GO:0016020//membrane;GO:0044464//cell part	GO:0003674//molecular_function;GO:0005215//transporter activity;GO:0022857//transmembrane transporter activity	GO:0044699//single-organism process;GO:0006810//transport;GO:0044765//single-organism transport;GO:0055085//transmembrane transport;GO:0051234//establishment of localization;GO:0008150//biological_process;GO:0051179//localization;GO:1902578//single-organism localization;GO:0044763//single-organism cellular process;GO:0009987//cellular process
ENSDARG00000002670	198	147.5	8.855	6.39	-0.470676376	0.035936706	0.120922593	no	ATG14	beclin 1-associated autophagy-related key regulator [Danio rerio]	Cellular Processes	Transport and catabolism	ko04140//Regulation of autophagy	K17889	-	-	GO:0006914//autophagy;GO:0009987//cellular process
ENSDARG00000002682	158	95	6.975	4.095	-0.768329765	0.001028572	0.007186537	no	tbcela	tubulin folding cofactor E-like a [Source:ZFIN;Acc:ZDB-GENE-040426-1719]	-	-	-	-	-	-	GO:0008150//biological_process
ENSDARG00000002685	0	2	0.001	0.245	7.936637939	0.177921873	0.382614625	no	fam113	family with sequence similarity 113 [Source:ZFIN;Acc:ZDB-GENE-041212-23]	-	-	-	-	GO:0005575//cellular_component	GO:0003674//molecular_function	-
ENSDARG00000002690	80	72.5	8.83	8.17	-0.11207736	0.595690943	0.814500249	no	rabif	RAB interacting factor [Source:ZFIN;Acc:ZDB-GENE-040718-216]	-	-	-	-	GO:0044424//intracellular part;GO:0005737//cytoplasm;GO:0005575//cellular_component;GO:0005829//cytosol;GO:0005622//intracellular;GO:0044444//cytoplasmic part;GO:0044464//cell part;GO:0005623//cell	GO:0043167//ion binding;GO:0005488//binding;GO:0003674//molecular_function;GO:0005515//protein binding;GO:0019899//enzyme binding	GO:0065007//biological regulation;GO:0050896//response to stimulus;GO:0050794//regulation of cellular process;GO:0007154//cell communication;GO:0050789//regulation of biological process;GO:0008150//biological_process;GO:0016192//vesicle-mediated transport;GO:0007165//signal transduction;GO:0006810//transport;GO:0023052//signaling;GO:0044699//single-organism process;GO:0051234//establishment of lo…
ENSDARG00000002696	6.5	11.5	0.43	0.65	0.596103058	0.214581206	0.434636809	no	gnb3b	guanine nucleotide binding protein (G protein), beta polypeptide 3b [Source:ZFIN;Acc:ZDB-GENE-040426-2280]	-	-	-	-	-	-	GO:0050896//response to stimulus;GO:0044699//single-organism process;GO:0008150//biological_process;GO:0009987//cellular process;GO:0007165//signal transduction;GO:0065007//biological regulation;GO:0044763//single-organism cellular process;GO:0050794//regulation of cellular process;GO:0051716//cellular response to stimulus;GO:0044700//single organism signaling;GO:0023052//signaling;GO:0050789//re…
ENSDARG00000002701	3.5	7.5	0.275	0.53	0.946560741	0.213582032	0.433608187	no	rasl12	RAS-like, family 12 [Source:ZFIN;Acc:ZDB-GENE-040426-1201]	-	-	-	-	GO:0005575//cellular_component	GO:0017111//nucleoside-triphosphatase activity;GO:0016817//hydrolase activity, acting on acid anhydrides;GO:0005488//binding;GO:0003924//GTPase activity;GO:0003674//molecular_function;GO:0043167//ion binding;GO:0016818//hydrolase activity, acting on acid anhydrides, in phosphorus-containing anhydrides;GO:0016462//pyrophosphatase activity;GO:0003824//catalytic activity;GO:0016787//hydrolase activi…	GO:0008150//biological_process;GO:0007165//signal transduction;GO:0050896//response to stimulus;GO:0065007//biological regulation;GO:0044763//single-organism cellular process;GO:0023052//signaling;GO:0009987//cellular process;GO:0051716//cellular response to stimulus;GO:0044699//single-organism process;GO:0050794//regulation of cellular process;GO:0044700//single organism signaling;GO:0007154//ce…
ENSDARG00000002707	6.5	9	0.645	0.875	0.439983856	0.553542261	0.777397939	no	her11	hairy-related 11 [Source:ZFIN;Acc:ZDB-GENE-040824-4]	-	-	-	-	GO:0043227//membrane-bounded organelle;GO:0043231//intracellular membrane-bounded organelle;GO:0044464//cell part;GO:0005634//nucleus;GO:0044424//intracellular part;GO:0043229//intracellular organelle;GO:0005623//cell;GO:0043226//organelle;GO:0005622//intracellular;GO:0005575//cellular_component	GO:0003674//molecular_function;GO:0097159//organic cyclic compound binding;GO:0003676//nucleic acid binding;GO:0003677//DNA binding;GO:1901363//heterocyclic compound binding;GO:0005488//binding	GO:0007165//signal transduction;GO:0051716//cellular response to stimulus;GO:0044763//single-organism cellular process;GO:0048869//cellular developmental process;GO:0065007//biological regulation;GO:0048856//anatomical structure development;GO:0032501//multicellular organismal process;GO:0044237//cellular metabolic process;GO:0007154//cell communication;GO:0007275//multicellular organism developm…
ENSDARG00000002710	5784.5	10939	214.955	406.84	0.920426861	2.72E-05	0.000319541	no	ncl	nucleolin [Source:ZFIN;Acc:ZDB-GENE-030131-6986]	-	-	-	-	-	GO:0003723//RNA binding;GO:0097159//organic cyclic compound binding;GO:1901363//heterocyclic compound binding;GO:0003676//nucleic acid binding;GO:0003674//molecular_function;GO:0005488//binding	GO:0032501//multicellular organismal process;GO:0071840//cellular component organization or biogenesis;GO:0008150//biological_process;GO:0042254//ribosome biogenesis;GO:0048856//anatomical structure development;GO:0034641//cellular nitrogen compound metabolic process;GO:0006807//nitrogen compound metabolic process;GO:0009987//cellular process;GO:0032502//developmental process;GO:0007275//multicel…
ENSDARG00000002720	175.5	334.5	10.635	20.165	0.923033372	1.04E-06	1.74E-05	no	utp15	utp15, U3 small nucleolar ribonucleoprotein, homolog [Source:ZFIN;Acc:ZDB-GENE-030131-3831]	Genetic Information Processing	Translation	ko03008//Ribosome biogenesis in eukaryotes	K14549	GO:0005623//cell;GO:0005622//intracellular;GO:0043233//organelle lumen;GO:0044424//intracellular part;GO:0031974//membrane-enclosed lumen;GO:0070013//intracellular organelle lumen;GO:0043226//organelle;GO:0044428//nuclear part;GO:0043229//intracellular organelle;GO:0043228//non-membrane-bounded organelle;GO:0043232//intracellular non-membrane-bounded organelle;GO:0043227//membrane-bounded organel…	-	GO:0008150//biological_process;GO:0044085//cellular component biogenesis;GO:0034641//cellular nitrogen compound metabolic process;GO:0042254//ribosome biogenesis;GO:0048856//anatomical structure development;GO:0048646//anatomical structure formation involved in morphogenesis;GO:0008152//metabolic process;GO:0032502//developmental process;GO:0006807//nitrogen compound metabolic process;GO:0009653/…
ENSDARG00000002722	0.5	0	0.065	0.001	-6.022367813	1	1	no	ankrd2	ankyrin repeat domain 2 (stretch responsive muscle) [Source:ZFIN;Acc:ZDB-GENE-090313-383]	-	-	-	-	GO:0005737//cytoplasm;GO:0043231//intracellular membrane-bounded organelle;GO:0044424//intracellular part;GO:0005623//cell;GO:0043229//intracellular organelle;GO:0043226//organelle;GO:0005634//nucleus;GO:0005622//intracellular;GO:0043227//membrane-bounded organelle;GO:0044464//cell part;GO:0005575//cellular_component	GO:0000988//transcription factor activity, protein binding;GO:0008134//transcription factor binding;GO:0008092//cytoskeletal protein binding;GO:0005515//protein binding;GO:0003674//molecular_function;GO:0005488//binding	GO:0009058//biosynthetic process;GO:0032502//developmental process;GO:0030154//cell differentiation;GO:0034641//cellular nitrogen compound metabolic process;GO:0044699//single-organism process;GO:0044237//cellular metabolic process;GO:0009987//cellular process;GO:0008152//metabolic process;GO:0006807//nitrogen compound metabolic process;GO:0048869//cellular developmental process;GO:0008150//biolo…
ENSDARG00000002728	0	0	0.001	0.001	0	1	1	notest	kiss1ra	KISS1 receptor a [Source:ZFIN;Acc:ZDB-GENE-070912-521]	Environmental Information Processing	Signaling molecules and interaction	ko04080//Neuroactive ligand-receptor interaction	K08374	GO:0044464//cell part;GO:0005737//cytoplasm;GO:0016020//membrane;GO:0005623//cell;GO:0005575//cellular_component;GO:0044424//intracellular part;GO:0005886//plasma membrane;GO:0005622//intracellular;GO:0071944//cell periphery	GO:0004871//signal transducer activity;GO:0003674//molecular_function	GO:0007165//signal transduction;GO:0008150//biological_process;GO:0044699//single-organism process;GO:0044700//single organism signaling;GO:0044763//single-organism cellular process;GO:0065007//biological regulation;GO:0051716//cellular response to stimulus;GO:0050896//response to stimulus;GO:0007154//cell communication;GO:0050794//regulation of cellular process;GO:0050789//regulation of biologic…
ENSDARG00000002731	583	859.5	49.005	71.65	0.548037749	0.001717162	0.010914206	no	sdc2	syndecan 2 [Source:ZFIN;Acc:ZDB-GENE-021206-3]	-	-	-	-	GO:0005623//cell;GO:0005575//cellular_component	-	GO:0051179//localization;GO:0044767//single-organism developmental process;GO:0032501//multicellular organismal process;GO:0040011//locomotion;GO:0007275//multicellular organism development;GO:0044707//single-multicellular organism process;GO:0044763//single-organism cellular process;GO:0032989//cellular component morphogenesis;GO:0009790//embryo development;GO:0006928//movement of cell or subcel…
ENSDARG00000002732	21.5	11.5	1.52	0.8	-0.925999419	0.087497586	0.23263408	no	spon2b	spondin 2b, extracellular matrix protein [Source:ZFIN;Acc:ZDB-GENE-990415-161]	-	-	-	-	GO:0005578//proteinaceous extracellular matrix;GO:0031012//extracellular matrix;GO:0005576//extracellular region;GO:0044421//extracellular region part;GO:0005575//cellular_component	GO:0003674//molecular_function	-
ENSDARG00000002745	1262.5	1613	73.195	98.21	0.424124831	0.068181143	0.194072239	no	tdh	L-threonine dehydrogenase [Source:ZFIN;Acc:ZDB-GENE-040426-2379]	Metabolism	Amino acid metabolism	ko00260//Glycine, serine and threonine metabolism	K15789	-	GO:0003674//molecular_function	-
ENSDARG00000002748	105.5	97.5	3.615	3.31	-0.12716443	0.610605991	0.82632583	no	sema6d	sema domain, transmembrane domain (TM), and cytoplasmic domain, (semaphorin) 6D [Source:ZFIN;Acc:ZDB-GENE-040426-1933]	-	-	-	-	GO:0044464//cell part;GO:0005575//cellular_component;GO:0005886//plasma membrane;GO:0071944//cell periphery;GO:0016020//membrane;GO:0005623//cell	-	-
ENSDARG00000002750	302	175	7.985	4.575	-0.803520664	0.000682641	0.005117022	no	phf20a	PHD finger protein 20, a [Source:ZFIN;Acc:ZDB-GENE-070912-270]	-	-	-	-	GO:0005622//intracellular;GO:0031974//membrane-enclosed lumen;GO:0043226//organelle;GO:0044422//organelle part;GO:0005575//cellular_component;GO:0005654//nucleoplasm;GO:0043233//organelle lumen;GO:0043229//intracellular organelle;GO:0005634//nucleus;GO:0005623//cell;GO:0031981//nuclear lumen;GO:0044446//intracellular organelle part;GO:0043231//intracellular membrane-bounded organelle;GO:0043227//…	GO:0003674//molecular_function;GO:0043167//ion binding;GO:0005488//binding	GO:0009058//biosynthetic process;GO:0009987//cellular process;GO:0044237//cellular metabolic process;GO:0006807//nitrogen compound metabolic process;GO:0008150//biological_process;GO:0034641//cellular nitrogen compound metabolic process;GO:0008152//metabolic process
ENSDARG00000002754	28.5	81.5	2.84	8.06	1.504888909	1.23E-05	0.000159849	yes	pdcd2l	programmed cell death 2-like [Source:ZFIN;Acc:ZDB-GENE-040426-967]	-	-	-	-	GO:0005623//cell;GO:0005575//cellular_component;GO:0044424//intracellular part;GO:0044464//cell part;GO:0005622//intracellular;GO:0005737//cytoplasm	GO:0003674//molecular_function	GO:0008219//cell death;GO:0044763//single-organism cellular process;GO:0009987//cellular process;GO:0032502//developmental process;GO:0044699//single-organism process;GO:0048856//anatomical structure development;GO:0008150//biological_process;GO:0016265//death
ENSDARG00000002758	219.5	184.5	10.81	9.29	-0.218616021	0.272841118	0.51099308	no	dedd1	death effector domain-containing 1 [Source:ZFIN;Acc:ZDB-GENE-000616-2]	-	-	-	-	GO:0043231//intracellular membrane-bounded organelle;GO:0044422//organelle part;GO:0043233//organelle lumen;GO:0005622//intracellular;GO:0005575//cellular_component;GO:0044464//cell part;GO:0044428//nuclear part;GO:0043229//intracellular organelle;GO:0070013//intracellular organelle lumen;GO:0043232//intracellular non-membrane-bounded organelle;GO:0043227//membrane-bounded organelle;GO:0031981//n…	GO:1901363//heterocyclic compound binding;GO:0003677//DNA binding;GO:0005488//binding;GO:0003674//molecular_function;GO:0003676//nucleic acid binding;GO:0097159//organic cyclic compound binding	GO:0023052//signaling;GO:0051716//cellular response to stimulus;GO:0009987//cellular process;GO:0050794//regulation of cellular process;GO:0050789//regulation of biological process;GO:0007154//cell communication;GO:0016265//death;GO:0008150//biological_process;GO:0050896//response to stimulus;GO:0044699//single-organism process;GO:0065007//biological regulation;GO:0044700//single organism signali…
ENSDARG00000002760	4.5	0.5	0.275	0.03	-3.196397213	0.045842829	0.145365355	no	gdf5	growth differentiation factor 5 [Source:ZFIN;Acc:ZDB-GENE-990415-39]	Environmental Information Processing	Signaling molecules and interaction;Signal transduction	ko04060//Cytokine-cytokine receptor interaction;ko04350//TGF-beta signaling pathway	K04664	GO:0005575//cellular_component;GO:0044421//extracellular region part;GO:0005615//extracellular space;GO:0005576//extracellular region	GO:0003674//molecular_function	GO:0008152//metabolic process;GO:0016265//death;GO:0019538//protein metabolic process;GO:0030154//cell differentiation;GO:0032502//developmental process;GO:0009987//cellular process;GO:0071704//organic substance metabolic process;GO:0050789//regulation of biological process;GO:0043170//macromolecule metabolic process;GO:0044267//cellular protein metabolic process;GO:0044237//cellular metabolic pr…
ENSDARG00000002764	210.5	142.5	18.54	12.58	-0.559509322	0.027540783	0.099156326	no	miox	myo-inositol oxygenase [Source:ZFIN;Acc:ZDB-GENE-050913-113]	-	-	-	-	GO:0005623//cell;GO:0044424//intracellular part;GO:0005622//intracellular;GO:0005575//cellular_component;GO:0005737//cytoplasm;GO:0044464//cell part	GO:0003824//catalytic activity;GO:0005488//binding;GO:0016491//oxidoreductase activity;GO:0003674//molecular_function;GO:0043167//ion binding	GO:0005975//carbohydrate metabolic process;GO:0008150//biological_process;GO:0009056//catabolic process;GO:0044699//single-organism process;GO:0008152//metabolic process;GO:0044281//small molecule metabolic process;GO:0044710//single-organism metabolic process;GO:0044238//primary metabolic process;GO:0071704//organic substance metabolic process
ENSDARG00000002768	11383.5	8740.5	1847.21	1409.95	-0.389703886	0.031850073	0.110459481	no	pvalb2	parvalbumin 2 [Source:ZFIN;Acc:ZDB-GENE-000322-4]	-	-	-	-	-	GO:0005488//binding;GO:0043167//ion binding;GO:0003674//molecular_function	-
ENSDARG00000002771	9.825	10.49	0.2	0.2	0	1	1	no	si:ch211-48m9.1	si:ch211-48m9.1 [Source:ZFIN;Acc:ZDB-GENE-060531-64]	-	-	-	-	GO:0005575//cellular_component;GO:0016020//membrane;GO:0071944//cell periphery;GO:0044464//cell part;GO:0005623//cell;GO:0005886//plasma membrane	GO:0022857//transmembrane transporter activity;GO:0005215//transporter activity;GO:0003674//molecular_function	GO:0044699//single-organism process;GO:0042592//homeostatic process;GO:0065008//regulation of biological quality;GO:1902578//single-organism localization;GO:0044763//single-organism cellular process;GO:0006810//transport;GO:0051234//establishment of localization;GO:0008150//biological_process;GO:0044765//single-organism transport;GO:0009987//cellular process;GO:0065007//biological regulation;GO:0…
ENSDARG00000002779	17	26	1.76	2.66	0.595850817	0.139295059	0.32474346	no	pdx1	pancreatic and duodenal homeobox 1 [Source:ZFIN;Acc:ZDB-GENE-990415-122]	-	-	-	-	GO:0043226//organelle;GO:0043229//intracellular organelle;GO:0005622//intracellular;GO:0043227//membrane-bounded organelle;GO:0044424//intracellular part;GO:0043231//intracellular membrane-bounded organelle;GO:0044464//cell part;GO:0005623//cell;GO:0005575//cellular_component;GO:0005634//nucleus	GO:0005488//binding;GO:0003677//DNA binding;GO:0097159//organic cyclic compound binding;GO:0003700//transcription factor activity, sequence-specific DNA binding;GO:0001071//nucleic acid binding transcription factor activity;GO:1901363//heterocyclic compound binding;GO:0003676//nucleic acid binding;GO:0003674//molecular_function	GO:0065007//biological regulation;GO:0065008//regulation of biological quality;GO:0042592//homeostatic process;GO:0034641//cellular nitrogen compound metabolic process;GO:0048856//anatomical structure development;GO:0044237//cellular metabolic process;GO:0009987//cellular process;GO:0009058//biosynthetic process;GO:0032502//developmental process;GO:0008150//biological_process;GO:0006807//nitrogen…
ENSDARG00000002787	1006.5	738	40.66	29.865	-0.445154493	0.01986787	0.077213463	no	tle3a	transducin-like enhancer of split 3a [Source:ZFIN;Acc:ZDB-GENE-990415-86]	Environmental Information Processing	Signal transduction	ko04310//Wnt signaling pathway;ko04330//Notch signaling pathway	K04497	GO:0044464//cell part;GO:0043227//membrane-bounded organelle;GO:0005575//cellular_component;GO:0043226//organelle;GO:0043231//intracellular membrane-bounded organelle;GO:0005623//cell;GO:0044424//intracellular part;GO:0005634//nucleus;GO:0043229//intracellular organelle;GO:0005622//intracellular	-	GO:0008150//biological_process;GO:0034641//cellular nitrogen compound metabolic process;GO:0006807//nitrogen compound metabolic process;GO:0044237//cellular metabolic process;GO:0008152//metabolic process;GO:0009058//biosynthetic process;GO:0009987//cellular process
ENSDARG00000002790	2005.5	2345	110.285	125.915	0.191213577	0.217043054	0.438454636	no	ap2m1b	adaptor-related protein complex 2, mu 1 subunit, b [Source:ZFIN;Acc:ZDB-GENE-040426-1103]	Cellular Processes	Transport and catabolism	ko04144//Endocytosis	K11826	GO:0005886//plasma membrane;GO:0005737//cytoplasm;GO:0005623//cell;GO:0032991//macromolecular complex;GO:0005575//cellular_component;GO:0005622//intracellular;GO:0044464//cell part;GO:0043234//protein complex;GO:0071944//cell periphery;GO:0044424//intracellular part;GO:0016020//membrane	GO:0003674//molecular_function;GO:0008289//lipid binding;GO:0005488//binding	GO:0023052//signaling;GO:0009987//cellular process;GO:0044763//single-organism cellular process;GO:0050794//regulation of cellular process;GO:0044699//single-organism process;GO:0051179//localization;GO:0044700//single organism signaling;GO:0007267//cell-cell signaling;GO:0051716//cellular response to stimulus;GO:0007154//cell communication;GO:0065007//biological regulation;GO:0050896//response t…
ENSDARG00000002791	3274.14	5401.46	107.96	176.815	0.711743788	3.47E-05	0.000396769	no	atp1a1a.1	ATPase Na+/K+ transporting subunit alpha 1a, tandem duplicate 1 [Source:ZFIN;Acc:ZDB-GENE-001212-1]	Organismal Systems	Circulatory system	ko04261//Adrenergic signaling in cardiomyocytes;ko04260//Cardiac muscle contraction	K01539	GO:0071944//cell periphery;GO:0005623//cell;GO:0044464//cell part;GO:0005886//plasma membrane;GO:0005575//cellular_component;GO:0016020//membrane	GO:0016887//ATPase activity;GO:0016817//hydrolase activity, acting on acid anhydrides;GO:0016462//pyrophosphatase activity;GO:0016787//hydrolase activity;GO:0016818//hydrolase activity, acting on acid anhydrides, in phosphorus-containing anhydrides;GO:0017111//nucleoside-triphosphatase activity;GO:0005215//transporter activity;GO:0005488//binding;GO:0022857//transmembrane transporter activity;GO:…	GO:0071840//cellular component organization or biogenesis;GO:0043062//extracellular structure organization;GO:0051234//establishment of localization;GO:0048646//anatomical structure formation involved in morphogenesis;GO:0030154//cell differentiation;GO:0044767//single-organism developmental process;GO:0051179//localization;GO:0040011//locomotion;GO:1902578//single-organism localization;GO:004470…
ENSDARG00000002792	879	989.5	33.38	37.145	0.154184071	0.48290669	0.725815144	no	arcn1a	archain 1a [Source:ZFIN;Acc:ZDB-GENE-021031-2]	-	-	-	-	GO:0043226//organelle;GO:0031410//cytoplasmic vesicle;GO:0044444//cytoplasmic part;GO:0012505//endomembrane system;GO:0005794//Golgi apparatus;GO:0005575//cellular_component;GO:0043231//intracellular membrane-bounded organelle;GO:0005623//cell;GO:0031982//vesicle;GO:0043229//intracellular organelle;GO:0044464//cell part;GO:0043227//membrane-bounded organelle;GO:0043234//protein complex;GO:0005737…	-	GO:0016192//vesicle-mediated transport;GO:0008150//biological_process;GO:0051234//establishment of localization;GO:0051179//localization;GO:0006810//transport
ENSDARG00000002795	787	672.5	38.34	32.425	-0.241743763	0.182194532	0.388337532	no	meis3	myeloid ecotropic viral integration site 3 [Source:ZFIN;Acc:ZDB-GENE-010406-2]	-	-	-	-	GO:0005737//cytoplasm;GO:0043229//intracellular organelle;GO:0005634//nucleus;GO:0043231//intracellular membrane-bounded organelle;GO:0044424//intracellular part;GO:0043226//organelle;GO:0044464//cell part;GO:0005622//intracellular;GO:0043227//membrane-bounded organelle;GO:0005575//cellular_component;GO:0005623//cell	GO:0003674//molecular_function;GO:0003676//nucleic acid binding;GO:0003677//DNA binding;GO:0005488//binding;GO:1901363//heterocyclic compound binding;GO:0097159//organic cyclic compound binding	GO:0032502//developmental process;GO:0016043//cellular component organization;GO:0043412//macromolecule modification;GO:0044260//cellular macromolecule metabolic process;GO:0071704//organic substance metabolic process;GO:0040011//locomotion;GO:0048869//cellular developmental process;GO:0044763//single-organism cellular process;GO:0006807//nitrogen compound metabolic process;GO:0048870//cell motil…
ENSDARG00000002797	0	0	0.001	0.001	0	1	1	notest	BX908804.1	-	-	-	-	-	-	GO:0003674//molecular_function;GO:0016740//transferase activity;GO:0016757//transferase activity, transferring glycosyl groups;GO:0003824//catalytic activity	GO:0043170//macromolecule metabolic process;GO:0036211//protein modification process;GO:0006464//cellular protein modification process;GO:0009058//biosynthetic process;GO:0043412//macromolecule modification;GO:0008150//biological_process;GO:0044238//primary metabolic process;GO:0044260//cellular macromolecule metabolic process;GO:0008152//metabolic process;GO:0044267//cellular protein metabolic p…
ENSDARG00000002798	147.5	162.5	7.715	8.405	0.123581663	0.572693172	0.794128532	no	cog8	component of oligomeric golgi complex 8 [Source:ZFIN;Acc:ZDB-GENE-050320-74]	-	-	-	-	GO:0005737//cytoplasm;GO:0043231//intracellular membrane-bounded organelle;GO:0043229//intracellular organelle;GO:0032991//macromolecular complex;GO:0005575//cellular_component;GO:0005622//intracellular;GO:0005623//cell;GO:0043234//protein complex;GO:0005794//Golgi apparatus;GO:0044424//intracellular part;GO:0043227//membrane-bounded organelle;GO:0043226//organelle;GO:0044464//cell part;GO:001250…	-	GO:0006810//transport;GO:0051179//localization;GO:0051234//establishment of localization;GO:0016192//vesicle-mediated transport;GO:0008150//biological_process
ENSDARG00000002816	11	13	0.31	0.36	0.215728691	0.713573412	0.900259945	no	rasgrf2b	Ras protein-specific guanine nucleotide-releasing factor 2b [Source:ZFIN;Acc:ZDB-GENE-060504-1]	Environmental Information Processing	Signal transduction	ko04010//MAPK signaling pathway	K12326	GO:0043231//intracellular membrane-bounded organelle;GO:0005886//plasma membrane;GO:0043227//membrane-bounded organelle;GO:0044444//cytoplasmic part;GO:0005737//cytoplasm;GO:0016020//membrane;GO:0005623//cell;GO:0005575//cellular_component;GO:0044464//cell part;GO:0071944//cell periphery;GO:0044424//intracellular part;GO:0005783//endoplasmic reticulum;GO:0012505//endomembrane system;GO:0043229//i…	GO:0003674//molecular_function;GO:0019899//enzyme binding;GO:0005488//binding;GO:0005515//protein binding	GO:0044763//single-organism cellular process;GO:0009987//cellular process;GO:0007165//signal transduction;GO:0007154//cell communication;GO:0051716//cellular response to stimulus;GO:0023052//signaling;GO:0065007//biological regulation;GO:0008150//biological_process;GO:0050794//regulation of cellular process;GO:0050896//response to stimulus;GO:0044699//single-organism process;GO:0044700//single or…
ENSDARG00000002826	174	135.5	12.59	10.355	-0.281950729	0.07639799	0.211348671	no	cep57l1	centrosomal protein 57, like 1 [Source:ZFIN;Acc:ZDB-GENE-040808-27]	-	-	-	-	GO:0043226//organelle;GO:0043232//intracellular non-membrane-bounded organelle;GO:0044464//cell part;GO:0005623//cell;GO:0005856//cytoskeleton;GO:0015630//microtubule cytoskeleton;GO:0044430//cytoskeletal part;GO:0005622//intracellular;GO:0044446//intracellular organelle part;GO:0005815//microtubule organizing center;GO:0044424//intracellular part;GO:0005575//cellular_component;GO:0043229//intrac…	GO:0008092//cytoskeletal protein binding;GO:0003674//molecular_function;GO:0005515//protein binding;GO:0005488//binding	GO:0009987//cellular process;GO:0044763//single-organism cellular process;GO:0007059//chromosome segregation;GO:0008150//biological_process;GO:0044699//single-organism process;GO:0016043//cellular component organization;GO:0000278//mitotic cell cycle;GO:0006996//organelle organization;GO:0051276//chromosome organization;GO:0071840//cellular component organization or biogenesis;GO:0007049//cell cy…
ENSDARG00000002830	114.5	229.5	6.325	12.565	0.990273286	5.04E-06	7.16E-05	no	trmt2a	tRNA methyltransferase 2 homolog A [Source:ZFIN;Acc:ZDB-GENE-030131-6876]	-	-	-	-	GO:0005575//cellular_component	GO:0008168//methyltransferase activity;GO:1901363//heterocyclic compound binding;GO:0003723//RNA binding;GO:0003674//molecular_function;GO:0097159//organic cyclic compound binding;GO:0003676//nucleic acid binding;GO:0016741//transferase activity, transferring one-carbon groups;GO:0016740//transferase activity;GO:0003824//catalytic activity;GO:0005488//binding	GO:0008150//biological_process;GO:0044237//cellular metabolic process;GO:0034641//cellular nitrogen compound metabolic process;GO:0006807//nitrogen compound metabolic process;GO:0009987//cellular process;GO:0008152//metabolic process
ENSDARG00000002831	209.96	118.98	2.305	2.31	0.003126101	0.000148494	0.001400985	no	col4a4	collagen, type IV, alpha 4 [Source:ZFIN;Acc:ZDB-GENE-101001-1]	-	-	-	-	GO:0005575//cellular_component;GO:0031012//extracellular matrix;GO:0032991//macromolecular complex;GO:0043234//protein complex;GO:0005578//proteinaceous extracellular matrix;GO:0044421//extracellular region part;GO:0005576//extracellular region	GO:0005198//structural molecule activity;GO:0003674//molecular_function	-
ENSDARG00000002840	527	265	11.98	6.255	-0.937546119	3.71E-08	8.42E-07	no	si:dkey-28b4.8	si:dkey-28b4.8 [Source:ZFIN;Acc:ZDB-GENE-090501-2]	Environmental Information Processing	Signal transduction	ko04020//Calcium signaling pathway	K05853	GO:0005575//cellular_component	GO:0016818//hydrolase activity, acting on acid anhydrides, in phosphorus-containing anhydrides;GO:0003824//catalytic activity;GO:0022857//transmembrane transporter activity;GO:0016817//hydrolase activity, acting on acid anhydrides;GO:0043167//ion binding;GO:0016787//hydrolase activity;GO:0016887//ATPase activity;GO:0005488//binding;GO:0003674//molecular_function;GO:0017111//nucleoside-triphosphat…	GO:0009987//cellular process;GO:0006810//transport;GO:0044765//single-organism transport;GO:0055085//transmembrane transport;GO:0051234//establishment of localization;GO:0044699//single-organism process;GO:1902578//single-organism localization;GO:0008150//biological_process;GO:0051179//localization;GO:0044763//single-organism cellular process
ENSDARG00000002847	39	17	0.76	0.33	-1.203533394	0.014191013	0.05980033	no	fndc1	PREDICTED: fibronectin type III domain-containing protein 1 [Danio rerio]	-	-	-	-	-	-	-
ENSDARG00000002872	176.5	150.5	8.13	6.86	-0.245046776	0.314149577	0.554772726	no	zgc:113210	zgc:113210 [Source:ZFIN;Acc:ZDB-GENE-050320-83]	-	-	-	-	-	-	GO:0008150//biological_process
ENSDARG00000002877	287.5	484	7.095	10.77	0.60214366	3.74E-05	0.00042337	no	reps1	RALBP1 associated Eps domain containing 1 [Source:ZFIN;Acc:ZDB-GENE-030131-9536]	-	-	-	-	-	GO:0003674//molecular_function;GO:0005488//binding;GO:0043167//ion binding	GO:0016192//vesicle-mediated transport;GO:0051179//localization;GO:0006810//transport;GO:0051234//establishment of localization;GO:0008150//biological_process
ENSDARG00000002880	150.575	128.555	6.805	5.83	-0.223099278	0.270014002	0.507950421	no	vps50	PREDICTED: syndetin isoform X3 [Danio rerio]	-	-	-	-	-	-	-
ENSDARG00000002894	129.27	125.725	6.365	6.13	-0.05427344	0.839024903	0.985433375	no	aven	apoptosis, caspase activation inhibitor [Source:ZFIN;Acc:ZDB-GENE-041001-171]	-	-	-	-	-	GO:0003674//molecular_function	-
ENSDARG00000002897	53.5	81.5	1.6	2.42	0.596935142	0.080492055	0.21942381	no	si:ch211-160o17.2	si:ch211-160o17.2 [Source:ZFIN;Acc:ZDB-GENE-141219-3]	Environmental Information Processing;Metabolism	Carbohydrate metabolism;Signal transduction	ko04070//Phosphatidylinositol signaling system;ko00562//Inositol phosphate metabolism	K01107	-	-	GO:0044710//single-organism metabolic process;GO:0008152//metabolic process;GO:0008150//biological_process;GO:0044238//primary metabolic process;GO:0006629//lipid metabolic process;GO:0071704//organic substance metabolic process;GO:0044699//single-organism process
ENSDARG00000002909	543	728	29.73	41.105	0.46739443	0.02139543	0.08181969	no	tjp3	tight junction protein 3 [Source:ZFIN;Acc:ZDB-GENE-030828-10]	-	-	-	-	GO:0005575//cellular_component	-	GO:0065007//biological regulation;GO:0065008//regulation of biological quality;GO:0008150//biological_process;GO:0042592//homeostatic process
ENSDARG00000002912	314	256	14.875	12.09	-0.299075424	0.090761522	0.238629899	no	adipor1a	adiponectin receptor 1a [Source:ZFIN;Acc:ZDB-GENE-040718-169]	-	-	-	-	GO:0071944//cell periphery;GO:0016020//membrane;GO:0044464//cell part;GO:0005886//plasma membrane;GO:0005575//cellular_component;GO:0005623//cell	GO:0003674//molecular_function	GO:0050896//response to stimulus;GO:0050794//regulation of cellular process;GO:0044763//single-organism cellular process;GO:0044699//single-organism process;GO:0007165//signal transduction;GO:0050789//regulation of biological process;GO:0051716//cellular response to stimulus;GO:0009987//cellular process;GO:0023052//signaling;GO:0065007//biological regulation;GO:0008150//biological_process;GO:0044…
ENSDARG00000002916	289	331	8.71	9.76	0.164208429	0.301232336	0.539434632	no	sec31b	PREDICTED: protein transport protein Sec31A isoform X3 [Danio rerio]	Genetic Information Processing	Folding, sorting and degradation	ko04141//Protein processing in endoplasmic reticulum	K14005	-	-	-
ENSDARG00000002917	1.5	3	0.08	0.165	1.044394119	0.564345297	0.786306949	no	gls2b	glutaminase 2b (liver, mitochondrial) [Source:ZFIN;Acc:ZDB-GENE-050208-408]	-	-	-	-	GO:0043227//membrane-bounded organelle;GO:0044464//cell part;GO:0005623//cell;GO:0043231//intracellular membrane-bounded organelle;GO:0005739//mitochondrion;GO:0005622//intracellular;GO:0044444//cytoplasmic part;GO:0043226//organelle;GO:0005575//cellular_component;GO:0044424//intracellular part;GO:0043229//intracellular organelle;GO:0005737//cytoplasm	GO:0016787//hydrolase activity;GO:0016810//hydrolase activity, acting on carbon-nitrogen (but not peptide) bonds;GO:0003824//catalytic activity;GO:0003674//molecular_function	GO:0019752//carboxylic acid metabolic process;GO:0008150//biological_process;GO:0044710//single-organism metabolic process;GO:0044281//small molecule metabolic process;GO:0006082//organic acid metabolic process;GO:0006520//cellular amino acid metabolic process;GO:1901564//organonitrogen compound metabolic process;GO:0044699//single-organism process;GO:0043436//oxoacid metabolic process;GO:0009058…
ENSDARG00000002933	121.5	110	6.695	6.05	-0.146148913	0.555105688	0.77871014	no	gbx2	gastrulation brain homeobox 2 [Source:ZFIN;Acc:ZDB-GENE-020509-2]	-	-	-	-	GO:0005634//nucleus;GO:0043231//intracellular membrane-bounded organelle;GO:0005623//cell;GO:0005575//cellular_component;GO:0043229//intracellular organelle;GO:0044464//cell part;GO:0044424//intracellular part;GO:0005622//intracellular;GO:0043227//membrane-bounded organelle;GO:0043226//organelle	GO:0003677//DNA binding;GO:0005488//binding;GO:0003676//nucleic acid binding;GO:1901363//heterocyclic compound binding;GO:0097159//organic cyclic compound binding;GO:0003674//molecular_function	GO:0048856//anatomical structure development;GO:0008152//metabolic process;GO:0034641//cellular nitrogen compound metabolic process;GO:0044237//cellular metabolic process;GO:0008150//biological_process;GO:0009987//cellular process;GO:0009058//biosynthetic process;GO:0032502//developmental process;GO:0006807//nitrogen compound metabolic process
ENSDARG00000002937	599.5	699	35.13	40.475	0.204327504	0.238721719	0.469202488	no	meis1a	Meis homeobox 1 a [Source:ZFIN;Acc:ZDB-GENE-020122-3]	-	-	-	-	GO:0005622//intracellular;GO:0044464//cell part;GO:0043231//intracellular membrane-bounded organelle;GO:0043226//organelle;GO:0043227//membrane-bounded organelle;GO:0005623//cell;GO:0044424//intracellular part;GO:0005575//cellular_component;GO:0005634//nucleus;GO:0043229//intracellular organelle	GO:0003676//nucleic acid binding;GO:0097159//organic cyclic compound binding;GO:0005488//binding;GO:0003674//molecular_function;GO:1901363//heterocyclic compound binding;GO:0003677//DNA binding	GO:0034641//cellular nitrogen compound metabolic process;GO:0044237//cellular metabolic process;GO:0006807//nitrogen compound metabolic process;GO:0032502//developmental process;GO:0009987//cellular process;GO:0048856//anatomical structure development;GO:0009058//biosynthetic process;GO:0008150//biological_process;GO:0008152//metabolic process
ENSDARG00000002945	49	75	1.995	3.05	0.612420496	0.06035512	0.178001058	no	bgnb	biglycan b [Source:ZFIN;Acc:ZDB-GENE-040426-21]	-	-	-	-	GO:0005578//proteinaceous extracellular matrix;GO:0005622//intracellular;GO:0005737//cytoplasm;GO:0044464//cell part;GO:0005576//extracellular region;GO:0005575//cellular_component;GO:0044424//intracellular part;GO:0031012//extracellular matrix;GO:0005623//cell;GO:0044421//extracellular region part	GO:0098772//molecular function regulator;GO:0003674//molecular_function;GO:0030234//enzyme regulator activity	GO:0043170//macromolecule metabolic process;GO:0044238//primary metabolic process;GO:0008152//metabolic process;GO:0006464//cellular protein modification process;GO:0019538//protein metabolic process;GO:0044267//cellular protein metabolic process;GO:0036211//protein modification process;GO:0044700//single organism signaling;GO:0043412//macromolecule modification;GO:0009987//cellular process;GO:00…
ENSDARG00000002947	88.5	131.5	4.285	6.32	0.560629354	0.017780167	0.07085202	no	abcd3b	ATP-binding cassette, sub-family D (ALD), member 3b [Source:ZFIN;Acc:ZDB-GENE-050517-29]	-	-	-	-	GO:0043229//intracellular organelle;GO:0044444//cytoplasmic part;GO:0005623//cell;GO:0043227//membrane-bounded organelle;GO:0005737//cytoplasm;GO:0043226//organelle;GO:0044424//intracellular part;GO:0043231//intracellular membrane-bounded organelle;GO:0005777//peroxisome;GO:0005622//intracellular;GO:0005575//cellular_component;GO:0042579//microbody;GO:0044464//cell part	GO:0016818//hydrolase activity, acting on acid anhydrides, in phosphorus-containing anhydrides;GO:0022857//transmembrane transporter activity;GO:0016817//hydrolase activity, acting on acid anhydrides;GO:0003674//molecular_function;GO:0017111//nucleoside-triphosphatase activity;GO:0003824//catalytic activity;GO:0043167//ion binding;GO:0005488//binding;GO:0016887//ATPase activity;GO:0005215//transp…	GO:0051179//localization;GO:0044765//single-organism transport;GO:0044699//single-organism process;GO:0008150//biological_process;GO:0044763//single-organism cellular process;GO:0051234//establishment of localization;GO:1902578//single-organism localization;GO:0009987//cellular process;GO:0055085//transmembrane transport;GO:0006810//transport
ENSDARG00000002949	746.5	699	51.93	48.165	-0.10858306	0.545731211	0.769909164	no	ppp6c	protein phosphatase 6, catalytic subunit [Source:ZFIN;Acc:ZDB-GENE-040426-949]	-	-	-	-	GO:0005575//cellular_component	GO:0003674//molecular_function;GO:0003824//catalytic activity;GO:0042578//phosphoric ester hydrolase activity;GO:0016788//hydrolase activity, acting on ester bonds;GO:0016787//hydrolase activity;GO:0016791//phosphatase activity	GO:0043170//macromolecule metabolic process;GO:0006464//cellular protein modification process;GO:0044237//cellular metabolic process;GO:0009987//cellular process;GO:0044260//cellular macromolecule metabolic process;GO:0008152//metabolic process;GO:0044267//cellular protein metabolic process;GO:0044238//primary metabolic process;GO:0036211//protein modification process;GO:0071704//organic substanc…
ENSDARG00000002952	769	727	14.315	13.455	-0.089385279	0.620694519	0.833996585	no	smo	smoothened, frizzled class receptor [Source:ZFIN;Acc:ZDB-GENE-980526-89]	Environmental Information Processing	Signal transduction	ko04340//Hedgehog signaling pathway	K06226	GO:0044464//cell part;GO:0005929//cilium;GO:0042995//cell projection;GO:0005575//cellular_component;GO:0005623//cell;GO:0043226//organelle	GO:0004871//signal transducer activity;GO:0003674//molecular_function;GO:0005488//binding;GO:0008289//lipid binding	GO:0071840//cellular component organization or biogenesis;GO:0050794//regulation of cellular process;GO:0009790//embryo development;GO:0050789//regulation of biological process;GO:0044699//single-organism process;GO:0048869//cellular developmental process;GO:0048646//anatomical structure formation involved in morphogenesis;GO:0032989//cellular component morphogenesis;GO:0006996//organelle organiz…
ENSDARG00000002956	1	3.5	0.03	0.09	1.584962501	0.248738549	0.482525025	no	si:dkey-32n7.4	si:dkey-32n7.4 [Source:ZFIN;Acc:ZDB-GENE-110411-175]	Cellular Processes	Cell motility	ko04810//Regulation of actin cytoskeleton	K06462	GO:0005575//cellular_component;GO:0032991//macromolecular complex;GO:0005623//cell;GO:0005886//plasma membrane;GO:0043234//protein complex;GO:0044464//cell part;GO:0071944//cell periphery;GO:0016020//membrane	-	GO:0050896//response to stimulus;GO:0050789//regulation of biological process;GO:0051716//cellular response to stimulus;GO:0007155//cell adhesion;GO:0044763//single-organism cellular process;GO:0008150//biological_process;GO:0009987//cellular process;GO:0065007//biological regulation;GO:0044700//single organism signaling;GO:0022610//biological adhesion;GO:0044699//single-organism process;GO:00071…
ENSDARG00000002959	0	0.5	0.001	0.04	5.321928095	1	1	no	gpr34b	G protein-coupled receptor 34b [Source:ZFIN;Acc:ZDB-GENE-040823-1]	-	-	-	-	GO:0016020//membrane;GO:0005886//plasma membrane;GO:0044464//cell part;GO:0005575//cellular_component;GO:0005623//cell;GO:0071944//cell periphery	GO:0003674//molecular_function;GO:0004871//signal transducer activity	GO:0050789//regulation of biological process;GO:0051716//cellular response to stimulus;GO:0044763//single-organism cellular process;GO:0050794//regulation of cellular process;GO:0007165//signal transduction;GO:0065007//biological regulation;GO:0044700//single organism signaling;GO:0023052//signaling;GO:0007154//cell communication;GO:0044699//single-organism process;GO:0050896//response to stimulu…
ENSDARG00000002967	235.5	367	19.135	29.47	0.623033159	0.002539787	0.015085535	no	pdap1b	pdgfa associated protein 1b [Source:ZFIN;Acc:ZDB-GENE-040426-942]	-	-	-	-	GO:0005575//cellular_component	GO:0003674//molecular_function	GO:0008150//biological_process
ENSDARG00000002968	250	284	14.375	15.3	0.089969697	0.372603416	0.620166945	no	a1cf	apobec1 complementation factor [Source:ZFIN;Acc:ZDB-GENE-060824-3]	-	-	-	-	GO:0032991//macromolecular complex;GO:0044464//cell part;GO:0043226//organelle;GO:0005622//intracellular;GO:0005575//cellular_component;GO:0005634//nucleus;GO:0044424//intracellular part;GO:0043234//protein complex;GO:0043227//membrane-bounded organelle;GO:0043231//intracellular membrane-bounded organelle;GO:0043229//intracellular organelle;GO:0005623//cell	GO:0005488//binding;GO:0097159//organic cyclic compound binding;GO:0003723//RNA binding;GO:0003676//nucleic acid binding;GO:1901363//heterocyclic compound binding;GO:0003674//molecular_function	GO:0044237//cellular metabolic process;GO:0006807//nitrogen compound metabolic process;GO:0008152//metabolic process;GO:0034641//cellular nitrogen compound metabolic process;GO:0008150//biological_process;GO:0009987//cellular process
ENSDARG00000002970	1452	1052	81.37	58.575	-0.474211942	0.006688375	0.032996051	no	ss18	synovial sarcoma translocation, chromosome 18 (H. sapiens) [Source:ZFIN;Acc:ZDB-GENE-030131-4867]	-	-	-	-	GO:0005575//cellular_component	GO:0000988//transcription factor activity, protein binding;GO:0003674//molecular_function	GO:0009987//cellular process;GO:0008150//biological_process;GO:0009058//biosynthetic process;GO:0008152//metabolic process;GO:0034641//cellular nitrogen compound metabolic process;GO:0006807//nitrogen compound metabolic process;GO:0044237//cellular metabolic process
ENSDARG00000002971	434	397	11.96	10.825	-0.143850365	0.431329536	0.675599441	no	phc1	polyhomeotic homolog 1 [Source:ZFIN;Acc:ZDB-GENE-081022-39]	-	-	-	-	GO:0043226//organelle;GO:0005634//nucleus;GO:0043229//intracellular organelle;GO:0044464//cell part;GO:0043231//intracellular membrane-bounded organelle;GO:0043227//membrane-bounded organelle;GO:0005622//intracellular;GO:0044424//intracellular part;GO:0005575//cellular_component;GO:0005623//cell	GO:0043167//ion binding;GO:0005488//binding;GO:0003674//molecular_function	GO:0008150//biological_process
ENSDARG00000002986	0	2	0.001	0.12	6.906890596	0.151101037	0.341420874	no	gda	guanine deaminase [Source:ZFIN;Acc:ZDB-GENE-050522-434]	Metabolism	Nucleotide metabolism	ko00230//Purine metabolism	K01487	-	GO:0016787//hydrolase activity;GO:0003674//molecular_function;GO:0005488//binding;GO:0003824//catalytic activity;GO:0016810//hydrolase activity, acting on carbon-nitrogen (but not peptide) bonds;GO:0043167//ion binding	GO:0044710//single-organism metabolic process;GO:0044699//single-organism process;GO:0009987//cellular process;GO:0008150//biological_process;GO:0009056//catabolic process;GO:0044281//small molecule metabolic process;GO:0006807//nitrogen compound metabolic process;GO:0008152//metabolic process;GO:0034641//cellular nitrogen compound metabolic process;GO:0044237//cellular metabolic process
ENSDARG00000002988	1297.5	1517	157.86	188.955	0.25939704	0.225847408	0.450536322	no	tnnt2d	troponin T2d, cardiac [Source:ZFIN;Acc:ZDB-GENE-050626-97]	-	-	-	-	GO:0044424//intracellular part;GO:0005622//intracellular;GO:0044464//cell part;GO:0005623//cell;GO:0043229//intracellular organelle;GO:0043232//intracellular non-membrane-bounded organelle;GO:0005737//cytoplasm;GO:0043226//organelle;GO:0043228//non-membrane-bounded organelle;GO:0043234//protein complex;GO:0005575//cellular_component;GO:0032991//macromolecular complex;GO:0005856//cytoskeleton	GO:0003674//molecular_function	GO:0022607//cellular component assembly;GO:0007010//cytoskeleton organization;GO:0048856//anatomical structure development;GO:0044763//single-organism cellular process;GO:0009987//cellular process;GO:0048869//cellular developmental process;GO:0030154//cell differentiation;GO:0008150//biological_process;GO:0044085//cellular component biogenesis;GO:0044767//single-organism developmental process;GO:…
ENSDARG00000002991	295	362	9.225	11.36	0.300342019	0.124054628	0.298462142	no	cep135	centrosomal protein 135 [Source:ZFIN;Acc:ZDB-GENE-041210-325]	-	-	-	-	GO:0043228//non-membrane-bounded organelle;GO:0044424//intracellular part;GO:0044430//cytoskeletal part;GO:0044464//cell part;GO:0005815//microtubule organizing center;GO:0044446//intracellular organelle part;GO:0043226//organelle;GO:0005575//cellular_component;GO:0005622//intracellular;GO:0043229//intracellular organelle;GO:0005623//cell;GO:0005856//cytoskeleton;GO:0015630//microtubule cytoskele…	-	GO:0044085//cellular component biogenesis;GO:0022607//cellular component assembly;GO:0006996//organelle organization;GO:0071840//cellular component organization or biogenesis;GO:0009987//cellular process;GO:0007010//cytoskeleton organization;GO:0044763//single-organism cellular process;GO:0007049//cell cycle;GO:0016043//cellular component organization;GO:0008150//biological_process;GO:0044699//si…
ENSDARG00000002994	283	248.5	9.82	8.545	-0.200642533	0.278795526	0.516379702	no	itpkca	inositol-trisphosphate 3-kinase Ca [Source:ZFIN;Acc:ZDB-GENE-030131-6009]	Metabolism;Environmental Information Processing	Signal transduction;Carbohydrate metabolism	ko04020//Calcium signaling pathway;ko04070//Phosphatidylinositol signaling system;ko00562//Inositol phosphate metabolism	K00911	-	GO:0003824//catalytic activity;GO:0003674//molecular_function;GO:0016740//transferase activity;GO:0016772//transferase activity, transferring phosphorus-containing groups;GO:0016301//kinase activity	GO:0008150//biological_process;GO:0044281//small molecule metabolic process;GO:0008152//metabolic process;GO:0009058//biosynthetic process;GO:0044699//single-organism process;GO:0044710//single-organism metabolic process
ENSDARG00000003008	195.5	147	4.94	3.68	-0.424805276	0.043060693	0.138690006	no	prkcea	protein kinase C, epsilon a [Source:ZFIN;Acc:ZDB-GENE-030131-8191]	Cellular Processes;Organismal Systems	Circulatory system;Cellular commiunity	ko04530//Tight junction;ko04270//Vascular smooth muscle contraction	K18050	GO:0005623//cell;GO:0044464//cell part;GO:0005575//cellular_component;GO:0005622//intracellular	GO:0016740//transferase activity;GO:0016772//transferase activity, transferring phosphorus-containing groups;GO:0003674//molecular_function;GO:0003824//catalytic activity;GO:0043167//ion binding;GO:0016301//kinase activity;GO:0005488//binding	GO:0050794//regulation of cellular process;GO:0008152//metabolic process;GO:0050789//regulation of biological process;GO:0044260//cellular macromolecule metabolic process;GO:0036211//protein modification process;GO:0044763//single-organism cellular process;GO:0043412//macromolecule modification;GO:0043170//macromolecule metabolic process;GO:0050896//response to stimulus;GO:0008150//biological_pro…
ENSDARG00000003017	187	203.5	12.01	12.94	0.107601466	0.587147314	0.807195633	no	ube2al	ubiquitin conjugating enzyme E2 A, like [Source:ZFIN;Acc:ZDB-GENE-030131-4195]	Genetic Information Processing	Folding, sorting and degradation	ko04120//Ubiquitin mediated proteolysis	K10573	GO:0032991//macromolecular complex;GO:0044424//intracellular part;GO:0005622//intracellular;GO:0043226//organelle;GO:0044464//cell part;GO:0031981//nuclear lumen;GO:0005634//nucleus;GO:0043229//intracellular organelle;GO:0044428//nuclear part;GO:0005737//cytoplasm;GO:0043231//intracellular membrane-bounded organelle;GO:0043234//protein complex;GO:0044422//organelle part;GO:0044446//intracellular …	GO:0019899//enzyme binding;GO:0003674//molecular_function;GO:0005488//binding;GO:0005515//protein binding;GO:0043167//ion binding	GO:0006807//nitrogen compound metabolic process;GO:0006996//organelle organization;GO:0044237//cellular metabolic process;GO:0019538//protein metabolic process;GO:0034641//cellular nitrogen compound metabolic process;GO:0050896//response to stimulus;GO:0071704//organic substance metabolic process;GO:0006950//response to stress;GO:0009056//catabolic process;GO:0044267//cellular protein metabolic p…
ENSDARG00000003020	25.5	17.5	1.525	1.03	-0.566164905	0.208179602	0.426299059	no	lrrc4.2	leucine rich repeat containing 4.2 [Source:ZFIN;Acc:ZDB-GENE-030131-7997]	Environmental Information Processing	Signaling molecules and interaction	ko04514//Cell adhesion molecules (CAMs)	K16351	GO:0005737//cytoplasm;GO:0005622//intracellular;GO:0044424//intracellular part;GO:0005575//cellular_component;GO:0005623//cell;GO:0044464//cell part	GO:0030234//enzyme regulator activity;GO:0098772//molecular function regulator;GO:0003674//molecular_function	GO:0007154//cell communication;GO:0044260//cellular macromolecule metabolic process;GO:0044763//single-organism cellular process;GO:0050789//regulation of biological process;GO:0043412//macromolecule modification;GO:0044700//single organism signaling;GO:0051716//cellular response to stimulus;GO:0050794//regulation of cellular process;GO:0008150//biological_process;GO:0044699//single-organism proc…
ENSDARG00000003021	194	156	12.11	9.92	-0.287786839	0.193401438	0.404816274	no	hdac8	histone deacetylase 8 [Source:ZFIN;Acc:ZDB-GENE-040426-2772]	-	-	-	-	GO:0005622//intracellular;GO:0044464//cell part;GO:0005575//cellular_component;GO:0043227//membrane-bounded organelle;GO:0043229//intracellular organelle;GO:0044424//intracellular part;GO:0005634//nucleus;GO:0043231//intracellular membrane-bounded organelle;GO:0043226//organelle;GO:0005623//cell	GO:0003674//molecular_function;GO:0005488//binding;GO:0016810//hydrolase activity, acting on carbon-nitrogen (but not peptide) bonds;GO:0043167//ion binding;GO:0016787//hydrolase activity;GO:0003824//catalytic activity	GO:0043412//macromolecule modification;GO:0051276//chromosome organization;GO:0071704//organic substance metabolic process;GO:0006464//cellular protein modification process;GO:0044260//cellular macromolecule metabolic process;GO:0034641//cellular nitrogen compound metabolic process;GO:0043170//macromolecule metabolic process;GO:0044267//cellular protein metabolic process;GO:0044237//cellular meta…
ENSDARG00000003022	62.5	107	3.68	6.73	0.870900739	0.004866469	0.025412182	no	limk1b	LIM domain kinase 1b [Source:ZFIN;Acc:ZDB-GENE-110411-106]	-	-	-	-	GO:0044444//cytoplasmic part;GO:0005794//Golgi apparatus;GO:0043227//membrane-bounded organelle;GO:0005623//cell;GO:0005575//cellular_component;GO:0043226//organelle;GO:0005737//cytoplasm;GO:0005634//nucleus;GO:0043231//intracellular membrane-bounded organelle;GO:0012505//endomembrane system;GO:0044464//cell part;GO:0043229//intracellular organelle;GO:0044424//intracellular part;GO:0005622//intra…	GO:0016301//kinase activity;GO:0016772//transferase activity, transferring phosphorus-containing groups;GO:0004871//signal transducer activity;GO:0003674//molecular_function;GO:0003824//catalytic activity;GO:0043167//ion binding;GO:0005488//binding;GO:0016740//transferase activity	GO:0007010//cytoskeleton organization;GO:0043170//macromolecule metabolic process;GO:0008150//biological_process;GO:0009987//cellular process;GO:0019538//protein metabolic process;GO:0050789//regulation of biological process;GO:0044085//cellular component biogenesis;GO:0044700//single organism signaling;GO:0006464//cellular protein modification process;GO:0006996//organelle organization;GO:004426…
ENSDARG00000003027	49	49	4.145	4.09	-0.019271259	1	1	no	scnm1	sodium channel modifier 1 [Source:ZFIN;Acc:ZDB-GENE-030131-415]	-	-	-	-	GO:0005634//nucleus;GO:0005654//nucleoplasm;GO:0043227//membrane-bounded organelle;GO:0005623//cell;GO:0043233//organelle lumen;GO:0031974//membrane-enclosed lumen;GO:0005575//cellular_component;GO:0043231//intracellular membrane-bounded organelle;GO:0005622//intracellular;GO:0044428//nuclear part;GO:0043229//intracellular organelle;GO:0043226//organelle;GO:0044424//intracellular part;GO:0044422/…	GO:0003674//molecular_function;GO:0043167//ion binding;GO:0005488//binding	GO:0008150//biological_process;GO:0010467//gene expression;GO:0006725//cellular aromatic compound metabolic process;GO:0016070//RNA metabolic process;GO:0043170//macromolecule metabolic process;GO:0044237//cellular metabolic process;GO:1901360//organic cyclic compound metabolic process;GO:0006139//nucleobase-containing compound metabolic process;GO:0071704//organic substance metabolic process;GO:…
ENSDARG00000003032	2789	1749	143.66	89.19	-0.687704552	0.000379075	0.003104166	no	eif4a1b	eukaryotic translation initiation factor 4A1B [Source:ZFIN;Acc:ZDB-GENE-040120-6]	Genetic Information Processing	Translation	ko03013//RNA transport	K03257	GO:0005575//cellular_component;GO:0031974//membrane-enclosed lumen;GO:0070013//intracellular organelle lumen;GO:0043232//intracellular non-membrane-bounded organelle;GO:0044424//intracellular part;GO:0044428//nuclear part;GO:0044464//cell part;GO:0005730//nucleolus;GO:0044446//intracellular organelle part;GO:0043229//intracellular organelle;GO:0005623//cell;GO:0005737//cytoplasm;GO:0043231//intra…	GO:0008135//translation factor activity, RNA binding;GO:0003723//RNA binding;GO:0005488//binding;GO:0003674//molecular_function;GO:0016887//ATPase activity;GO:0003824//catalytic activity;GO:0003676//nucleic acid binding;GO:0017111//nucleoside-triphosphatase activity;GO:0016462//pyrophosphatase activity;GO:0016818//hydrolase activity, acting on acid anhydrides, in phosphorus-containing anhydrides;…	GO:0008150//biological_process;GO:1901576//organic substance biosynthetic process;GO:1901564//organonitrogen compound metabolic process;GO:1901566//organonitrogen compound biosynthetic process;GO:0034645//cellular macromolecule biosynthetic process;GO:0010467//gene expression;GO:0009059//macromolecule biosynthetic process;GO:0044260//cellular macromolecule metabolic process;GO:0008152//metabolic …
ENSDARG00000003035	2391.5	4598	62.43	118.6	0.925792639	1.56E-05	0.000197475	no	hspa9	heat shock protein 9 [Source:ZFIN;Acc:ZDB-GENE-030828-12]	-	-	-	-	GO:0005575//cellular_component;GO:0043226//organelle;GO:0043231//intracellular membrane-bounded organelle;GO:0005739//mitochondrion;GO:0005623//cell;GO:0044464//cell part;GO:0005737//cytoplasm;GO:0043229//intracellular organelle;GO:0005622//intracellular;GO:0044444//cytoplasmic part;GO:0043227//membrane-bounded organelle;GO:0044424//intracellular part	GO:0043167//ion binding;GO:0051082//unfolded protein binding;GO:0016817//hydrolase activity, acting on acid anhydrides;GO:0005515//protein binding;GO:0005488//binding;GO:0016887//ATPase activity;GO:0016787//hydrolase activity;GO:0016462//pyrophosphatase activity;GO:0016818//hydrolase activity, acting on acid anhydrides, in phosphorus-containing anhydrides;GO:0003674//molecular_function;GO:0017111…	GO:0006457//protein folding;GO:0050896//response to stimulus;GO:0009987//cellular process;GO:0002376//immune system process;GO:0032502//developmental process;GO:0006950//response to stress;GO:0040007//growth;GO:0048856//anatomical structure development;GO:0008150//biological_process
ENSDARG00000003041	45	71	4.2	6.555	0.642206453	0.024683362	0.091422071	no	CABZ01111496.1	-	-	-	-	-	-	GO:0003674//molecular_function	GO:0071704//organic substance metabolic process;GO:0008152//metabolic process;GO:0007154//cell communication;GO:0019538//protein metabolic process;GO:0008150//biological_process;GO:0023052//signaling;GO:0043412//macromolecule modification;GO:0050794//regulation of cellular process;GO:0002376//immune system process;GO:0009987//cellular process;GO:0065007//biological regulation;GO:0036211//protein …
ENSDARG00000003046	129.5	69	3.7	1.96	-0.916671616	0.000219495	0.001954472	no	sorbs2a	sorbin and SH3 domain containing 2a [Source:ZFIN;Acc:ZDB-GENE-070308-2]	-	-	-	-	-	-	GO:0006996//organelle organization;GO:0008150//biological_process;GO:0016043//cellular component organization;GO:0009987//cellular process;GO:0071840//cellular component organization or biogenesis;GO:0007010//cytoskeleton organization
ENSDARG00000003054	0.5	1.5	0.015	0.045	1.584962501	0.646670116	0.84969994	no	tacr3l	tachykinin receptor 3-like [Source:ZFIN;Acc:ZDB-GENE-061207-19]	Environmental Information Processing	Signaling molecules and interaction;Signal transduction	ko04080//Neuroactive ligand-receptor interaction;ko04020//Calcium signaling pathway	K04224	GO:0005575//cellular_component;GO:0005886//plasma membrane;GO:0071944//cell periphery;GO:0005623//cell;GO:0016020//membrane;GO:0044464//cell part	GO:0003674//molecular_function;GO:0004871//signal transducer activity	GO:0007154//cell communication;GO:0050789//regulation of biological process;GO:0023052//signaling;GO:0044700//single organism signaling;GO:0044763//single-organism cellular process;GO:0009987//cellular process;GO:0044699//single-organism process;GO:0050794//regulation of cellular process;GO:0007165//signal transduction;GO:0051716//cellular response to stimulus;GO:0050896//response to stimulus;GO:…
ENSDARG00000003058	159	184	15.47	15.84	0.034099139	0.321571154	0.564187959	no	fgfr1op	FGFR1 oncogene partner [Source:ZFIN;Acc:ZDB-GENE-090417-1]	-	-	-	-	GO:0005623//cell;GO:0044422//organelle part;GO:0044430//cytoskeletal part;GO:0005622//intracellular;GO:0005856//cytoskeleton;GO:0043228//non-membrane-bounded organelle;GO:0015630//microtubule cytoskeleton;GO:0043229//intracellular organelle;GO:0044424//intracellular part;GO:0043226//organelle;GO:0044446//intracellular organelle part;GO:0005575//cellular_component;GO:0043232//intracellular non-mem…	GO:0043167//ion binding;GO:0003674//molecular_function;GO:0005488//binding	GO:0016043//cellular component organization;GO:0006996//organelle organization;GO:0009987//cellular process;GO:0071840//cellular component organization or biogenesis;GO:0007010//cytoskeleton organization;GO:0008150//biological_process
ENSDARG00000003061	305	283.775	19.475	18.8	-0.050890666	0.568519251	0.790203187	no	cd276	CD276 molecule [Source:ZFIN;Acc:ZDB-GENE-070112-452]	Environmental Information Processing	Signaling molecules and interaction	ko04514//Cell adhesion molecules (CAMs)	K06746	GO:0005575//cellular_component	GO:0003674//molecular_function	-
ENSDARG00000003068	297	350	6.68	7.815	0.226397771	0.233169889	0.461174304	no	gorasp1a	Golgi reassembly-stacking protein 1 [Danio rerio]	-	-	-	-	-	-	-
ENSDARG00000003069	57.5	40.5	1.705	1.195	-0.512761121	0.099234972	0.254586066	no	btbd7	BTB/POZ domain-containing protein 7 [Danio rerio]	-	-	-	-	-	-	-
ENSDARG00000003077	44	9	4.18	0.725	-2.527450042	1.53E-07	3.04E-06	yes	si:ch73-111m19.2	si:ch73-111m19.2 [Source:ZFIN;Acc:ZDB-GENE-130603-13]	-	-	-	-	-	GO:0003824//catalytic activity;GO:0016491//oxidoreductase activity;GO:0003674//molecular_function	GO:0008150//biological_process;GO:0006950//response to stress;GO:0050896//response to stimulus
ENSDARG00000003081	4127.5	3574.5	352.95	297.585	-0.246162013	0.227253131	0.452750117	no	mybphb	myosin binding protein Hb [Source:ZFIN;Acc:ZDB-GENE-030131-9794]	-	-	-	-	GO:0005623//cell;GO:0043234//protein complex;GO:0043226//organelle;GO:0043229//intracellular organelle;GO:0005622//intracellular;GO:0044464//cell part;GO:0044424//intracellular part;GO:0032991//macromolecular complex;GO:0043228//non-membrane-bounded organelle;GO:0005575//cellular_component;GO:0005737//cytoplasm;GO:0043232//intracellular non-membrane-bounded organelle;GO:0005856//cytoskeleton	GO:0005515//protein binding;GO:0005488//binding;GO:0005198//structural molecule activity;GO:0008092//cytoskeletal protein binding;GO:0003674//molecular_function	GO:0048856//anatomical structure development;GO:0070271//protein complex biogenesis;GO:0048646//anatomical structure formation involved in morphogenesis;GO:0071840//cellular component organization or biogenesis;GO:0044699//single-organism process;GO:0030154//cell differentiation;GO:0009987//cellular process;GO:0065003//macromolecular complex assembly;GO:0044767//single-organism developmental proc…
ENSDARG00000003084	13	12.5	0.46	0.39	-0.238159737	1	1	no	spire2	spire-type actin nucleation factor 2 [Source:ZFIN;Acc:ZDB-GENE-041114-29]	Organismal Systems	Development	ko04320//Dorso-ventral axis formation	K02098	-	GO:0005488//binding;GO:0008092//cytoskeletal protein binding;GO:0005515//protein binding;GO:0003674//molecular_function	GO:0006810//transport;GO:0016043//cellular component organization;GO:0051179//localization;GO:0051234//establishment of localization;GO:0009987//cellular process;GO:0070271//protein complex biogenesis;GO:0006996//organelle organization;GO:0071822//protein complex subunit organization;GO:0006461//protein complex assembly;GO:0007010//cytoskeleton organization;GO:0065003//macromolecular complex asse…
ENSDARG00000003085	35.5	60.5	1.575	2.62	0.734214983	0.01546178	0.063998714	no	stambpl1	PREDICTED: AMSH-like protease isoform X3 [Danio rerio]	-	-	-	-	-	-	-
ENSDARG00000003087	217	202.5	12.285	11.4	-0.107864033	0.618209027	0.832588257	no	ubxn6	UBX domain-containing protein 6 [Danio rerio]	Genetic Information Processing	Folding, sorting and degradation	ko04141//Protein processing in endoplasmic reticulum	K14011	-	-	-
ENSDARG00000003090	0	0	0.001	0.001	0	1	1	notest	or103-4	odorant receptor, family C, subfamily 103, member 4 [Source:ZFIN;Acc:ZDB-GENE-000329-12]	-	-	-	-	GO:0044464//cell part;GO:0071944//cell periphery;GO:0005575//cellular_component;GO:0005623//cell;GO:0005886//plasma membrane;GO:0016020//membrane	GO:0004871//signal transducer activity;GO:0003674//molecular_function	GO:0032501//multicellular organismal process;GO:0065007//biological regulation;GO:0008150//biological_process;GO:0050896//response to stimulus;GO:0023052//signaling;GO:0044699//single-organism process;GO:0050877//neurological system process;GO:0051716//cellular response to stimulus;GO:0044763//single-organism cellular process;GO:0003008//system process;GO:0009987//cellular process;GO:0007154//cel…
ENSDARG00000003091	249.5	384.5	16.005	23.42	0.549218399	0.000640996	0.004860425	no	oclnb	occludin b [Source:ZFIN;Acc:ZDB-GENE-041212-43]	Cellular Processes;Environmental Information Processing	Cellular commiunity;Signaling molecules and interaction	ko04530//Tight junction;ko04514//Cell adhesion molecules (CAMs)	K06088	GO:0005575//cellular_component	-	-
ENSDARG00000003098	2568	1435	61.075	37.035	-0.721692621	2.84E-06	4.28E-05	no	kdm5bb	lysine (K)-specific demethylase 5Bb [Source:ZFIN;Acc:ZDB-GENE-030424-1]	-	-	-	-	GO:0043229//intracellular organelle;GO:0005575//cellular_component;GO:0043231//intracellular membrane-bounded organelle;GO:0005622//intracellular;GO:0005634//nucleus;GO:0044464//cell part;GO:0043226//organelle;GO:0043227//membrane-bounded organelle;GO:0005623//cell;GO:0044424//intracellular part	GO:0003677//DNA binding;GO:0097159//organic cyclic compound binding;GO:0005488//binding;GO:0043167//ion binding;GO:0003674//molecular_function;GO:0003676//nucleic acid binding;GO:1901363//heterocyclic compound binding	-
ENSDARG00000003109	326.5	535	24.08	38.035	0.659492213	0.000250307	0.002191263	no	rcan1a	regulator of calcineurin 1a [Source:ZFIN;Acc:ZDB-GENE-040801-135]	-	-	-	-	GO:0005623//cell;GO:0005737//cytoplasm;GO:0005622//intracellular;GO:0005575//cellular_component;GO:0044464//cell part;GO:0044424//intracellular part	GO:0003674//molecular_function;GO:0098772//molecular function regulator;GO:0030234//enzyme regulator activity	GO:0065007//biological regulation;GO:0044699//single-organism process;GO:0044238//primary metabolic process;GO:0036211//protein modification process;GO:0050896//response to stimulus;GO:0043412//macromolecule modification;GO:0048856//anatomical structure development;GO:0019538//protein metabolic process;GO:0007165//signal transduction;GO:0032502//developmental process;GO:0008152//metabolic process…
ENSDARG00000003113	154.5	186	7.695	9.19	0.256143535	0.20902458	0.427533339	no	ada	adenosine deaminase [Source:ZFIN;Acc:ZDB-GENE-040718-393]	Metabolism	Nucleotide metabolism	ko00230//Purine metabolism	K01488	-	GO:0003674//molecular_function;GO:0016810//hydrolase activity, acting on carbon-nitrogen (but not peptide) bonds;GO:0016787//hydrolase activity;GO:0003824//catalytic activity	GO:0044281//small molecule metabolic process;GO:0044237//cellular metabolic process;GO:0009058//biosynthetic process;GO:0009987//cellular process;GO:0044699//single-organism process;GO:0044710//single-organism metabolic process;GO:0008150//biological_process;GO:0006807//nitrogen compound metabolic process;GO:0008152//metabolic process;GO:0034641//cellular nitrogen compound metabolic process
ENSDARG00000003127	476	524.5	28.84	32.235	0.160556819	0.50332808	0.743504976	no	zgc:123105	zgc:123105 [Source:ZFIN;Acc:ZDB-GENE-051113-272]	-	-	-	-	GO:0005575//cellular_component;GO:0044424//intracellular part;GO:0044464//cell part;GO:0005622//intracellular;GO:0005737//cytoplasm;GO:0005623//cell	GO:0016491//oxidoreductase activity;GO:0003824//catalytic activity;GO:0003674//molecular_function	GO:0008150//biological_process
ENSDARG00000003142	107.5	178	4.67	7.67	0.715804028	0.002366153	0.014175292	no	dachc	dachshund c [Source:ZFIN;Acc:ZDB-GENE-020402-5]	-	-	-	-	GO:0005634//nucleus;GO:0043234//protein complex;GO:0043227//membrane-bounded organelle;GO:0044424//intracellular part;GO:0005575//cellular_component;GO:0005622//intracellular;GO:0043229//intracellular organelle;GO:0032991//macromolecular complex;GO:0044464//cell part;GO:0005623//cell;GO:0043231//intracellular membrane-bounded organelle;GO:0043226//organelle	GO:0001071//nucleic acid binding transcription factor activity;GO:0003700//transcription factor activity, sequence-specific DNA binding;GO:0003674//molecular_function	GO:0043933//macromolecular complex subunit organization;GO:0048856//anatomical structure development;GO:0016043//cellular component organization;GO:0009058//biosynthetic process;GO:0071840//cellular component organization or biogenesis;GO:0022607//cellular component assembly;GO:0006807//nitrogen compound metabolic process;GO:0065003//macromolecular complex assembly;GO:0044237//cellular metabolic …
ENSDARG00000003144	10	27	0.86	2.315	1.428603629	0.001725244	0.010956467	yes	pxmp2	peroxisomal membrane protein 2 [Source:ZFIN;Acc:ZDB-GENE-040912-184]	Cellular Processes	Transport and catabolism	ko04146//Peroxisome	K13347	GO:0044444//cytoplasmic part;GO:0005622//intracellular;GO:0005623//cell;GO:0043229//intracellular organelle;GO:0044424//intracellular part;GO:0043226//organelle;GO:0043231//intracellular membrane-bounded organelle;GO:0042579//microbody;GO:0043227//membrane-bounded organelle;GO:0005575//cellular_component;GO:0005777//peroxisome;GO:0044464//cell part;GO:0005737//cytoplasm	GO:0003674//molecular_function	GO:0008150//biological_process
ENSDARG00000003146	10.5	7.5	0.61	0.63	0.046542586	0.469702652	0.713409391	no	si:dkey-27m7.4	si:dkey-27m7.4 [Source:ZFIN;Acc:ZDB-GENE-090313-297]	-	-	-	-	GO:0043232//intracellular non-membrane-bounded organelle;GO:0005622//intracellular;GO:0005575//cellular_component;GO:0005737//cytoplasm;GO:0005623//cell;GO:0043226//organelle;GO:0044464//cell part;GO:0044424//intracellular part;GO:0005856//cytoskeleton;GO:0043228//non-membrane-bounded organelle;GO:0043229//intracellular organelle	GO:0005198//structural molecule activity;GO:0003674//molecular_function	GO:0044767//single-organism developmental process;GO:0044699//single-organism process;GO:0048856//anatomical structure development;GO:0032502//developmental process;GO:0008150//biological_process;GO:0044763//single-organism cellular process;GO:0030154//cell differentiation;GO:0009987//cellular process;GO:0048869//cellular developmental process
ENSDARG00000003151	1934	1950	201.95	202.075	0.000892702	0.997504216	1	no	skp1	S-phase kinase-associated protein 1 [Source:ZFIN;Acc:ZDB-GENE-040426-1707]	Genetic Information Processing;Environmental Information Processing;Cellular Processes	Folding, sorting and degradation;Cell growth and death;Signal transduction	ko04141//Protein processing in endoplasmic reticulum;ko04310//Wnt signaling pathway;ko04120//Ubiquitin mediated proteolysis;ko04110//Cell cycle;ko04114//Oocyte meiosis;ko04350//TGF-beta signaling pathway	K03094	-	GO:0016740//transferase activity;GO:0003824//catalytic activity;GO:0003674//molecular_function;GO:0016301//kinase activity;GO:0016772//transferase activity, transferring phosphorus-containing groups	GO:0008152//metabolic process;GO:0008150//biological_process;GO:0009056//catabolic process
ENSDARG00000003153	562.5	423	54.105	40.435	-0.420157312	0.018603165	0.073442812	no	nudt21	nudix hydrolase 21 [Source:ZFIN;Acc:ZDB-GENE-040426-1316]	Genetic Information Processing	Translation	ko03015//mRNA surveillance pathway	K14397	GO:0005737//cytoplasm;GO:0044446//intracellular organelle part;GO:0005622//intracellular;GO:0005623//cell;GO:0043226//organelle;GO:0043231//intracellular membrane-bounded organelle;GO:0043233//organelle lumen;GO:0043229//intracellular organelle;GO:0044428//nuclear part;GO:0005654//nucleoplasm;GO:0032991//macromolecular complex;GO:0005575//cellular_component;GO:0044422//organelle part;GO:0031974//…	GO:0003676//nucleic acid binding;GO:1901363//heterocyclic compound binding;GO:0003674//molecular_function;GO:0044822//poly(A) RNA binding;GO:0003729//mRNA binding;GO:0005488//binding;GO:0097159//organic cyclic compound binding;GO:0003723//RNA binding	GO:0071704//organic substance metabolic process;GO:0016043//cellular component organization;GO:0006397//mRNA processing;GO:0044763//single-organism cellular process;GO:0044767//single-organism developmental process;GO:0044699//single-organism process;GO:0071826//ribonucleoprotein complex subunit organization;GO:0016070//RNA metabolic process;GO:0090304//nucleic acid metabolic process;GO:0048856//…
ENSDARG00000003157	52.5	60.5	1.555	1.79	0.203045007	0.497842052	0.738734434	no	nfkbil1	nuclear factor of kappa light polypeptide gene enhancer in B-cells inhibitor-like 1 [Source:ZFIN;Acc:ZDB-GENE-040116-7]	-	-	-	-	GO:0005622//intracellular;GO:0044464//cell part;GO:0043226//organelle;GO:0043231//intracellular membrane-bounded organelle;GO:0005634//nucleus;GO:0005575//cellular_component;GO:0005623//cell;GO:0044424//intracellular part;GO:0043229//intracellular organelle;GO:0043227//membrane-bounded organelle	-	GO:0007154//cell communication;GO:0044699//single-organism process;GO:0044700//single organism signaling;GO:0050789//regulation of biological process;GO:0006950//response to stress;GO:0007165//signal transduction;GO:0009987//cellular process;GO:0002376//immune system process;GO:0008150//biological_process;GO:0050896//response to stimulus;GO:0044763//single-organism cellular process;GO:0023052//si…
ENSDARG00000003165	773	1160.5	47.175	71.955	0.609072422	0.001083092	0.007489916	no	nr2f6b	nuclear receptor subfamily 2, group F, member 6b [Source:ZFIN;Acc:ZDB-GENE-040426-2351]	-	-	-	-	GO:0005623//cell;GO:0043227//membrane-bounded organelle;GO:0044424//intracellular part;GO:0005622//intracellular;GO:0043229//intracellular organelle;GO:0005634//nucleus;GO:0043226//organelle;GO:0005575//cellular_component;GO:0044464//cell part;GO:0043231//intracellular membrane-bounded organelle	GO:0001071//nucleic acid binding transcription factor activity;GO:0003674//molecular_function;GO:0043167//ion binding;GO:0004871//signal transducer activity;GO:1901363//heterocyclic compound binding;GO:0097159//organic cyclic compound binding;GO:0005488//binding;GO:0003700//transcription factor activity, sequence-specific DNA binding;GO:0003676//nucleic acid binding;GO:0003677//DNA binding	GO:0006807//nitrogen compound metabolic process;GO:0044700//single organism signaling;GO:0008152//metabolic process;GO:0009058//biosynthetic process;GO:0044237//cellular metabolic process;GO:0050789//regulation of biological process;GO:0009987//cellular process;GO:0034641//cellular nitrogen compound metabolic process;GO:0044699//single-organism process;GO:0050896//response to stimulus;GO:0023052/…
ENSDARG00000003167	209.37	185.495	14.68	12.545	-0.226739497	0.403170939	0.649819268	no	mlst8	MTOR associated protein, LST8 homolog (S. cerevisiae) [Source:ZFIN;Acc:ZDB-GENE-030131-6176]	Environmental Information Processing	Signal transduction	ko04150//mTOR signaling pathway	K08266	GO:0005623//cell;GO:0032991//macromolecular complex;GO:0005575//cellular_component;GO:0043234//protein complex;GO:0044424//intracellular part;GO:0044464//cell part;GO:0005737//cytoplasm;GO:0005622//intracellular	GO:0003674//molecular_function	GO:0050896//response to stimulus;GO:0044700//single organism signaling;GO:0071840//cellular component organization or biogenesis;GO:0016043//cellular component organization;GO:0044763//single-organism cellular process;GO:0007154//cell communication;GO:0007165//signal transduction;GO:0023052//signaling;GO:0050794//regulation of cellular process;GO:0044699//single-organism process;GO:0008150//biolo…
ENSDARG00000003169	1114.5	838	35.435	24.515	-0.531510287	0.016743821	0.067722012	no	magi1b	membrane associated guanylate kinase, WW and PDZ domain containing 1b [Source:ZFIN;Acc:ZDB-GENE-030131-5110]	Cellular Processes	Cellular commiunity	ko04530//Tight junction	K05631	GO:0005575//cellular_component	GO:0005198//structural molecule activity;GO:0003674//molecular_function	-
ENSDARG00000003175	199.5	259	13.61	15.58	0.195028167	0.078967298	0.216269354	no	stx5al	syntaxin 5A, like [Source:ZFIN;Acc:ZDB-GENE-030131-1825]	Genetic Information Processing	Folding, sorting and degradation	ko04130//SNARE interactions in vesicular transport	K08490	GO:0005737//cytoplasm;GO:0044444//cytoplasmic part;GO:0043227//membrane-bounded organelle;GO:0043231//intracellular membrane-bounded organelle;GO:0044424//intracellular part;GO:0005623//cell;GO:0012505//endomembrane system;GO:0032991//macromolecular complex;GO:0043226//organelle;GO:0043234//protein complex;GO:0005794//Golgi apparatus;GO:0044464//cell part;GO:0005622//intracellular;GO:0043229//int…	GO:0003674//molecular_function	GO:0016043//cellular component organization;GO:0016192//vesicle-mediated transport;GO:0051179//localization;GO:0008150//biological_process;GO:0006810//transport;GO:0061024//membrane organization;GO:0009987//cellular process;GO:0071840//cellular component organization or biogenesis;GO:0051234//establishment of localization
ENSDARG00000003181	131.5	50.5	11.54	4.39	-1.394350379	3.57E-08	8.20E-07	yes	sult1st4	sulfotransferase family 1, cytosolic sulfotransferase 4 [Source:ZFIN;Acc:ZDB-GENE-040426-2054]	-	-	-	-	GO:0005575//cellular_component	GO:0003674//molecular_function	-
ENSDARG00000003189	2126	1998.5	77.08	71.5	-0.10841333	0.617139112	0.831572823	no	psmd1	proteasome 26S subunit, non-ATPase 1 [Source:ZFIN;Acc:ZDB-GENE-040426-810]	Genetic Information Processing	Folding, sorting and degradation	ko03050//Proteasome	K03032	GO:0043226//organelle;GO:0044424//intracellular part;GO:0044444//cytoplasmic part;GO:0032991//macromolecular complex;GO:0043231//intracellular membrane-bounded organelle;GO:0005622//intracellular;GO:0005737//cytoplasm;GO:0043229//intracellular organelle;GO:0043234//protein complex;GO:0005634//nucleus;GO:0044464//cell part;GO:0043227//membrane-bounded organelle;GO:0005623//cell;GO:0005575//cellula…	GO:0098772//molecular function regulator;GO:0003824//catalytic activity;GO:0030234//enzyme regulator activity;GO:0008233//peptidase activity;GO:0016787//hydrolase activity;GO:0003674//molecular_function	GO:0008150//biological_process;GO:0008152//metabolic process;GO:0009056//catabolic process
ENSDARG00000003193	83	110.5	7.565	11.19	0.564798049	0.137010949	0.320918357	no	rassf7b	Ras association (RalGDS/AF-6) domain family (N-terminal) member 7b [Source:ZFIN;Acc:ZDB-GENE-030429-1]	-	-	-	-	GO:0005575//cellular_component	GO:0003674//molecular_function	GO:0006996//organelle organization;GO:0016043//cellular component organization;GO:0008150//biological_process;GO:0071840//cellular component organization or biogenesis;GO:0044700//single organism signaling;GO:0007010//cytoskeleton organization;GO:0051716//cellular response to stimulus;GO:0009987//cellular process;GO:0007154//cell communication;GO:0023052//signaling;GO:0044763//single-organism cel…
ENSDARG00000003197	64.5	76.58	4.61	5.45	0.241489479	0.367149399	0.614423178	no	wdr21	DDB1- and CUL4-associated factor 4 [Danio rerio]	-	-	-	-	-	-	-
ENSDARG00000003200	430.5	334	16.275	12.395	-0.392899272	0.035941682	0.120922593	no	foxm1	forkhead box M1 [Source:ZFIN;Acc:ZDB-GENE-040426-1275]	-	-	-	-	GO:0005623//cell;GO:0044424//intracellular part;GO:0005575//cellular_component;GO:0043231//intracellular membrane-bounded organelle;GO:0044464//cell part;GO:0043227//membrane-bounded organelle;GO:0005622//intracellular;GO:0043229//intracellular organelle;GO:0043226//organelle;GO:0005634//nucleus	GO:0003677//DNA binding;GO:0097159//organic cyclic compound binding;GO:0003700//transcription factor activity, sequence-specific DNA binding;GO:0003674//molecular_function;GO:0001071//nucleic acid binding transcription factor activity;GO:0005488//binding;GO:0003676//nucleic acid binding;GO:1901363//heterocyclic compound binding	GO:0008152//metabolic process;GO:0044763//single-organism cellular process;GO:0044237//cellular metabolic process;GO:0030154//cell differentiation;GO:0044699//single-organism process;GO:0009987//cellular process;GO:0048856//anatomical structure development;GO:0006807//nitrogen compound metabolic process;GO:0048869//cellular developmental process;GO:0034641//cellular nitrogen compound metabolic pr…
ENSDARG00000003203	0.5	1	0.025	0.05	1	1	1	no	rhcga	Rh family, C glycoprotein a [Source:ZFIN;Acc:ZDB-GENE-070424-81]	-	-	-	-	GO:0005623//cell;GO:0005575//cellular_component;GO:0016020//membrane;GO:0005886//plasma membrane;GO:0044464//cell part;GO:0071944//cell periphery	GO:0005215//transporter activity;GO:0022857//transmembrane transporter activity;GO:0003674//molecular_function	GO:0055085//transmembrane transport;GO:0051234//establishment of localization;GO:0006810//transport;GO:0009987//cellular process;GO:0008150//biological_process;GO:0044765//single-organism transport;GO:0051179//localization;GO:0044699//single-organism process;GO:0044763//single-organism cellular process;GO:1902578//single-organism localization
ENSDARG00000003205	237.5	301.5	9.645	12.13	0.330726407	0.079514841	0.217224435	no	ngly1	N-glycanase 1 [Source:ZFIN;Acc:ZDB-GENE-050522-535]	-	-	-	-	GO:0044464//cell part;GO:0005622//intracellular;GO:0044424//intracellular part;GO:0005623//cell;GO:0005737//cytoplasm;GO:0005575//cellular_component	-	GO:0008152//metabolic process;GO:0009056//catabolic process;GO:0008150//biological_process
ENSDARG00000003206	135	164.5	15.445	17.68	0.194978404	0.19096865	0.40144532	no	chchd6a	coiled-coil-helix-coiled-coil-helix domain containing 6a [Source:ZFIN;Acc:ZDB-GENE-040930-2]	-	-	-	-	GO:0043231//intracellular membrane-bounded organelle;GO:0043227//membrane-bounded organelle;GO:0005575//cellular_component;GO:0005622//intracellular;GO:0005737//cytoplasm;GO:0032991//macromolecular complex;GO:0044464//cell part;GO:0005739//mitochondrion;GO:0005623//cell;GO:0044424//intracellular part;GO:0043226//organelle;GO:0044444//cytoplasmic part;GO:0043229//intracellular organelle;GO:0043234…	GO:0003674//molecular_function	GO:0050896//response to stimulus;GO:0016043//cellular component organization;GO:0006950//response to stress;GO:0071840//cellular component organization or biogenesis;GO:0008150//biological_process;GO:0061024//membrane organization;GO:0006996//organelle organization;GO:0009987//cellular process;GO:0007005//mitochondrion organization
ENSDARG00000003207	68	191	9.475	16.055	0.760824817	3.64E-10	1.21E-08	no	mterf3	mitochondrial transcription termination factor 3 [Source:ZFIN;Acc:ZDB-GENE-040718-359]	-	-	-	-	-	GO:0003723//RNA binding;GO:1901363//heterocyclic compound binding;GO:0097159//organic cyclic compound binding;GO:0005488//binding;GO:0019843//rRNA binding;GO:0003677//DNA binding;GO:0003674//molecular_function;GO:0003676//nucleic acid binding	GO:0044085//cellular component biogenesis;GO:0022607//cellular component assembly;GO:0009987//cellular process;GO:0034622//cellular macromolecular complex assembly;GO:0034641//cellular nitrogen compound metabolic process;GO:0071840//cellular component organization or biogenesis;GO:0043933//macromolecular complex subunit organization;GO:0022613//ribonucleoprotein complex biogenesis;GO:0022618//rib…
ENSDARG00000003208	86.5	86.5	2.18	2.155	-0.016640266	0.973588682	1	no	pomk	protein-O-mannose kinase [Source:ZFIN;Acc:ZDB-GENE-041114-119]	-	-	-	-	GO:0043231//intracellular membrane-bounded organelle;GO:0012505//endomembrane system;GO:0043226//organelle;GO:0005575//cellular_component;GO:0043229//intracellular organelle;GO:0005737//cytoplasm;GO:0044424//intracellular part;GO:0005623//cell;GO:0044464//cell part;GO:0043227//membrane-bounded organelle;GO:0044444//cytoplasmic part;GO:0005783//endoplasmic reticulum;GO:0005622//intracellular	GO:0005488//binding;GO:0016772//transferase activity, transferring phosphorus-containing groups;GO:0003824//catalytic activity;GO:0016740//transferase activity;GO:0016301//kinase activity;GO:0043167//ion binding;GO:0003674//molecular_function	GO:0005975//carbohydrate metabolic process;GO:0071704//organic substance metabolic process;GO:0044260//cellular macromolecule metabolic process;GO:0036211//protein modification process;GO:0008150//biological_process;GO:0008152//metabolic process;GO:0044267//cellular protein metabolic process;GO:0019538//protein metabolic process;GO:0044237//cellular metabolic process;GO:0048856//anatomical struct…
ENSDARG00000003210	5	2	0.355	0.19	-0.901819606	0.304803282	0.543665368	no	ANO2 (1 of many)	si:ch73-86n2.1 [Source:ZFIN;Acc:ZDB-GENE-091204-400]	-	-	-	-	GO:0005575//cellular_component	GO:0003674//molecular_function	-
ENSDARG00000003213	1209	2124	39.545	68.915	0.801322739	3.52E-06	5.20E-05	no	naa15a	N(alpha)-acetyltransferase 15, NatA auxiliary subunit a [Source:ZFIN;Acc:ZDB-GENE-030131-2392]	-	-	-	-	GO:0005622//intracellular;GO:0044464//cell part;GO:0005737//cytoplasm;GO:0044424//intracellular part;GO:0005575//cellular_component;GO:0005623//cell	GO:0016746//transferase activity, transferring acyl groups;GO:0016740//transferase activity;GO:0003824//catalytic activity;GO:0003674//molecular_function	GO:0044238//primary metabolic process;GO:0010467//gene expression;GO:0006464//cellular protein modification process;GO:0008150//biological_process;GO:0043412//macromolecule modification;GO:0009987//cellular process;GO:0051604//protein maturation;GO:0019538//protein metabolic process;GO:0044237//cellular metabolic process;GO:0044267//cellular protein metabolic process;GO:0036211//protein modificat…
ENSDARG00000003216	1599	5987.5	112.695	417.015	1.88767577	2.82E-20	4.10E-18	yes	anxa2a	annexin A2a [Source:ZFIN;Acc:ZDB-GENE-030131-4282]	-	-	-	-	-	GO:0043167//ion binding;GO:0005515//protein binding;GO:0008092//cytoskeletal protein binding;GO:0008289//lipid binding;GO:0003674//molecular_function;GO:0098772//molecular function regulator;GO:0005488//binding;GO:0030234//enzyme regulator activity	GO:0008150//biological_process
ENSDARG00000003217	244.595	576.25	6.065	13.625	1.167676679	9.58E-12	4.21E-10	yes	urb2	URB2 ribosome biogenesis 2 homolog (S. cerevisiae) [Source:ZFIN;Acc:ZDB-GENE-030131-2621]	-	-	-	-	GO:0005622//intracellular;GO:0031981//nuclear lumen;GO:0043227//membrane-bounded organelle;GO:0043233//organelle lumen;GO:0043229//intracellular organelle;GO:0044424//intracellular part;GO:0005623//cell;GO:0005730//nucleolus;GO:0031974//membrane-enclosed lumen;GO:0005634//nucleus;GO:0043226//organelle;GO:0043228//non-membrane-bounded organelle;GO:0044428//nuclear part;GO:0044422//organelle part;G…	-	GO:0008150//biological_process;GO:0044085//cellular component biogenesis;GO:0042254//ribosome biogenesis;GO:0022613//ribonucleoprotein complex biogenesis;GO:0071840//cellular component organization or biogenesis
ENSDARG00000003219	97.5	203.5	7.045	14.1	1.001023551	3.13E-06	4.67E-05	yes	bin2a	bridging integrator 2a [Source:ZFIN;Acc:ZDB-GENE-041114-126]	-	-	-	-	GO:0005575//cellular_component;GO:0005623//cell;GO:0044424//intracellular part;GO:0005737//cytoplasm;GO:0005622//intracellular;GO:0044464//cell part	-	-
ENSDARG00000003229	0.5	2	0.025	0.11	2.137503524	0.405759205	0.651877308	no	gdf9	growth differentiation factor 9 [Source:ZFIN;Acc:ZDB-GENE-050221-7]	-	-	-	-	GO:0005575//cellular_component;GO:0005615//extracellular space;GO:0044421//extracellular region part;GO:0005576//extracellular region	GO:0003674//molecular_function	GO:0044237//cellular metabolic process;GO:0009987//cellular process;GO:0000003//reproduction;GO:0044700//single organism signaling;GO:0044767//single-organism developmental process;GO:0050794//regulation of cellular process;GO:0044238//primary metabolic process;GO:0043170//macromolecule metabolic process;GO:0016265//death;GO:0044267//cellular protein metabolic process;GO:0030154//cell differentia…
ENSDARG00000003235	404	502	19.36	23.79	0.297276319	0.124622342	0.299477475	no	nup88	nucleoporin 88 [Source:ZFIN;Acc:ZDB-GENE-050522-297]	Genetic Information Processing	Translation	ko03013//RNA transport	K14318	GO:0005635//nuclear envelope;GO:0031967//organelle envelope;GO:0044464//cell part;GO:0012505//endomembrane system;GO:0005634//nucleus;GO:0005622//intracellular;GO:0005623//cell;GO:0043229//intracellular organelle;GO:0043226//organelle;GO:0043227//membrane-bounded organelle;GO:0043234//protein complex;GO:0031975//envelope;GO:0044428//nuclear part;GO:0044446//intracellular organelle part;GO:0044422…	GO:0005198//structural molecule activity;GO:0003674//molecular_function	GO:0051169//nuclear transport;GO:0044085//cellular component biogenesis;GO:0006913//nucleocytoplasmic transport;GO:0022613//ribonucleoprotein complex biogenesis;GO:0051179//localization;GO:0051641//cellular localization;GO:0046907//intracellular transport;GO:0006810//transport;GO:0042254//ribosome biogenesis;GO:0008150//biological_process;GO:0051234//establishment of localization;GO:0071840//cell…
ENSDARG00000003244	32.5	58	1.295	2.255	0.800175336	0.011112252	0.049365077	no	gbp3	guanylate binding protein 3 [Source:ZFIN;Acc:ZDB-GENE-070912-176]	-	-	-	-	-	GO:0017111//nucleoside-triphosphatase activity;GO:0016462//pyrophosphatase activity;GO:0003674//molecular_function;GO:0005488//binding;GO:0016787//hydrolase activity;GO:0003824//catalytic activity;GO:0016818//hydrolase activity, acting on acid anhydrides, in phosphorus-containing anhydrides;GO:0016817//hydrolase activity, acting on acid anhydrides;GO:0003924//GTPase activity;GO:0043167//ion bindi…	GO:0050896//response to stimulus;GO:0008150//biological_process;GO:0044699//single-organism process;GO:0044763//single-organism cellular process;GO:0002376//immune system process;GO:0016265//death;GO:0006950//response to stress;GO:0009987//cellular process;GO:0008219//cell death
ENSDARG00000003250	15.5	6.5	0.355	0.15	-1.242856524	0.043283314	0.139192099	no	pik3cd	phosphatidylinositol-4,5-bisphosphate 3-kinase, catalytic subunit delta [Source:ZFIN;Acc:ZDB-GENE-040426-1128]	Environmental Information Processing;Metabolism;Organismal Systems;Cellular Processes	Carbohydrate metabolism;Circulatory system;Signal transduction;Immune system;Endocrine system;Cell motility;Cellular commiunity;Cell growth and death	ko04810//Regulation of actin cytoskeleton;ko04510//Focal adhesion;ko04261//Adrenergic signaling in cardiomyocytes;ko04068//FoxO signaling pathway;ko04910//Insulin signaling pathway;ko04630//Jak-STAT signaling pathway;ko04012//ErbB signaling pathway;ko04914//Progesterone-mediated oocyte maturation;ko04070//Phosphatidylinositol signaling system;ko04620//Toll-like receptor signaling pathway;ko04210/…	K00922	GO:0016020//membrane;GO:0005737//cytoplasm;GO:0005886//plasma membrane;GO:0005623//cell;GO:0005575//cellular_component;GO:0005622//intracellular;GO:0044424//intracellular part;GO:0071944//cell periphery;GO:0044464//cell part	GO:0016772//transferase activity, transferring phosphorus-containing groups;GO:0016301//kinase activity;GO:0016740//transferase activity;GO:0003824//catalytic activity;GO:0003674//molecular_function	GO:0051674//localization of cell;GO:0044699//single-organism process;GO:0048856//anatomical structure development;GO:0043412//macromolecule modification;GO:0050896//response to stimulus;GO:0043170//macromolecule metabolic process;GO:0002376//immune system process;GO:0044767//single-organism developmental process;GO:0048870//cell motility;GO:0009653//anatomical structure morphogenesis;GO:0050789//…
ENSDARG00000003251	90	38	4.02	1.695	-1.245910228	2.61E-05	0.000307201	yes	zbtb22b	zinc finger and BTB domain containing 22b [Source:ZFIN;Acc:ZDB-GENE-010110-4]	-	-	-	-	GO:0005575//cellular_component;GO:0043226//organelle;GO:0044424//intracellular part;GO:0005623//cell;GO:0043229//intracellular organelle;GO:0043231//intracellular membrane-bounded organelle;GO:0044464//cell part;GO:0005634//nucleus;GO:0043227//membrane-bounded organelle;GO:0005622//intracellular	GO:0097159//organic cyclic compound binding;GO:0003674//molecular_function;GO:0003676//nucleic acid binding;GO:0003677//DNA binding;GO:0005488//binding;GO:1901363//heterocyclic compound binding	-
ENSDARG00000003257	54.5	39.5	1.97	1.415	-0.477393577	0.13124402	0.31074131	no	zgc:101559	zgc:101559 [Source:ZFIN;Acc:ZDB-GENE-041114-122]	-	-	-	-	-	GO:0016818//hydrolase activity, acting on acid anhydrides, in phosphorus-containing anhydrides;GO:0005488//binding;GO:0003824//catalytic activity;GO:0016462//pyrophosphatase activity;GO:0017111//nucleoside-triphosphatase activity;GO:0043167//ion binding;GO:0003924//GTPase activity;GO:0003674//molecular_function;GO:0016787//hydrolase activity;GO:0016817//hydrolase activity, acting on acid anhydrid…	GO:0009987//cellular process;GO:0006914//autophagy;GO:0016043//cellular component organization;GO:0071840//cellular component organization or biogenesis;GO:0044085//cellular component biogenesis;GO:0022607//cellular component assembly;GO:0008150//biological_process;GO:0008152//metabolic process;GO:0009056//catabolic process
ENSDARG00000003259	0.5	0.5	0.03	0.03	0	1	1	no	loxa	lysyl oxidase a [Source:ZFIN;Acc:ZDB-GENE-040426-2398]	-	-	-	-	GO:0005575//cellular_component	GO:0003674//molecular_function;GO:0003824//catalytic activity;GO:0016491//oxidoreductase activity;GO:0005488//binding;GO:0043167//ion binding	GO:0044699//single-organism process;GO:0032502//developmental process;GO:0048856//anatomical structure development;GO:0048869//cellular developmental process;GO:0009987//cellular process;GO:0044763//single-organism cellular process;GO:0030154//cell differentiation;GO:0044767//single-organism developmental process;GO:0008150//biological_process
ENSDARG00000003269	412	490.5	20.14	23.54	0.225050637	0.175704679	0.379832972	no	clcn3	chloride channel 3 [Source:ZFIN;Acc:ZDB-GENE-030131-1699]	-	-	-	-	GO:0005575//cellular_component	GO:0022857//transmembrane transporter activity;GO:0003674//molecular_function;GO:0005215//transporter activity	GO:0044765//single-organism transport;GO:0008150//biological_process;GO:0051179//localization;GO:1902578//single-organism localization;GO:0044699//single-organism process;GO:0009987//cellular process;GO:0051234//establishment of localization;GO:0006810//transport;GO:0055085//transmembrane transport;GO:0044763//single-organism cellular process
ENSDARG00000003270	82	187.5	7.88	15.315	0.958677832	1.17E-07	2.39E-06	no	dhps	deoxyhypusine synthase [Source:ZFIN;Acc:ZDB-GENE-040426-2001]	-	-	-	-	GO:0005575//cellular_component;GO:0005737//cytoplasm;GO:0005623//cell;GO:0044464//cell part;GO:0005622//intracellular;GO:0044424//intracellular part	GO:0003824//catalytic activity;GO:0003674//molecular_function;GO:0016740//transferase activity;GO:0016765//transferase activity, transferring alkyl or aryl (other than methyl) groups	GO:0048856//anatomical structure development;GO:0044699//single-organism process;GO:0019538//protein metabolic process;GO:0009058//biosynthetic process;GO:0044767//single-organism developmental process;GO:0051604//protein maturation;GO:0044237//cellular metabolic process;GO:0071704//organic substance metabolic process;GO:0008150//biological_process;GO:0044238//primary metabolic process;GO:0032502…
ENSDARG00000003281	116.5	164	6.43	8.99	0.483502378	0.023665069	0.088623309	no	pik3ip1	phosphoinositide-3-kinase interacting protein 1 [Source:ZFIN;Acc:ZDB-GENE-031030-14]	-	-	-	-	GO:0005575//cellular_component	-	-
ENSDARG00000003287	146	404	8.125	22.37	1.461125538	3.25E-14	2.11E-12	yes	wdr12	WD repeat domain 12 [Source:ZFIN;Acc:ZDB-GENE-030131-371]	-	-	-	-	GO:0005575//cellular_component;GO:0070013//intracellular organelle lumen;GO:0044424//intracellular part;GO:0031981//nuclear lumen;GO:0043226//organelle;GO:0044422//organelle part;GO:0032991//macromolecular complex;GO:0043234//protein complex;GO:0043233//organelle lumen;GO:0005623//cell;GO:0044464//cell part;GO:0044446//intracellular organelle part;GO:0043231//intracellular membrane-bounded organe…	-	GO:0034641//cellular nitrogen compound metabolic process;GO:0044085//cellular component biogenesis;GO:0006807//nitrogen compound metabolic process;GO:0008283//cell proliferation;GO:0008152//metabolic process;GO:0009987//cellular process;GO:0022613//ribonucleoprotein complex biogenesis;GO:0044699//single-organism process;GO:0044237//cellular metabolic process;GO:0008150//biological_process;GO:0071…
ENSDARG00000003290	33.5	10	2.595	0.615	-2.077076223	5.25E-05	0.000571211	yes	dab1b	Dab, reelin signal transducer, homolog 1b (Drosophila) [Source:ZFIN;Acc:ZDB-GENE-060421-7958]	-	-	-	-	GO:0005575//cellular_component	GO:0003674//molecular_function	-
ENSDARG00000003293	563.5	410.5	41.25	30.34	-0.443173034	0.011451675	0.050569417	no	sox9a	SRY (sex determining region Y)-box 9a [Source:ZFIN;Acc:ZDB-GENE-001103-1]	-	-	-	-	GO:0043231//intracellular membrane-bounded organelle;GO:0005623//cell;GO:0044424//intracellular part;GO:0044464//cell part;GO:0005622//intracellular;GO:0005737//cytoplasm;GO:0005634//nucleus;GO:0043226//organelle;GO:0043229//intracellular organelle;GO:0005575//cellular_component;GO:0043227//membrane-bounded organelle	GO:0003674//molecular_function;GO:0001071//nucleic acid binding transcription factor activity;GO:0003676//nucleic acid binding;GO:0005488//binding;GO:0097159//organic cyclic compound binding;GO:0003677//DNA binding;GO:1901363//heterocyclic compound binding;GO:0003700//transcription factor activity, sequence-specific DNA binding	GO:0044699//single-organism process;GO:0048646//anatomical structure formation involved in morphogenesis;GO:0009653//anatomical structure morphogenesis;GO:0044767//single-organism developmental process;GO:0006807//nitrogen compound metabolic process;GO:0007275//multicellular organism development;GO:0008152//metabolic process;GO:0044237//cellular metabolic process;GO:0008150//biological_process;GO…
ENSDARG00000003303	0	2.5	0.001	0.295	8.204571144	0.087350909	0.232432636	no	stc1	stanniocalcin 1 [Source:ZFIN;Acc:ZDB-GENE-060825-79]	-	-	-	-	GO:0005576//extracellular region;GO:0005575//cellular_component	GO:0003674//molecular_function	GO:0050789//regulation of biological process;GO:0044699//single-organism process;GO:0008150//biological_process;GO:0044763//single-organism cellular process;GO:0044700//single organism signaling;GO:0050896//response to stimulus;GO:0051716//cellular response to stimulus;GO:0009987//cellular process;GO:0023052//signaling;GO:0007154//cell communication;GO:0050794//regulation of cellular process;GO:0…
ENSDARG00000003307	169.5	205	10.605	14.175	0.418604114	0.190244271	0.400142523	no	stx16	syntaxin 16 [Source:ZFIN;Acc:ZDB-GENE-060810-113]	Genetic Information Processing	Folding, sorting and degradation	ko04130//SNARE interactions in vesicular transport	K08489	GO:0005622//intracellular;GO:0032991//macromolecular complex;GO:0005737//cytoplasm;GO:0005623//cell;GO:0005575//cellular_component;GO:0043234//protein complex;GO:0044424//intracellular part;GO:0044464//cell part	GO:0003674//molecular_function	GO:0048856//anatomical structure development;GO:0071840//cellular component organization or biogenesis;GO:0016043//cellular component organization;GO:0061024//membrane organization;GO:0051179//localization;GO:0032502//developmental process;GO:0006810//transport;GO:0009987//cellular process;GO:0051234//establishment of localization;GO:0008150//biological_process;GO:0016192//vesicle-mediated transp…
ENSDARG00000003308	910	954	71.35	74.255	0.057574744	0.751427489	0.926315142	no	emc2	ER membrane protein complex subunit 2 [Source:ZFIN;Acc:ZDB-GENE-040625-82]	-	-	-	-	GO:0005575//cellular_component;GO:0044444//cytoplasmic part;GO:0043231//intracellular membrane-bounded organelle;GO:0044464//cell part;GO:0005737//cytoplasm;GO:0043226//organelle;GO:0005783//endoplasmic reticulum;GO:0005623//cell;GO:0043229//intracellular organelle;GO:0005634//nucleus;GO:0032991//macromolecular complex;GO:0044424//intracellular part;GO:0043227//membrane-bounded organelle;GO:00056…	-	GO:0009987//cellular process;GO:0006457//protein folding;GO:0008150//biological_process
ENSDARG00000003311	202	130.5	9.23	5.95	-0.633440979	0.004382889	0.023381863	no	pank2	pantothenate kinase 2 [Source:ZFIN;Acc:ZDB-GENE-070112-1952]	Metabolism	Metabolism of cofactors and vitamins	ko00770//Pantothenate and CoA biosynthesis	K09680	-	GO:0016740//transferase activity;GO:0016772//transferase activity, transferring phosphorus-containing groups;GO:0043167//ion binding;GO:0016301//kinase activity;GO:0003824//catalytic activity;GO:0003674//molecular_function;GO:0005488//binding	GO:0008152//metabolic process;GO:0009987//cellular process;GO:0034641//cellular nitrogen compound metabolic process;GO:0051186//cofactor metabolic process;GO:0044710//single-organism metabolic process;GO:0008150//biological_process;GO:0048856//anatomical structure development;GO:0044281//small molecule metabolic process;GO:0044699//single-organism process;GO:0044237//cellular metabolic process;GO…
ENSDARG00000003313	42	79.5	1.875	3.565	0.927011481	0.00152016	0.009914747	no	eps8l1b	si:ch73-70c5.1 [Source:ZFIN;Acc:ZDB-GENE-050506-143]	-	-	-	-	GO:0005575//cellular_component	GO:0003674//molecular_function	GO:0008150//biological_process
ENSDARG00000003320	312	303.5	9.2	8.815	-0.061673292	0.775912956	0.94257321	no	fam91a1	family with sequence similarity 91, member A1 [Source:ZFIN;Acc:ZDB-GENE-040426-1187]	-	-	-	-	GO:0043226//organelle;GO:0005575//cellular_component;GO:0005737//cytoplasm;GO:0043231//intracellular membrane-bounded organelle;GO:0044424//intracellular part;GO:0012505//endomembrane system;GO:0043227//membrane-bounded organelle;GO:0005794//Golgi apparatus;GO:0044444//cytoplasmic part;GO:0005623//cell;GO:0005622//intracellular;GO:0043229//intracellular organelle;GO:0044464//cell part	-	-
ENSDARG00000003326	0.5	1	0.03	0.06	1	1	1	no	cacng5a	calcium channel, voltage-dependent, gamma subunit 5a [Source:ZFIN;Acc:ZDB-GENE-120104-4]	Environmental Information Processing;Organismal Systems	Signal transduction;Circulatory system	ko04010//MAPK signaling pathway;ko04261//Adrenergic signaling in cardiomyocytes;ko04260//Cardiac muscle contraction	K04870	GO:0071944//cell periphery;GO:0016020//membrane;GO:0005575//cellular_component;GO:0005886//plasma membrane;GO:0005623//cell;GO:0044464//cell part	GO:0022857//transmembrane transporter activity;GO:0005215//transporter activity;GO:0003674//molecular_function	GO:0032501//multicellular organismal process;GO:0008150//biological_process;GO:0044700//single organism signaling;GO:1902578//single-organism localization;GO:0044765//single-organism transport;GO:0007165//signal transduction;GO:0051716//cellular response to stimulus;GO:0044763//single-organism cellular process;GO:0051234//establishment of localization;GO:0050789//regulation of biological process;…
ENSDARG00000003328	185	144.5	5.455	3.845	-0.504595598	0.085871185	0.229961992	no	slf2	PREDICTED: SMC5-SMC6 complex localization factor protein 2 isoform X2 [Danio rerio]	-	-	-	-	-	-	-
ENSDARG00000003344	8	11	0.26	0.365	0.489384841	0.600167601	0.817932955	no	trpc2b	transient receptor potential cation channel, subfamily C, member 2b [Source:ZFIN;Acc:ZDB-GENE-050712-3]	-	-	-	-	GO:0005623//cell;GO:0071944//cell periphery;GO:0005886//plasma membrane;GO:0005575//cellular_component;GO:0016020//membrane;GO:0044464//cell part	GO:0005215//transporter activity;GO:0022857//transmembrane transporter activity;GO:0003674//molecular_function	GO:0044699//single-organism process;GO:0044763//single-organism cellular process;GO:0008150//biological_process;GO:0006810//transport;GO:0044765//single-organism transport;GO:0055085//transmembrane transport;GO:0042592//homeostatic process;GO:1902578//single-organism localization;GO:0051234//establishment of localization;GO:0009987//cellular process;GO:0051179//localization;GO:0065008//regulation…
ENSDARG00000003373	179	143.5	22.61	17.925	-0.334987873	0.141977267	0.329267129	no	commd2	COMM domain containing 2 [Source:ZFIN;Acc:ZDB-GENE-040718-118]	-	-	-	-	GO:0005575//cellular_component	GO:0003674//molecular_function	GO:0008150//biological_process
ENSDARG00000003375	163	197.5	10.66	12.775	0.261115853	0.245458502	0.47785797	no	gng12a	guanine nucleotide binding protein (G protein), gamma 12a [Source:ZFIN;Acc:ZDB-GENE-040426-2555]	Cellular Processes;Environmental Information Processing	Signal transduction;Cell motility	ko04010//MAPK signaling pathway;ko04810//Regulation of actin cytoskeleton	K04347	GO:0005623//cell;GO:0071944//cell periphery;GO:0043234//protein complex;GO:0044464//cell part;GO:0032991//macromolecular complex;GO:0016020//membrane;GO:0005575//cellular_component;GO:0005886//plasma membrane;GO:0005622//intracellular	GO:0003674//molecular_function;GO:0004871//signal transducer activity	GO:0008150//biological_process;GO:0050794//regulation of cellular process;GO:0044763//single-organism cellular process;GO:0044700//single organism signaling;GO:0044699//single-organism process;GO:0007165//signal transduction;GO:0065007//biological regulation;GO:0050789//regulation of biological process;GO:0007154//cell communication;GO:0051716//cellular response to stimulus;GO:0023052//signaling;…
ENSDARG00000003380	0	0	0.001	0.001	0	1	1	notest	si:dkey-275b16.2	si:dkey-275b16.2 [Source:ZFIN;Acc:ZDB-GENE-090312-204]	Cellular Processes	Transport and catabolism	ko04146//Peroxisome	K00308	-	GO:0016491//oxidoreductase activity;GO:0003674//molecular_function;GO:0003824//catalytic activity	GO:0008150//biological_process
ENSDARG00000003381	132	74	4.915	2.755	-0.835139098	0.001872264	0.011692391	no	si:ch211-266g18.6	si:ch211-266g18.6 [Source:ZFIN;Acc:ZDB-GENE-131121-599]	-	-	-	-	GO:0043226//organelle;GO:0044424//intracellular part;GO:0043229//intracellular organelle;GO:0005623//cell;GO:0044464//cell part;GO:0005886//plasma membrane;GO:0044444//cytoplasmic part;GO:0005737//cytoplasm;GO:0031410//cytoplasmic vesicle;GO:0071944//cell periphery;GO:0005575//cellular_component;GO:0005622//intracellular;GO:0031982//vesicle;GO:0016020//membrane	GO:0003674//molecular_function;GO:0005488//binding;GO:0005515//protein binding;GO:0008289//lipid binding;GO:0043167//ion binding;GO:0019899//enzyme binding	GO:0044699//single-organism process;GO:0007267//cell-cell signaling;GO:0007154//cell communication;GO:0008150//biological_process;GO:0044763//single-organism cellular process;GO:0006810//transport;GO:0051234//establishment of localization;GO:0071840//cellular component organization or biogenesis;GO:0009987//cellular process;GO:0061024//membrane organization;GO:0044700//single organism signaling;G…
ENSDARG00000003382	396.5	380.5	23.67	22.5	-0.073134705	0.689653507	0.882548785	no	cwc25	pre-mRNA-splicing factor CWC25 homolog [Danio rerio]	-	-	-	-	-	-	-
ENSDARG00000003383	129.5	109.5	9.42	9.54	0.018262206	0.26602799	0.503133221	no	asb8	ankyrin repeat and SOCS box containing 8 [Source:ZFIN;Acc:ZDB-GENE-030131-5411]	-	-	-	-	GO:0005575//cellular_component;GO:0044464//cell part;GO:0005623//cell;GO:0005622//intracellular	-	GO:0050896//response to stimulus;GO:0050794//regulation of cellular process;GO:0044237//cellular metabolic process;GO:0044699//single-organism process;GO:0008150//biological_process;GO:0043170//macromolecule metabolic process;GO:0009987//cellular process;GO:0006464//cellular protein modification process;GO:0043412//macromolecule modification;GO:0071704//organic substance metabolic process;GO:0036…
ENSDARG00000003395	173.04	94.02	4.47	2.73	-0.71137388	0.000344285	0.002867375	no	col4a3	collagen, type IV, alpha 3 [Source:ZFIN;Acc:ZDB-GENE-070802-4]	-	-	-	-	GO:0005576//extracellular region;GO:0031012//extracellular matrix;GO:0044421//extracellular region part;GO:0043234//protein complex;GO:0032991//macromolecular complex;GO:0005575//cellular_component;GO:0005578//proteinaceous extracellular matrix	GO:0005198//structural molecule activity;GO:0003674//molecular_function	-
ENSDARG00000003398	418.5	361	9.415	8.045	-0.226868674	0.204918906	0.421389524	no	rbpja	recombination signal binding protein for immunoglobulin kappa J region a [Source:ZFIN;Acc:ZDB-GENE-031117-1]	Environmental Information Processing	Signal transduction	ko04330//Notch signaling pathway	K06053	GO:0043231//intracellular membrane-bounded organelle;GO:0005634//nucleus;GO:0005575//cellular_component;GO:0043226//organelle;GO:0043227//membrane-bounded organelle;GO:0005623//cell;GO:0005622//intracellular;GO:0044424//intracellular part;GO:0043229//intracellular organelle;GO:0044464//cell part	GO:0003676//nucleic acid binding;GO:0005488//binding;GO:0003674//molecular_function;GO:0001071//nucleic acid binding transcription factor activity;GO:1901363//heterocyclic compound binding;GO:0097159//organic cyclic compound binding;GO:0003700//transcription factor activity, sequence-specific DNA binding;GO:0003677//DNA binding	GO:0044237//cellular metabolic process;GO:0009653//anatomical structure morphogenesis;GO:0050794//regulation of cellular process;GO:0007154//cell communication;GO:0034641//cellular nitrogen compound metabolic process;GO:0008152//metabolic process;GO:0048646//anatomical structure formation involved in morphogenesis;GO:0065007//biological regulation;GO:0032502//developmental process;GO:0050896//res…
ENSDARG00000003399	39	100	2.57	6.245	1.280933212	8.07E-07	1.38E-05	yes	fgf8a	fibroblast growth factor 8a [Source:ZFIN;Acc:ZDB-GENE-990415-72]	Environmental Information Processing;Cellular Processes	Signal transduction;Cell motility	ko04010//MAPK signaling pathway;ko04810//Regulation of actin cytoskeleton	K04358	GO:0005575//cellular_component;GO:0005773//vacuole;GO:0044424//intracellular part;GO:0005622//intracellular;GO:0005576//extracellular region;GO:0044444//cytoplasmic part;GO:0005737//cytoplasm;GO:0043229//intracellular organelle;GO:0044464//cell part;GO:0043226//organelle;GO:0000323//lytic vacuole;GO:0043227//membrane-bounded organelle;GO:0044421//extracellular region part;GO:0005764//lysosome;GO:…	GO:0003674//molecular_function	GO:0009987//cellular process;GO:0008150//biological_process;GO:0007275//multicellular organism development;GO:0007154//cell communication;GO:0007267//cell-cell signaling;GO:0050789//regulation of biological process;GO:0022607//cellular component assembly;GO:0071840//cellular component organization or biogenesis;GO:0048646//anatomical structure formation involved in morphogenesis;GO:0006928//movem…
ENSDARG00000003403	157.5	171.5	2.265	2.455	0.116211974	0.618548491	0.832801028	no	tenm1	teneurin transmembrane protein 1 [Source:ZFIN;Acc:ZDB-GENE-060531-26]	-	-	-	-	GO:0044464//cell part;GO:0005886//plasma membrane;GO:0005575//cellular_component;GO:0016020//membrane;GO:0071944//cell periphery;GO:0005623//cell	GO:0003674//molecular_function	GO:0007154//cell communication;GO:0032502//developmental process;GO:0065007//biological regulation;GO:0009987//cellular process;GO:0044699//single-organism process;GO:0048856//anatomical structure development;GO:0044767//single-organism developmental process;GO:0009653//anatomical structure morphogenesis;GO:0050789//regulation of biological process;GO:0030154//cell differentiation;GO:0051716//cel…
ENSDARG00000003411	167.5	156	10.915	10.12	-0.10910284	0.60598196	0.822780398	no	foxa2	forkhead box A2 [Source:ZFIN;Acc:ZDB-GENE-980526-404]	-	-	-	-	GO:0044424//intracellular part;GO:0005623//cell;GO:0005575//cellular_component;GO:0005634//nucleus;GO:0043229//intracellular organelle;GO:0043231//intracellular membrane-bounded organelle;GO:0043226//organelle;GO:0044464//cell part;GO:0043227//membrane-bounded organelle;GO:0005622//intracellular	GO:0003676//nucleic acid binding;GO:1901363//heterocyclic compound binding;GO:0003674//molecular_function;GO:0008134//transcription factor binding;GO:0003700//transcription factor activity, sequence-specific DNA binding;GO:0001071//nucleic acid binding transcription factor activity;GO:0097159//organic cyclic compound binding;GO:0003677//DNA binding;GO:0005488//binding;GO:0005515//protein binding	GO:0009987//cellular process;GO:0008150//biological_process;GO:0044237//cellular metabolic process;GO:0008152//metabolic process;GO:0006807//nitrogen compound metabolic process;GO:0034641//cellular nitrogen compound metabolic process;GO:0009058//biosynthetic process
ENSDARG00000003414	13	19	1.35	1.98	0.552541023	0.293786201	0.534315503	no	capslb	calcyphosine-like b [Source:ZFIN;Acc:ZDB-GENE-050417-298]	-	-	-	-	GO:0005575//cellular_component	GO:0003674//molecular_function;GO:0005488//binding;GO:0043167//ion binding	-
ENSDARG00000003420	45	66	3.31	4.97	0.586414635	0.053722663	0.16346194	no	chrna5	cholinergic receptor, nicotinic, alpha 5 [Source:ZFIN;Acc:ZDB-GENE-050417-440]	Environmental Information Processing	Signaling molecules and interaction	ko04080//Neuroactive ligand-receptor interaction	K04807	GO:0005886//plasma membrane;GO:0016020//membrane;GO:0071944//cell periphery;GO:0005623//cell;GO:0005575//cellular_component;GO:0044464//cell part	GO:0005488//binding;GO:0022857//transmembrane transporter activity;GO:0005215//transporter activity;GO:0003674//molecular_function;GO:0004871//signal transducer activity;GO:0043167//ion binding	GO:0051716//cellular response to stimulus;GO:0051179//localization;GO:0051234//establishment of localization;GO:0007165//signal transduction;GO:0065007//biological regulation;GO:0050896//response to stimulus;GO:1902578//single-organism localization;GO:0007154//cell communication;GO:0023052//signaling;GO:0055085//transmembrane transport;GO:0006810//transport;GO:0007267//cell-cell signaling;GO:0050…
ENSDARG00000003421	127.5	196.5	6.425	10.795	0.748594884	0.004676184	0.024599689	no	igf2bp2a	insulin-like growth factor 2 mRNA binding protein 2a [Source:ZFIN;Acc:ZDB-GENE-070912-44]	-	-	-	-	-	GO:0003674//molecular_function;GO:0003729//mRNA binding;GO:0003676//nucleic acid binding;GO:0044822//poly(A) RNA binding;GO:0003723//RNA binding;GO:0005488//binding;GO:0097159//organic cyclic compound binding;GO:1901363//heterocyclic compound binding	-
ENSDARG00000003429	1636.3	1580.725	140.57	135.355	-0.05454055	0.826762539	0.977586522	no	hnrnpdl	heterogeneous nuclear ribonucleoprotein D-like [Source:ZFIN;Acc:ZDB-GENE-040426-2717]	-	-	-	-	GO:0005623//cell;GO:0005622//intracellular;GO:0044464//cell part;GO:0005575//cellular_component	GO:0097159//organic cyclic compound binding;GO:0003674//molecular_function;GO:0003723//RNA binding;GO:1901363//heterocyclic compound binding;GO:0005488//binding;GO:0003676//nucleic acid binding	-
ENSDARG00000003444	74.5	75	6.62	6.63	0.002177653	1	1	no	dhrs7	dehydrogenase/reductase (SDR family) member 7 [Source:ZFIN;Acc:ZDB-GENE-060825-21]	-	-	-	-	GO:0005575//cellular_component	GO:0016491//oxidoreductase activity;GO:0003824//catalytic activity;GO:0003674//molecular_function	GO:0008150//biological_process
ENSDARG00000003446	175	288.5	8.39	13.74	0.711639288	0.000256035	0.002233739	no	ippk	inositol 1,3,4,5,6-pentakisphosphate 2-kinase [Source:ZFIN;Acc:ZDB-GENE-050327-41]	Environmental Information Processing;Metabolism	Carbohydrate metabolism;Signal transduction	ko04070//Phosphatidylinositol signaling system;ko00562//Inositol phosphate metabolism	K10572	GO:0043231//intracellular membrane-bounded organelle;GO:0005929//cilium;GO:0005622//intracellular;GO:0044422//organelle part;GO:0015630//microtubule cytoskeleton;GO:0044430//cytoskeletal part;GO:0043229//intracellular organelle;GO:0005634//nucleus;GO:0044424//intracellular part;GO:0043232//intracellular non-membrane-bounded organelle;GO:0005856//cytoskeleton;GO:0043228//non-membrane-bounded organ…	GO:0003824//catalytic activity;GO:0016740//transferase activity;GO:0043167//ion binding;GO:0005488//binding;GO:0003674//molecular_function;GO:0016772//transferase activity, transferring phosphorus-containing groups;GO:0016301//kinase activity	GO:0044710//single-organism metabolic process;GO:0044238//primary metabolic process;GO:0043473//pigmentation;GO:0006810//transport;GO:0048856//anatomical structure development;GO:0071704//organic substance metabolic process;GO:0051234//establishment of localization;GO:0008150//biological_process;GO:0044699//single-organism process;GO:0008152//metabolic process;GO:0005975//carbohydrate metabolic p…
ENSDARG00000003449	44	72	1.77	3.015	0.768408642	0.01585962	0.065147562	no	pde10a	phosphodiesterase 10A [Source:ZFIN;Acc:ZDB-GENE-040426-1115]	Metabolism	Nucleotide metabolism	ko00230//Purine metabolism	K18438	-	GO:0003674//molecular_function;GO:0005488//binding;GO:0043167//ion binding	GO:0009987//cellular process;GO:0050896//response to stimulus;GO:0023052//signaling;GO:0007165//signal transduction;GO:0044700//single organism signaling;GO:0044763//single-organism cellular process;GO:0007154//cell communication;GO:0065007//biological regulation;GO:0050789//regulation of biological process;GO:0050794//regulation of cellular process;GO:0051716//cellular response to stimulus;GO:00…
ENSDARG00000003462	76.5	111	6.16	8.81	0.516211668	0.119341877	0.290875226	no	fech	ferrochelatase [Source:ZFIN;Acc:ZDB-GENE-000928-1]	Metabolism	Metabolism of cofactors and vitamins	ko00860//Porphyrin and chlorophyll metabolism	K01772	GO:0043231//intracellular membrane-bounded organelle;GO:0044444//cytoplasmic part;GO:0005575//cellular_component;GO:0005623//cell;GO:0044424//intracellular part;GO:0044464//cell part;GO:0043226//organelle;GO:0005622//intracellular;GO:0043229//intracellular organelle;GO:0043227//membrane-bounded organelle;GO:0005739//mitochondrion;GO:0005737//cytoplasm	GO:0016829//lyase activity;GO:0003674//molecular_function;GO:0003824//catalytic activity	GO:0048869//cellular developmental process;GO:0044763//single-organism cellular process;GO:0048856//anatomical structure development;GO:0065008//regulation of biological quality;GO:0044237//cellular metabolic process;GO:0044699//single-organism process;GO:0051186//cofactor metabolic process;GO:0009987//cellular process;GO:0044767//single-organism developmental process;GO:0008150//biological_proce…
ENSDARG00000003469	2199	449	129.11	26.105	-2.306202683	4.90E-33	3.12E-30	yes	neurod4	neuronal differentiation 4 [Source:ZFIN;Acc:ZDB-GENE-030730-1]	-	-	-	-	GO:0043231//intracellular membrane-bounded organelle;GO:0005575//cellular_component;GO:0005622//intracellular;GO:0043229//intracellular organelle;GO:0044424//intracellular part;GO:0005623//cell;GO:0043226//organelle;GO:0044464//cell part;GO:0005634//nucleus;GO:0043227//membrane-bounded organelle	GO:0003676//nucleic acid binding;GO:1901363//heterocyclic compound binding;GO:0003677//DNA binding;GO:0003674//molecular_function;GO:0005488//binding;GO:0097159//organic cyclic compound binding	GO:0008150//biological_process;GO:0048856//anatomical structure development;GO:0030154//cell differentiation;GO:0048869//cellular developmental process;GO:0044237//cellular metabolic process;GO:0007275//multicellular organism development;GO:0044767//single-organism developmental process;GO:0044763//single-organism cellular process;GO:0008152//metabolic process;GO:0044707//single-multicellular org…
ENSDARG00000003475	14	18	1.57	2.01	0.356430942	0.470694954	0.714192937	no	sult1st5	sulfotransferase family 1, cytosolic sulfotransferase 5 [Source:ZFIN;Acc:ZDB-GENE-050809-2]	-	-	-	-	-	GO:0003674//molecular_function	GO:0008150//biological_process
ENSDARG00000003486	2154.5	1569.5	54.78	39.565	-0.469424509	0.00689693	0.033799673	no	ppp1caa	protein phosphatase 1, catalytic subunit, alpha isozyme a [Source:ZFIN;Acc:ZDB-GENE-040516-3]	Genetic Information Processing;Organismal Systems;Cellular Processes	Circulatory system;Translation;Cell motility;Endocrine system;Cell growth and death;Cellular commiunity	ko04810//Regulation of actin cytoskeleton;ko04510//Focal adhesion;ko04261//Adrenergic signaling in cardiomyocytes;ko04910//Insulin signaling pathway;ko04270//Vascular smooth muscle contraction;ko04114//Oocyte meiosis;ko03015//mRNA surveillance pathway	K06269	GO:0005737//cytoplasm;GO:0044424//intracellular part;GO:0005623//cell;GO:0005622//intracellular;GO:0005575//cellular_component;GO:0044464//cell part	GO:0003824//catalytic activity;GO:0016791//phosphatase activity;GO:0016787//hydrolase activity;GO:0043167//ion binding;GO:0042578//phosphoric ester hydrolase activity;GO:0016788//hydrolase activity, acting on ester bonds;GO:0005488//binding;GO:0003674//molecular_function	GO:0048856//anatomical structure development;GO:0032502//developmental process;GO:0008152//metabolic process;GO:0043170//macromolecule metabolic process;GO:0006464//cellular protein modification process;GO:0044237//cellular metabolic process;GO:0019538//protein metabolic process;GO:0044238//primary metabolic process;GO:0036211//protein modification process;GO:0044267//cellular protein metabolic p…
ENSDARG00000003487	739	950	27.12	34.585	0.350789278	0.046859336	0.147530796	no	nup93	nucleoporin 93 [Source:ZFIN;Acc:ZDB-GENE-990415-46]	Genetic Information Processing	Translation	ko03013//RNA transport	K14309	GO:0032991//macromolecular complex;GO:0043226//organelle;GO:0005575//cellular_component;GO:0031975//envelope;GO:0044422//organelle part;GO:0043229//intracellular organelle;GO:0044464//cell part;GO:0043227//membrane-bounded organelle;GO:0005634//nucleus;GO:0043231//intracellular membrane-bounded organelle;GO:0044428//nuclear part;GO:0012505//endomembrane system;GO:0005635//nuclear envelope;GO:0005…	GO:0003674//molecular_function;GO:0005198//structural molecule activity	GO:0006810//transport;GO:0051179//localization;GO:0016482//cytoplasmic transport;GO:0051649//establishment of localization in cell;GO:0051641//cellular localization;GO:0046907//intracellular transport;GO:0008150//biological_process;GO:0006913//nucleocytoplasmic transport;GO:0051169//nuclear transport;GO:0051234//establishment of localization
ENSDARG00000003495	606	404.5	15.115	8.4	-0.847519746	0.000848642	0.006134871	no	madd	MAP-kinase activating death domain [Source:ZFIN;Acc:ZDB-GENE-030131-8076]	-	-	-	-	-	GO:0005488//binding;GO:0005515//protein binding;GO:0003674//molecular_function;GO:0019899//enzyme binding	GO:0009987//cellular process;GO:0008150//biological_process;GO:0016265//death;GO:0044763//single-organism cellular process;GO:0008219//cell death;GO:0044699//single-organism process
ENSDARG00000003512	228	245	5.195	5.595	0.107014382	0.645966115	0.84969994	no	anks1b	ankyrin repeat and sterile alpha motif domain containing 1B [Source:ZFIN;Acc:ZDB-GENE-041210-349]	-	-	-	-	GO:0044424//intracellular part;GO:0044464//cell part;GO:0005622//intracellular;GO:0005623//cell;GO:0005575//cellular_component;GO:0005737//cytoplasm	-	GO:0008150//biological_process
ENSDARG00000003517	107.5	126.5	11.67	13.45	0.204801612	0.466972876	0.710853357	no	impa1	inositol monophosphatase 1 [Source:ZFIN;Acc:ZDB-GENE-040718-245]	Environmental Information Processing;Metabolism	Signal transduction;Carbohydrate metabolism	ko04070//Phosphatidylinositol signaling system;ko00562//Inositol phosphate metabolism	K01092	-	GO:0016791//phosphatase activity;GO:0016787//hydrolase activity;GO:0016788//hydrolase activity, acting on ester bonds;GO:0043167//ion binding;GO:0005488//binding;GO:0003674//molecular_function;GO:0042578//phosphoric ester hydrolase activity;GO:0003824//catalytic activity	GO:0044763//single-organism cellular process;GO:0044710//single-organism metabolic process;GO:0008152//metabolic process;GO:0008150//biological_process;GO:0044281//small molecule metabolic process;GO:0009056//catabolic process;GO:0044699//single-organism process;GO:0009987//cellular process;GO:0050896//response to stimulus;GO:0051716//cellular response to stimulus;GO:0006629//lipid metabolic proc…
ENSDARG00000003519	24.5	46	1.785	2.43	0.44503224	0.012356601	0.053666894	no	aprt	adenine phosphoribosyltransferase [Source:ZFIN;Acc:ZDB-GENE-040426-1492]	Metabolism	Nucleotide metabolism	ko00230//Purine metabolism	K00759	GO:0044424//intracellular part;GO:0005575//cellular_component;GO:0005623//cell;GO:0044464//cell part;GO:0005622//intracellular;GO:0005737//cytoplasm	GO:0016740//transferase activity;GO:0003674//molecular_function;GO:0003824//catalytic activity;GO:0016757//transferase activity, transferring glycosyl groups	GO:0006807//nitrogen compound metabolic process;GO:0009987//cellular process;GO:0044699//single-organism process;GO:0044710//single-organism metabolic process;GO:0008150//biological_process;GO:0008152//metabolic process;GO:0034641//cellular nitrogen compound metabolic process;GO:0044281//small molecule metabolic process;GO:0009058//biosynthetic process;GO:0044237//cellular metabolic process
ENSDARG00000003520	84	93	2.86	3.205	0.16430921	0.625637686	0.837669573	no	tbc1d14	TBC1 domain family, member 14 [Source:ZFIN;Acc:ZDB-GENE-030131-6136]	-	-	-	-	GO:0043227//membrane-bounded organelle;GO:0043231//intracellular membrane-bounded organelle;GO:0012505//endomembrane system;GO:0005622//intracellular;GO:0005768//endosome;GO:0031410//cytoplasmic vesicle;GO:0043229//intracellular organelle;GO:0031982//vesicle;GO:0005575//cellular_component;GO:0043226//organelle;GO:0005737//cytoplasm;GO:0005623//cell;GO:0044424//intracellular part;GO:0044464//cell …	GO:0005515//protein binding;GO:0030234//enzyme regulator activity;GO:0019899//enzyme binding;GO:0003674//molecular_function;GO:0098772//molecular function regulator;GO:0005488//binding	GO:0016043//cellular component organization;GO:0009987//cellular process;GO:0016192//vesicle-mediated transport;GO:0051179//localization;GO:0061024//membrane organization;GO:0006914//autophagy;GO:0009056//catabolic process;GO:0044085//cellular component biogenesis;GO:0071840//cellular component organization or biogenesis;GO:0008150//biological_process;GO:0022607//cellular component assembly;GO:00…
ENSDARG00000003523	0	1.5	0.001	0.145	7.17990909	0.297665584	0.536258732	no	itln3	intelectin 3 precursor [Danio rerio]	-	-	-	-	-	-	-
ENSDARG00000003526	765	836	78.195	85.12	0.12242179	0.510168057	0.74955536	no	psma5	proteasome subunit alpha 5 [Source:ZFIN;Acc:ZDB-GENE-040625-96]	Genetic Information Processing	Folding, sorting and degradation	ko03050//Proteasome	K02729	GO:0043231//intracellular membrane-bounded organelle;GO:0005737//cytoplasm;GO:0043234//protein complex;GO:0044464//cell part;GO:0005634//nucleus;GO:0005622//intracellular;GO:0032991//macromolecular complex;GO:0005575//cellular_component;GO:0043229//intracellular organelle;GO:0043226//organelle;GO:0043227//membrane-bounded organelle;GO:0044424//intracellular part;GO:0005623//cell	GO:0008233//peptidase activity;GO:0003674//molecular_function;GO:0016787//hydrolase activity;GO:0003824//catalytic activity	GO:0008150//biological_process;GO:0009056//catabolic process;GO:0008152//metabolic process
ENSDARG00000003527	205.5	561.7	19.37	52.51	1.438768242	9.59E-16	7.83E-14	yes	mak16	MAK16 homolog (S. cerevisiae) [Source:ZFIN;Acc:ZDB-GENE-020419-35]	-	-	-	-	GO:0044422//organelle part;GO:0043232//intracellular non-membrane-bounded organelle;GO:0043229//intracellular organelle;GO:0070013//intracellular organelle lumen;GO:0043233//organelle lumen;GO:0043226//organelle;GO:0005623//cell;GO:0043231//intracellular membrane-bounded organelle;GO:0005730//nucleolus;GO:0044424//intracellular part;GO:0043227//membrane-bounded organelle;GO:0044428//nuclear part;…	-	-
ENSDARG00000003531	768.5	612	46.625	36.98	-0.334358501	0.062140863	0.181610253	no	tcea1	transcription elongation factor A (SII), 1 [Source:ZFIN;Acc:ZDB-GENE-030131-8049]	-	-	-	-	GO:0005634//nucleus;GO:0043229//intracellular organelle;GO:0043227//membrane-bounded organelle;GO:0044464//cell part;GO:0044424//intracellular part;GO:0043231//intracellular membrane-bounded organelle;GO:0005622//intracellular;GO:0005575//cellular_component;GO:0043226//organelle;GO:0005623//cell	GO:1901363//heterocyclic compound binding;GO:0003723//RNA binding;GO:0003676//nucleic acid binding;GO:0008135//translation factor activity, RNA binding;GO:0003674//molecular_function;GO:0005488//binding;GO:0097159//organic cyclic compound binding;GO:0043167//ion binding	GO:0044249//cellular biosynthetic process;GO:0043043//peptide biosynthetic process;GO:0019538//protein metabolic process;GO:0009059//macromolecule biosynthetic process;GO:0044260//cellular macromolecule metabolic process;GO:0044267//cellular protein metabolic process;GO:1901564//organonitrogen compound metabolic process;GO:0009987//cellular process;GO:0043170//macromolecule metabolic process;GO:0…
ENSDARG00000003533	1	5.5	0.045	0.25	2.473931188	0.044894203	0.143049228	no	col8a1b	collagen, type VIII, alpha 1b [Source:ZFIN;Acc:ZDB-GENE-060503-140]	-	-	-	-	GO:0005575//cellular_component;GO:0005576//extracellular region;GO:0032991//macromolecular complex;GO:0043234//protein complex	-	-
ENSDARG00000003544	87.5	112	4.27	5.59	0.388612213	0.156979402	0.350515024	no	adarb1b	adenosine deaminase, RNA-specific, B1b [Source:ZFIN;Acc:ZDB-GENE-030219-15]	-	-	-	-	-	GO:0003674//molecular_function;GO:0097159//organic cyclic compound binding;GO:1901363//heterocyclic compound binding;GO:0005488//binding;GO:0003824//catalytic activity;GO:0003676//nucleic acid binding;GO:0016810//hydrolase activity, acting on carbon-nitrogen (but not peptide) bonds;GO:0003723//RNA binding;GO:0016787//hydrolase activity	GO:0006807//nitrogen compound metabolic process;GO:0008152//metabolic process;GO:0044237//cellular metabolic process;GO:0009987//cellular process;GO:0008150//biological_process;GO:0034641//cellular nitrogen compound metabolic process
ENSDARG00000003553	0	0.5	0.001	0.035	5.129283017	1	1	no	gnrhr2	gonadotropin releasing hormone receptor 2 [Source:ZFIN;Acc:ZDB-GENE-090128-3]	-	-	-	-	GO:0044464//cell part;GO:0071944//cell periphery;GO:0005575//cellular_component;GO:0005886//plasma membrane;GO:0016020//membrane;GO:0005623//cell	GO:0003674//molecular_function;GO:0004871//signal transducer activity	GO:0007154//cell communication;GO:0050794//regulation of cellular process;GO:0044699//single-organism process;GO:0050896//response to stimulus;GO:0044700//single organism signaling;GO:0023052//signaling;GO:0051716//cellular response to stimulus;GO:0065007//biological regulation;GO:0007165//signal transduction;GO:0050789//regulation of biological process;GO:0044763//single-organism cellular proces…
ENSDARG00000003564	162	315.5	15.48	29.885	0.949016071	2.89E-06	4.36E-05	no	dohh	deoxyhypusine hydroxylase/monooxygenase [Source:ZFIN;Acc:ZDB-GENE-030131-451]	-	-	-	-	-	GO:0016491//oxidoreductase activity;GO:0043167//ion binding;GO:0003824//catalytic activity;GO:0005488//binding;GO:0003674//molecular_function	GO:0044260//cellular macromolecule metabolic process;GO:0019538//protein metabolic process;GO:0044237//cellular metabolic process;GO:0009987//cellular process;GO:0071704//organic substance metabolic process;GO:0010467//gene expression;GO:0009058//biosynthetic process;GO:0043170//macromolecule metabolic process;GO:0043412//macromolecule modification;GO:0036211//protein modification process;GO:0044…
ENSDARG00000003570	7192	3832.5	299.285	155.915	-0.940760243	0.060599999	0.178493835	no	hsp90b1	heat shock protein 90, beta (grp94), member 1 [Source:ZFIN;Acc:ZDB-GENE-031002-1]	Genetic Information Processing;Organismal Systems	Immune system;Folding, sorting and degradation	ko04141//Protein processing in endoplasmic reticulum;ko04621//NOD-like receptor signaling pathway	K09487	-	GO:0003674//molecular_function;GO:0005515//protein binding;GO:0043167//ion binding;GO:0005488//binding;GO:0051082//unfolded protein binding	GO:0032502//developmental process;GO:0006457//protein folding;GO:0048856//anatomical structure development;GO:0009987//cellular process;GO:0008150//biological_process;GO:0006950//response to stress;GO:0050896//response to stimulus
ENSDARG00000003573	228	204	25.59	22.675	-0.174477597	0.432857018	0.677298437	no	dctn5	dynactin 5 [Source:ZFIN;Acc:ZDB-GENE-040718-201]	-	-	-	-	GO:0005575//cellular_component	-	-
ENSDARG00000003576	115.5	140.5	4.305	5.19	0.269721301	0.336494573	0.580862673	no	klhl32	kelch-like family member 32 [Source:ZFIN;Acc:ZDB-GENE-070209-47]	-	-	-	-	GO:0044424//intracellular part;GO:0005575//cellular_component;GO:0044464//cell part;GO:0005737//cytoplasm;GO:0005623//cell;GO:0005622//intracellular	GO:0003674//molecular_function	GO:0043412//macromolecule modification;GO:0000003//reproduction;GO:0006464//cellular protein modification process;GO:0044238//primary metabolic process;GO:0030154//cell differentiation;GO:0043170//macromolecule metabolic process;GO:0048869//cellular developmental process;GO:0044699//single-organism process;GO:0009987//cellular process;GO:0008150//biological_process;GO:0044767//single-organism dev…
ENSDARG00000003584	119.5	144.5	5.745	7.955	0.469555038	0.254712727	0.489523754	no	pla2g7	phospholipase A2, group VII (platelet-activating factor acetylhydrolase, plasma) [Source:ZFIN;Acc:ZDB-GENE-040426-2248]	Metabolism	Lipid metabolism	ko00565//Ether lipid metabolism	K01062	-	GO:0003674//molecular_function	GO:0006629//lipid metabolic process;GO:0071704//organic substance metabolic process;GO:0008152//metabolic process;GO:0009056//catabolic process;GO:0044238//primary metabolic process;GO:0044699//single-organism process;GO:0008150//biological_process;GO:0044710//single-organism metabolic process
ENSDARG00000003592	56.5	66.5	5.775	6.745	0.223997497	0.462916067	0.707081099	no	surf1	surfeit 1 [Source:ZFIN;Acc:ZDB-GENE-041108-2]	-	-	-	-	GO:0005622//intracellular;GO:0043227//membrane-bounded organelle;GO:0005739//mitochondrion;GO:0043229//intracellular organelle;GO:0005575//cellular_component;GO:0044424//intracellular part;GO:0044464//cell part;GO:0005623//cell;GO:0005737//cytoplasm;GO:0043231//intracellular membrane-bounded organelle;GO:0044444//cytoplasmic part;GO:0043226//organelle	GO:0022857//transmembrane transporter activity;GO:0016491//oxidoreductase activity;GO:0005215//transporter activity;GO:0003674//molecular_function;GO:0003824//catalytic activity	GO:1902578//single-organism localization;GO:0009790//embryo development;GO:0048869//cellular developmental process;GO:0055085//transmembrane transport;GO:0044763//single-organism cellular process;GO:0032501//multicellular organismal process;GO:0032502//developmental process;GO:0044765//single-organism transport;GO:0030154//cell differentiation;GO:0051234//establishment of localization;GO:0044707/…
ENSDARG00000003599	13834	8902	1169.875	746.45	-0.648236856	0.000361708	0.002987555	no	rpl3	ribosomal protein L3 [Source:ZFIN;Acc:ZDB-GENE-030131-1291]	Genetic Information Processing	Translation	ko03010//Ribosome	K02925	GO:0044424//intracellular part;GO:0044464//cell part;GO:0005829//cytosol;GO:0030529//intracellular ribonucleoprotein complex;GO:0032991//macromolecular complex;GO:0005840//ribosome;GO:0043226//organelle;GO:0043229//intracellular organelle;GO:0005622//intracellular;GO:0043228//non-membrane-bounded organelle;GO:0005575//cellular_component;GO:1990904//ribonucleoprotein complex;GO:0005623//cell;GO:00…	GO:1901363//heterocyclic compound binding;GO:0003735//structural constituent of ribosome;GO:0003723//RNA binding;GO:0097159//organic cyclic compound binding;GO:0003674//molecular_function;GO:0005488//binding;GO:0003676//nucleic acid binding;GO:0005198//structural molecule activity	GO:1901566//organonitrogen compound biosynthetic process;GO:0019538//protein metabolic process;GO:0043933//macromolecular complex subunit organization;GO:0044238//primary metabolic process;GO:0022607//cellular component assembly;GO:0044249//cellular biosynthetic process;GO:1901576//organic substance biosynthetic process;GO:0044267//cellular protein metabolic process;GO:0043604//amide biosynthetic…
ENSDARG00000003607	448	545	27.845	32.42	0.219465798	0.141854288	0.329071545	no	nr2f6a	nuclear receptor subfamily 2, group F, member 6a [Source:ZFIN;Acc:ZDB-GENE-030131-4362]	-	-	-	-	GO:0043227//membrane-bounded organelle;GO:0005622//intracellular;GO:0043229//intracellular organelle;GO:0005575//cellular_component;GO:0005634//nucleus;GO:0043226//organelle;GO:0044464//cell part;GO:0044424//intracellular part;GO:0005623//cell;GO:0043231//intracellular membrane-bounded organelle	GO:0003677//DNA binding;GO:0004871//signal transducer activity;GO:0003700//transcription factor activity, sequence-specific DNA binding;GO:0003674//molecular_function;GO:0043167//ion binding;GO:0097159//organic cyclic compound binding;GO:1901363//heterocyclic compound binding;GO:0005488//binding;GO:0001071//nucleic acid binding transcription factor activity;GO:0003676//nucleic acid binding	GO:0008152//metabolic process;GO:0044700//single organism signaling;GO:0023052//signaling;GO:0006807//nitrogen compound metabolic process;GO:0007154//cell communication;GO:0007165//signal transduction;GO:0044699//single-organism process;GO:0050794//regulation of cellular process;GO:0034641//cellular nitrogen compound metabolic process;GO:0044763//single-organism cellular process;GO:0009987//cellu…
ENSDARG00000003615	2	0.5	0.1	0.03	-1.736965594	0.404568512	0.651211731	no	slc26a3.2	solute carrier family 26 (anion exchanger), member 3, tandem duplicate 2 [Source:ZFIN;Acc:ZDB-GENE-041210-179]	-	-	-	-	GO:0016020//membrane;GO:0005575//cellular_component;GO:0071944//cell periphery;GO:0005623//cell;GO:0044464//cell part;GO:0005886//plasma membrane	GO:0022857//transmembrane transporter activity;GO:0003674//molecular_function;GO:0005215//transporter activity	GO:0008150//biological_process;GO:0044763//single-organism cellular process;GO:0055085//transmembrane transport;GO:0051234//establishment of localization;GO:1902578//single-organism localization;GO:0044699//single-organism process;GO:0065007//biological regulation;GO:0006810//transport;GO:0009987//cellular process;GO:0042592//homeostatic process;GO:0051179//localization;GO:0065008//regulation of …
ENSDARG00000003616	349.5	361.5	16.435	16.89	0.039397872	0.834095123	0.982176014	no	arih1	ariadne ubiquitin-conjugating enzyme E2 binding protein homolog 1 (Drosophila) [Source:ZFIN;Acc:ZDB-GENE-030131-5213]	-	-	-	-	GO:0031981//nuclear lumen;GO:0005634//nucleus;GO:0043226//organelle;GO:0044428//nuclear part;GO:0043233//organelle lumen;GO:0043229//intracellular organelle;GO:0005654//nucleoplasm;GO:0044446//intracellular organelle part;GO:0005737//cytoplasm;GO:0005623//cell;GO:0044464//cell part;GO:0005622//intracellular;GO:0070013//intracellular organelle lumen;GO:0043227//membrane-bounded organelle;GO:003197…	GO:0019899//enzyme binding;GO:0005515//protein binding;GO:0003674//molecular_function;GO:0005488//binding;GO:0043167//ion binding	GO:0036211//protein modification process;GO:0044267//cellular protein metabolic process;GO:0043412//macromolecule modification;GO:0019538//protein metabolic process;GO:0008152//metabolic process;GO:0006464//cellular protein modification process;GO:0044260//cellular macromolecule metabolic process;GO:0043170//macromolecule metabolic process;GO:0071704//organic substance metabolic process;GO:004423…
ENSDARG00000003631	201	186	7.065	6.49	-0.122471082	0.567211479	0.789155781	no	clockb	clock circadian regulator b [Source:ZFIN;Acc:ZDB-GENE-030408-2]	-	-	-	-	GO:0043227//membrane-bounded organelle;GO:0032991//macromolecular complex;GO:0005622//intracellular;GO:0043231//intracellular membrane-bounded organelle;GO:0005623//cell;GO:0005737//cytoplasm;GO:0043229//intracellular organelle;GO:0044464//cell part;GO:0043234//protein complex;GO:0005575//cellular_component;GO:0043226//organelle;GO:0044424//intracellular part;GO:0005634//nucleus	GO:0005488//binding;GO:0003676//nucleic acid binding;GO:0003677//DNA binding;GO:0003700//transcription factor activity, sequence-specific DNA binding;GO:0097159//organic cyclic compound binding;GO:0001071//nucleic acid binding transcription factor activity;GO:0003674//molecular_function;GO:1901363//heterocyclic compound binding	GO:0009987//cellular process;GO:0006807//nitrogen compound metabolic process;GO:0044237//cellular metabolic process;GO:0008150//biological_process;GO:0034641//cellular nitrogen compound metabolic process;GO:0009058//biosynthetic process;GO:0008152//metabolic process
ENSDARG00000003632	7	7	0.565	0.55	-0.038819249	1	1	no	zgc:172270	zgc:172270 [Source:ZFIN;Acc:ZDB-GENE-080204-67]	-	-	-	-	GO:0005737//cytoplasm;GO:0043226//organelle;GO:0005623//cell;GO:0071944//cell periphery;GO:0012505//endomembrane system;GO:0016020//membrane;GO:0005886//plasma membrane;GO:0044444//cytoplasmic part;GO:0043229//intracellular organelle;GO:0005575//cellular_component;GO:0044464//cell part;GO:0043231//intracellular membrane-bounded organelle;GO:0044424//intracellular part;GO:0005794//Golgi apparatus;…	GO:0003674//molecular_function	GO:0044763//single-organism cellular process;GO:0044085//cellular component biogenesis;GO:0044699//single-organism process;GO:0022607//cellular component assembly;GO:0061024//membrane organization;GO:0071840//cellular component organization or biogenesis;GO:0010256//endomembrane system organization;GO:0009987//cellular process;GO:0044802//single-organism membrane organization;GO:0008150//biologic…
ENSDARG00000003635	86.5	135	6.955	10.735	0.626199771	0.020426275	0.078915017	no	mogat3b	monoacylglycerol O-acyltransferase 3b [Source:ZFIN;Acc:ZDB-GENE-110302-2]	-	-	-	-	GO:0005575//cellular_component	GO:0016746//transferase activity, transferring acyl groups;GO:0016740//transferase activity;GO:0003824//catalytic activity;GO:0003674//molecular_function	-
ENSDARG00000003641	1067.5	1242	65.975	76.105	0.206071794	0.254974244	0.489940877	no	tfg	trk-fused gene [Source:ZFIN;Acc:ZDB-GENE-030131-8410]	-	-	-	-	GO:0044424//intracellular part;GO:0044444//cytoplasmic part;GO:0043231//intracellular membrane-bounded organelle;GO:0043229//intracellular organelle;GO:0043227//membrane-bounded organelle;GO:0005575//cellular_component;GO:0012505//endomembrane system;GO:0005622//intracellular;GO:0005794//Golgi apparatus;GO:0005737//cytoplasm;GO:0044464//cell part;GO:0043226//organelle;GO:0005623//cell	GO:0003674//molecular_function	GO:0022607//cellular component assembly;GO:0065003//macromolecular complex assembly;GO:0006810//transport;GO:0006461//protein complex assembly;GO:0051179//localization;GO:0043933//macromolecular complex subunit organization;GO:0070271//protein complex biogenesis;GO:0044085//cellular component biogenesis;GO:0016043//cellular component organization;GO:0016192//vesicle-mediated transport;GO:0009987/…
ENSDARG00000003642	133.5	144.5	11.91	12.81	0.105097062	0.651898714	0.85409787	no	zfyve19	zinc finger, FYVE domain containing 19 [Source:ZFIN;Acc:ZDB-GENE-040718-109]	-	-	-	-	GO:0005575//cellular_component	GO:0043167//ion binding;GO:0005488//binding;GO:0003674//molecular_function	-
ENSDARG00000003655	487	287	19.08	11.2	-0.768562439	2.67E-05	0.000314309	no	tmem59l	transmembrane protein 59-like [Source:ZFIN;Acc:ZDB-GENE-040426-2651]	-	-	-	-	GO:0005575//cellular_component	GO:0003674//molecular_function	GO:0044763//single-organism cellular process;GO:0009653//anatomical structure morphogenesis;GO:0030154//cell differentiation;GO:0032502//developmental process;GO:0016043//cellular component organization;GO:0048856//anatomical structure development;GO:0044699//single-organism process;GO:0071840//cellular component organization or biogenesis;GO:0048869//cellular developmental process;GO:0040007//gr…
ENSDARG00000003675	88.5	100	8.865	10.33	0.220647718	0.642319561	0.84969994	no	cryl1	crystallin, lambda 1 [Source:ZFIN;Acc:ZDB-GENE-060810-7]	Metabolism	Carbohydrate metabolism	ko00040//Pentose and glucuronate interconversions	K13247	GO:0005575//cellular_component	GO:0016491//oxidoreductase activity;GO:0003824//catalytic activity;GO:0003674//molecular_function;GO:0043167//ion binding;GO:0005488//binding	GO:0006629//lipid metabolic process;GO:0044281//small molecule metabolic process;GO:0044238//primary metabolic process;GO:0008150//biological_process;GO:0044710//single-organism metabolic process;GO:0044699//single-organism process;GO:0008152//metabolic process;GO:0071704//organic substance metabolic process
ENSDARG00000003680	678	235.5	24.25	7	-1.79255792	6.01E-16	5.09E-14	yes	runx1t1	runt-related transcription factor 1; translocated to, 1 (cyclin D-related) [Source:ZFIN;Acc:ZDB-GENE-060929-164]	-	-	-	-	GO:0005634//nucleus;GO:0005575//cellular_component;GO:0043227//membrane-bounded organelle;GO:0005622//intracellular;GO:0043226//organelle;GO:0044424//intracellular part;GO:0043229//intracellular organelle;GO:0043231//intracellular membrane-bounded organelle;GO:0005623//cell;GO:0044464//cell part	GO:0043167//ion binding;GO:0000988//transcription factor activity, protein binding;GO:0003674//molecular_function;GO:0003700//transcription factor activity, sequence-specific DNA binding;GO:0005488//binding;GO:0001071//nucleic acid binding transcription factor activity	GO:0034641//cellular nitrogen compound metabolic process;GO:0009058//biosynthetic process;GO:0044237//cellular metabolic process;GO:0009987//cellular process;GO:0008150//biological_process;GO:0008152//metabolic process;GO:0006807//nitrogen compound metabolic process
ENSDARG00000003681	2100	4008	116.215	219.87	0.919854479	9.97E-08	2.08E-06	no	eif5	eukaryotic translation initiation factor 5 [Source:ZFIN;Acc:ZDB-GENE-030131-975]	Genetic Information Processing	Translation	ko03013//RNA transport	K03262	GO:0005575//cellular_component	GO:0003723//RNA binding;GO:0097159//organic cyclic compound binding;GO:0005488//binding;GO:0003674//molecular_function;GO:1901363//heterocyclic compound binding;GO:0003676//nucleic acid binding;GO:0008135//translation factor activity, RNA binding	GO:0006518//peptide metabolic process;GO:0034641//cellular nitrogen compound metabolic process;GO:0009059//macromolecule biosynthetic process;GO:0006807//nitrogen compound metabolic process;GO:0006412//translation;GO:0034645//cellular macromolecule biosynthetic process;GO:0008150//biological_process;GO:0009058//biosynthetic process;GO:0044260//cellular macromolecule metabolic process;GO:0009987//…
ENSDARG00000003684	316.5	474.5	5.775	8.625	0.57870351	0.003700957	0.020432738	no	obsl1a	obscurin-like 1a [Source:ZFIN;Acc:ZDB-GENE-060503-649]	-	-	-	-	GO:0005856//cytoskeleton;GO:0043232//intracellular non-membrane-bounded organelle;GO:0043229//intracellular organelle;GO:0044424//intracellular part;GO:0005622//intracellular;GO:0043234//protein complex;GO:0043228//non-membrane-bounded organelle;GO:0044464//cell part;GO:0005737//cytoplasm;GO:0005623//cell;GO:0043226//organelle;GO:0005575//cellular_component;GO:0032991//macromolecular complex	GO:0003674//molecular_function;GO:0005515//protein binding;GO:0005488//binding;GO:0008092//cytoskeletal protein binding;GO:0005198//structural molecule activity	GO:0048856//anatomical structure development;GO:0070271//protein complex biogenesis;GO:0007010//cytoskeleton organization;GO:0044699//single-organism process;GO:0009653//anatomical structure morphogenesis;GO:0006996//organelle organization;GO:0065003//macromolecular complex assembly;GO:0016043//cellular component organization;GO:0032502//developmental process;GO:0044763//single-organism cellular …
ENSDARG00000003693	1251.5	2249	79.055	140.29	0.827483559	3.12E-06	4.66E-05	no	hars	histidyl-tRNA synthetase [Source:ZFIN;Acc:ZDB-GENE-040912-152]	Genetic Information Processing	Translation	ko00970//Aminoacyl-tRNA biosynthesis	K01892	GO:0005623//cell;GO:0043229//intracellular organelle;GO:0005575//cellular_component;GO:0044424//intracellular part;GO:0044464//cell part;GO:0005737//cytoplasm;GO:0005622//intracellular;GO:0005739//mitochondrion;GO:0044444//cytoplasmic part;GO:0043227//membrane-bounded organelle;GO:0043231//intracellular membrane-bounded organelle;GO:0043226//organelle	GO:0043167//ion binding;GO:0005488//binding;GO:0016874//ligase activity;GO:0003824//catalytic activity;GO:0003674//molecular_function	GO:0009059//macromolecule biosynthetic process;GO:0044281//small molecule metabolic process;GO:0044238//primary metabolic process;GO:0043436//oxoacid metabolic process;GO:0006807//nitrogen compound metabolic process;GO:0090304//nucleic acid metabolic process;GO:0034645//cellular macromolecule biosynthetic process;GO:0019752//carboxylic acid metabolic process;GO:0034641//cellular nitrogen compound…
ENSDARG00000003695	3491.5	2886.5	267.19	218.715	-0.288813846	0.096272751	0.249123523	no	vdac3	voltage-dependent anion channel 3 [Source:ZFIN;Acc:ZDB-GENE-040426-2380]	Environmental Information Processing	Signal transduction	ko04020//Calcium signaling pathway	K15041	GO:0043226//organelle;GO:0043231//intracellular membrane-bounded organelle;GO:0044424//intracellular part;GO:0005575//cellular_component;GO:0044464//cell part;GO:0044444//cytoplasmic part;GO:0005737//cytoplasm;GO:0005739//mitochondrion;GO:0043227//membrane-bounded organelle;GO:0043229//intracellular organelle;GO:0005622//intracellular;GO:0005623//cell	GO:0003674//molecular_function;GO:0005215//transporter activity;GO:0022857//transmembrane transporter activity	GO:0071840//cellular component organization or biogenesis;GO:0006810//transport;GO:0044699//single-organism process;GO:0032502//developmental process;GO:0008150//biological_process;GO:0055085//transmembrane transport;GO:0044085//cellular component biogenesis;GO:0050896//response to stimulus;GO:0051179//localization;GO:0048856//anatomical structure development;GO:0040007//growth;GO:1902578//single…
ENSDARG00000003697	7.5	15.5	0.6	0.795	0.40599236	0.06366261	0.184786666	no	slc5a8l	solute carrier family 5 (iodide transporter), member 8-like [Source:ZFIN;Acc:ZDB-GENE-061110-98]	-	-	-	-	GO:0005575//cellular_component	GO:0022857//transmembrane transporter activity;GO:0005215//transporter activity;GO:0003674//molecular_function	GO:0044765//single-organism transport;GO:0008150//biological_process;GO:0009987//cellular process;GO:0006810//transport;GO:1902578//single-organism localization;GO:0044763//single-organism cellular process;GO:0055085//transmembrane transport;GO:0051179//localization;GO:0051234//establishment of localization;GO:0044699//single-organism process
ENSDARG00000003699	286	327.5	4.16	4.705	0.177611195	0.303364546	0.542117888	no	atp7a	ATPase copper transporting alpha [Source:ZFIN;Acc:ZDB-GENE-060825-45]	-	-	-	-	GO:0005575//cellular_component	GO:0016887//ATPase activity;GO:0003674//molecular_function;GO:0003824//catalytic activity;GO:0016787//hydrolase activity;GO:0017111//nucleoside-triphosphatase activity;GO:0022857//transmembrane transporter activity;GO:0005215//transporter activity;GO:0016462//pyrophosphatase activity;GO:0016817//hydrolase activity, acting on acid anhydrides;GO:0043167//ion binding;GO:0005488//binding;GO:0016818//…	GO:0044765//single-organism transport;GO:0044763//single-organism cellular process;GO:0006810//transport;GO:0051179//localization;GO:1902578//single-organism localization;GO:0009987//cellular process;GO:0051234//establishment of localization;GO:0044699//single-organism process;GO:0055085//transmembrane transport;GO:0008150//biological_process
ENSDARG00000003701	3	6.5	0.545	1.155	1.083564717	0.235129395	0.4642096	no	cldng	claudin g [Source:ZFIN;Acc:ZDB-GENE-010328-7]	Environmental Information Processing;Cellular Processes	Cellular commiunity;Signaling molecules and interaction	ko04530//Tight junction;ko04514//Cell adhesion molecules (CAMs)	K06087	GO:0044464//cell part;GO:0005623//cell;GO:0071944//cell periphery;GO:0016020//membrane;GO:0005886//plasma membrane;GO:0005575//cellular_component	GO:0003674//molecular_function;GO:0005198//structural molecule activity	GO:0007155//cell adhesion;GO:0008150//biological_process;GO:0022610//biological adhesion
ENSDARG00000003705	452.46	360	13.7	10.815	-0.341142228	0.058545221	0.173759026	no	prnprs3	prion protein, related sequence 3 [Source:ZFIN;Acc:ZDB-GENE-041221-3]	-	-	-	-	GO:0016020//membrane;GO:0071944//cell periphery;GO:0005623//cell;GO:0044464//cell part;GO:0005575//cellular_component;GO:0005886//plasma membrane	-	GO:0050789//regulation of biological process;GO:0044763//single-organism cellular process;GO:0009987//cellular process;GO:0022610//biological adhesion;GO:0016265//death;GO:0071822//protein complex subunit organization;GO:0051179//localization;GO:1902578//single-organism localization;GO:0051234//establishment of localization;GO:0008219//cell death;GO:0008150//biological_process;GO:0044085//cellula…
ENSDARG00000003706	34	41	0.2	0.24	0.263034406	0.521656528	0.753647806	no	ryr2b	ryanodine receptor 2b (cardiac) [Source:ZFIN;Acc:ZDB-GENE-061226-3]	-	-	-	-	GO:0005623//cell;GO:0016020//membrane;GO:0005886//plasma membrane;GO:0005575//cellular_component;GO:0044464//cell part;GO:0071944//cell periphery	GO:0022857//transmembrane transporter activity;GO:0043167//ion binding;GO:0003674//molecular_function;GO:0005215//transporter activity;GO:0004871//signal transducer activity;GO:0005488//binding	GO:0051179//localization;GO:0065008//regulation of biological quality;GO:0006810//transport;GO:0055085//transmembrane transport;GO:0044763//single-organism cellular process;GO:0044699//single-organism process;GO:0044765//single-organism transport;GO:0065007//biological regulation;GO:0008150//biological_process;GO:1902578//single-organism localization;GO:0042592//homeostatic process;GO:0051234//es…
ENSDARG00000003732	101	116	7.62	8.265	0.117223822	0.439074864	0.683569418	no	mitfa	microphthalmia-associated transcription factor a [Source:ZFIN;Acc:ZDB-GENE-990910-11]	Organismal Systems	Endocrine system	ko04916//Melanogenesis	K09455	GO:0031981//nuclear lumen;GO:0044422//organelle part;GO:0005575//cellular_component;GO:0031974//membrane-enclosed lumen;GO:0005623//cell;GO:0043229//intracellular organelle;GO:0044424//intracellular part;GO:0044464//cell part;GO:0043231//intracellular membrane-bounded organelle;GO:0044446//intracellular organelle part;GO:0043227//membrane-bounded organelle;GO:0005622//intracellular;GO:0044428//nu…	GO:0003700//transcription factor activity, sequence-specific DNA binding;GO:0001071//nucleic acid binding transcription factor activity;GO:0003674//molecular_function	GO:0009058//biosynthetic process;GO:0044237//cellular metabolic process;GO:0034641//cellular nitrogen compound metabolic process;GO:0044699//single-organism process;GO:0006807//nitrogen compound metabolic process;GO:0009987//cellular process;GO:0048869//cellular developmental process;GO:0044767//single-organism developmental process;GO:0043473//pigmentation;GO:0008152//metabolic process;GO:003015…
ENSDARG00000003749	417	290.5	30.055	20.82	-0.529634951	0.002412786	0.014417023	no	polb	polymerase (DNA directed), beta [Source:ZFIN;Acc:ZDB-GENE-040830-1]	Genetic Information Processing	Replication and repair	ko03410//Base excision repair	K02330	GO:0005623//cell;GO:0043226//organelle;GO:0005634//nucleus;GO:0043229//intracellular organelle;GO:0044464//cell part;GO:0005622//intracellular;GO:0043231//intracellular membrane-bounded organelle;GO:0044424//intracellular part;GO:0043227//membrane-bounded organelle;GO:0005575//cellular_component	GO:0003677//DNA binding;GO:0016740//transferase activity;GO:0097159//organic cyclic compound binding;GO:0003676//nucleic acid binding;GO:1901363//heterocyclic compound binding;GO:0005488//binding;GO:0016779//nucleotidyltransferase activity;GO:0016772//transferase activity, transferring phosphorus-containing groups;GO:0003674//molecular_function;GO:0003824//catalytic activity	GO:0090304//nucleic acid metabolic process;GO:0006950//response to stress;GO:0044260//cellular macromolecule metabolic process;GO:0046483//heterocycle metabolic process;GO:0009987//cellular process;GO:0071704//organic substance metabolic process;GO:0043170//macromolecule metabolic process;GO:0006139//nucleobase-containing compound metabolic process;GO:0044238//primary metabolic process;GO:1901360…
ENSDARG00000003750	855	2132.5	19.085	47.28	1.308790849	1.62E-13	9.55E-12	yes	pfas	phosphoribosylformylglycinamidine synthase [Source:ZFIN;Acc:ZDB-GENE-030131-4420]	Metabolism	Nucleotide metabolism	ko00230//Purine metabolism	K01952	-	GO:0016874//ligase activity;GO:0003824//catalytic activity;GO:0003674//molecular_function	GO:0044699//single-organism process;GO:0044281//small molecule metabolic process;GO:0009987//cellular process;GO:0006807//nitrogen compound metabolic process;GO:0044710//single-organism metabolic process;GO:0009058//biosynthetic process;GO:0008150//biological_process;GO:0008152//metabolic process;GO:0034641//cellular nitrogen compound metabolic process;GO:0044237//cellular metabolic process
ENSDARG00000003751	234.5	227.5	6.88	6.675	-0.043640728	0.792954878	0.953932244	no	lats1	large tumor suppressor kinase 1 [Source:ZFIN;Acc:ZDB-GENE-050523-2]	-	-	-	-	GO:0005623//cell;GO:0044464//cell part;GO:0005575//cellular_component;GO:0005622//intracellular	GO:0016772//transferase activity, transferring phosphorus-containing groups;GO:0003824//catalytic activity;GO:0005488//binding;GO:0016301//kinase activity;GO:0016740//transferase activity;GO:0043167//ion binding;GO:0003674//molecular_function	GO:0044763//single-organism cellular process;GO:0051716//cellular response to stimulus;GO:0065007//biological regulation;GO:0023052//signaling;GO:0050896//response to stimulus;GO:0007165//signal transduction;GO:0009790//embryo development;GO:0007154//cell communication;GO:0043412//macromolecule modification;GO:0044700//single organism signaling;GO:0050789//regulation of biological process;GO:0007…
ENSDARG00000003754	203	142.5	6.81	4.745	-0.521246711	0.009767845	0.044617034	no	tspan2a	tetraspanin 2a [Source:ZFIN;Acc:ZDB-GENE-050522-511]	-	-	-	-	GO:0005575//cellular_component;GO:0071944//cell periphery;GO:0016020//membrane;GO:0044464//cell part;GO:0005623//cell;GO:0005886//plasma membrane	GO:0003674//molecular_function	GO:0009987//cellular process;GO:0050794//regulation of cellular process;GO:0007165//signal transduction;GO:0023052//signaling;GO:0065007//biological regulation;GO:0050789//regulation of biological process;GO:0051716//cellular response to stimulus;GO:0007154//cell communication;GO:0044763//single-organism cellular process;GO:0044699//single-organism process;GO:0008150//biological_process;GO:005089…
ENSDARG00000003757	154.5	152	14.75	14.28	-0.046718975	0.898012384	1	no	cnpy1	canopy1 [Source:ZFIN;Acc:ZDB-GENE-060315-3]	-	-	-	-	GO:0005737//cytoplasm;GO:0044464//cell part;GO:0043231//intracellular membrane-bounded organelle;GO:0005622//intracellular;GO:0043229//intracellular organelle;GO:0044444//cytoplasmic part;GO:0005575//cellular_component;GO:0005783//endoplasmic reticulum;GO:0044424//intracellular part;GO:0043227//membrane-bounded organelle;GO:0005623//cell;GO:0043226//organelle;GO:0012505//endomembrane system	-	GO:0044699//single-organism process;GO:0044707//single-multicellular organism process;GO:0065007//biological regulation;GO:0044763//single-organism cellular process;GO:0048856//anatomical structure development;GO:0051716//cellular response to stimulus;GO:0044767//single-organism developmental process;GO:0008150//biological_process;GO:0009790//embryo development;GO:0044700//single organism signali…
ENSDARG00000003769	135.5	123.5	4.47	4.065	-0.137019479	0.573224128	0.794672686	no	tada2b	transcriptional adaptor 2B [Source:ZFIN;Acc:ZDB-GENE-050522-557]	-	-	-	-	GO:0005623//cell;GO:0043227//membrane-bounded organelle;GO:0043231//intracellular membrane-bounded organelle;GO:0043226//organelle;GO:0044424//intracellular part;GO:0043229//intracellular organelle;GO:0005622//intracellular;GO:0044464//cell part;GO:0005634//nucleus;GO:0005575//cellular_component	GO:0043167//ion binding;GO:0005488//binding;GO:0003677//DNA binding;GO:0000988//transcription factor activity, protein binding;GO:0097159//organic cyclic compound binding;GO:0003676//nucleic acid binding;GO:1901363//heterocyclic compound binding;GO:0003674//molecular_function	GO:0044238//primary metabolic process;GO:0009987//cellular process;GO:0009058//biosynthetic process;GO:0043170//macromolecule metabolic process;GO:0044267//cellular protein metabolic process;GO:0034641//cellular nitrogen compound metabolic process;GO:0016043//cellular component organization;GO:0071704//organic substance metabolic process;GO:0051276//chromosome organization;GO:0006807//nitrogen co…
ENSDARG00000003776	343.5	317.5	8.6	7.865	-0.128889894	0.489974296	0.73216934	no	pip4k2aa	phosphatidylinositol-5-phosphate 4-kinase, type II, alpha a [Source:ZFIN;Acc:ZDB-GENE-080721-18]	Environmental Information Processing;Metabolism;Cellular Processes	Signal transduction;Cell motility;Carbohydrate metabolism	ko04810//Regulation of actin cytoskeleton;ko04070//Phosphatidylinositol signaling system;ko00562//Inositol phosphate metabolism	K00920	GO:0005575//cellular_component	GO:0003824//catalytic activity;GO:0016772//transferase activity, transferring phosphorus-containing groups;GO:0016301//kinase activity;GO:0005488//binding;GO:0016740//transferase activity;GO:0043167//ion binding;GO:0003674//molecular_function	GO:0032502//developmental process;GO:0008152//metabolic process;GO:0008150//biological_process;GO:0044238//primary metabolic process;GO:0071704//organic substance metabolic process;GO:0044699//single-organism process;GO:0006629//lipid metabolic process;GO:0048856//anatomical structure development;GO:0044710//single-organism metabolic process
ENSDARG00000003779	674.5	436.5	29.725	18.98	-0.647196818	0.000495515	0.003903051	no	ctnnd2b	catenin (cadherin-associated protein), delta 2b [Source:ZFIN;Acc:ZDB-GENE-070912-532]	-	-	-	-	-	-	GO:0044699//single-organism process;GO:0006928//movement of cell or subcellular component;GO:0048856//anatomical structure development;GO:0048869//cellular developmental process;GO:0044767//single-organism developmental process;GO:0044763//single-organism cellular process;GO:0009987//cellular process;GO:0048870//cell motility;GO:0032502//developmental process;GO:0051179//localization;GO:0008150//…
ENSDARG00000003789	850.5	919.5	26.1	29.72	0.187384309	0.558793835	0.781466724	no	dennd5b	DENN/MADD domain containing 5B [Source:ZFIN;Acc:ZDB-GENE-030131-2248]	-	-	-	-	GO:0005575//cellular_component	GO:0003674//molecular_function;GO:0005488//binding;GO:0022857//transmembrane transporter activity;GO:0005515//protein binding;GO:0005215//transporter activity;GO:0019899//enzyme binding	GO:0051234//establishment of localization;GO:0009987//cellular process;GO:0055085//transmembrane transport;GO:0008150//biological_process;GO:0051179//localization;GO:1902578//single-organism localization;GO:0044763//single-organism cellular process;GO:0006810//transport;GO:0044699//single-organism process;GO:0044765//single-organism transport
ENSDARG00000003795	2124	1739	251.38	204.035	-0.30105322	0.119475485	0.29104629	no	idh2	isocitrate dehydrogenase 2 (NADP+), mitochondrial [Source:ZFIN;Acc:ZDB-GENE-031118-95]	-	-	-	-	-	GO:0003674//molecular_function;GO:0005488//binding;GO:0016491//oxidoreductase activity;GO:0043167//ion binding;GO:0003824//catalytic activity	GO:0008150//biological_process;GO:0006091//generation of precursor metabolites and energy;GO:0009987//cellular process;GO:0044237//cellular metabolic process;GO:0044281//small molecule metabolic process;GO:0044699//single-organism process;GO:0008152//metabolic process;GO:0044710//single-organism metabolic process
ENSDARG00000003797	124	132.5	3.42	3.58	0.065963262	0.714875245	0.901154406	no	asb2a.1	ankyrin repeat and SOCS box containing 2a, tandem duplicate 1 [Source:ZFIN;Acc:ZDB-GENE-030131-5355]	-	-	-	-	GO:0005575//cellular_component;GO:0044464//cell part;GO:0005622//intracellular;GO:0005623//cell	-	GO:0044267//cellular protein metabolic process;GO:0050789//regulation of biological process;GO:0019538//protein metabolic process;GO:0044699//single-organism process;GO:0007165//signal transduction;GO:0044700//single organism signaling;GO:0036211//protein modification process;GO:0050896//response to stimulus;GO:0043412//macromolecule modification;GO:0008152//metabolic process;GO:0044237//cellular…
ENSDARG00000003803	55	6.5	5.29	0.615	-3.104609407	4.62E-09	1.26E-07	yes	LHX3	LIM homeobox 3 [Source:HGNC Symbol;Acc:HGNC:6595]	-	-	-	-	GO:0043231//intracellular membrane-bounded organelle;GO:0005634//nucleus;GO:0043229//intracellular organelle;GO:0043226//organelle;GO:0005622//intracellular;GO:0043227//membrane-bounded organelle;GO:0044424//intracellular part;GO:0044464//cell part;GO:0005623//cell;GO:0005575//cellular_component	GO:0003676//nucleic acid binding;GO:0005488//binding;GO:0043167//ion binding;GO:0003674//molecular_function;GO:0003677//DNA binding;GO:0097159//organic cyclic compound binding;GO:1901363//heterocyclic compound binding	-
ENSDARG00000003808	1310	1160.5	83.675	73.46	-0.18783775	0.361537652	0.608530035	no	aqp3a	aquaporin 3a [Source:ZFIN;Acc:ZDB-GENE-040426-2826]	-	-	-	-	GO:0005575//cellular_component	GO:0003674//molecular_function;GO:0005215//transporter activity;GO:0022857//transmembrane transporter activity	GO:0008150//biological_process;GO:0055085//transmembrane transport;GO:0044699//single-organism process;GO:0051179//localization;GO:1902578//single-organism localization;GO:0044763//single-organism cellular process;GO:0044765//single-organism transport;GO:0006810//transport;GO:0051234//establishment of localization;GO:0009987//cellular process
ENSDARG00000003811	948.85	1643.345	20.22	35.03	0.792807991	1.51E-05	0.000191802	no	plxnb2a	plexin b2a [Source:ZFIN;Acc:ZDB-GENE-030131-8917]	-	-	-	-	GO:0005575//cellular_component	GO:0004871//signal transducer activity;GO:0003674//molecular_function	GO:0000902//cell morphogenesis;GO:0023052//signaling;GO:0044700//single organism signaling;GO:0044699//single-organism process;GO:0050789//regulation of biological process;GO:0044763//single-organism cellular process;GO:0065007//biological regulation;GO:0008150//biological_process;GO:0048646//anatomical structure formation involved in morphogenesis;GO:0009987//cellular process;GO:0071840//cellula…
ENSDARG00000003818	242.5	325	8.225	10.93	0.410205817	0.024827777	0.091882796	no	prkag1	protein kinase, AMP-activated, gamma 1 non-catalytic subunit [Source:ZFIN;Acc:ZDB-GENE-040426-2188]	Environmental Information Processing;Organismal Systems	Endocrine system;Signal transduction	ko04068//FoxO signaling pathway;ko04910//Insulin signaling pathway;ko04920//Adipocytokine signaling pathway	K07200	GO:0005575//cellular_component	GO:0016772//transferase activity, transferring phosphorus-containing groups;GO:0003824//catalytic activity;GO:0016740//transferase activity;GO:0003674//molecular_function;GO:0016301//kinase activity	GO:0008150//biological_process
ENSDARG00000003820	23	30	0.76	1.045	0.459431619	0.408738106	0.654146323	no	nr1d2a	nuclear receptor subfamily 1, group D, member 2a [Source:ZFIN;Acc:ZDB-GENE-040504-1]	-	-	-	-	GO:0005634//nucleus;GO:0044464//cell part;GO:0005622//intracellular;GO:0043231//intracellular membrane-bounded organelle;GO:0005623//cell;GO:0043226//organelle;GO:0043229//intracellular organelle;GO:0005575//cellular_component;GO:0043227//membrane-bounded organelle;GO:0044424//intracellular part	GO:0003674//molecular_function;GO:0003677//DNA binding;GO:1901363//heterocyclic compound binding;GO:0003700//transcription factor activity, sequence-specific DNA binding;GO:0001071//nucleic acid binding transcription factor activity;GO:0005488//binding;GO:0003676//nucleic acid binding;GO:0043167//ion binding;GO:0004871//signal transducer activity;GO:0097159//organic cyclic compound binding	GO:0051716//cellular response to stimulus;GO:0009987//cellular process;GO:0007165//signal transduction;GO:0007154//cell communication;GO:0065007//biological regulation;GO:0050789//regulation of biological process;GO:0008150//biological_process;GO:0044237//cellular metabolic process;GO:0050896//response to stimulus;GO:0023052//signaling;GO:0044700//single organism signaling;GO:0009058//biosyntheti…
ENSDARG00000003822	54.5	53.5	4.67	4.56	-0.034388726	0.964841632	1	no	ankrd16	ankyrin repeat domain 16 [Source:ZFIN;Acc:ZDB-GENE-041210-253]	-	-	-	-	GO:0005575//cellular_component	GO:0003674//molecular_function	GO:0008150//biological_process
ENSDARG00000003827	95	129.5	5.41	7.325	0.437200165	0.056578036	0.169409244	no	snapc1b	small nuclear RNA activating complex, polypeptide 1b [Source:ZFIN;Acc:ZDB-GENE-040426-716]	-	-	-	-	GO:0043229//intracellular organelle;GO:0043234//protein complex;GO:0043231//intracellular membrane-bounded organelle;GO:0005622//intracellular;GO:0005623//cell;GO:0044424//intracellular part;GO:0043226//organelle;GO:0005575//cellular_component;GO:0032991//macromolecular complex;GO:0005634//nucleus;GO:0044464//cell part;GO:0043227//membrane-bounded organelle	GO:0003676//nucleic acid binding;GO:1901363//heterocyclic compound binding;GO:0097159//organic cyclic compound binding;GO:0003674//molecular_function;GO:0003677//DNA binding;GO:0005488//binding	GO:0006807//nitrogen compound metabolic process;GO:0009987//cellular process;GO:0044237//cellular metabolic process;GO:0034641//cellular nitrogen compound metabolic process;GO:0009058//biosynthetic process;GO:0008150//biological_process;GO:0008152//metabolic process
ENSDARG00000003829	439.5	519.5	12.37	14.53	0.232189203	0.198368486	0.411682789	no	galnt2	UDP-N-acetyl-alpha-D-galactosamine:polypeptide N-acetylgalactosaminyltransferase 2 [Source:ZFIN;Acc:ZDB-GENE-041111-110]	Metabolism	Glycan biosynthesis and metabolism	ko00512//Mucin type O-glycan biosynthesis	K00710	GO:0043229//intracellular organelle;GO:0005794//Golgi apparatus;GO:0005622//intracellular;GO:0005737//cytoplasm;GO:0005623//cell;GO:0043231//intracellular membrane-bounded organelle;GO:0005575//cellular_component;GO:0044424//intracellular part;GO:0012505//endomembrane system;GO:0044464//cell part;GO:0043226//organelle;GO:0043227//membrane-bounded organelle;GO:0044444//cytoplasmic part	GO:0016757//transferase activity, transferring glycosyl groups;GO:0003674//molecular_function;GO:0003824//catalytic activity;GO:0016740//transferase activity	GO:0036211//protein modification process;GO:0009058//biosynthetic process;GO:0009987//cellular process;GO:0071704//organic substance metabolic process;GO:0006464//cellular protein modification process;GO:0044267//cellular protein metabolic process;GO:0043412//macromolecule modification;GO:0044238//primary metabolic process;GO:0008150//biological_process;GO:0008152//metabolic process;GO:0005975//c…
ENSDARG00000003835	578	836	21.73	31.425	0.53222457	0.003019989	0.01733208	no	stom	stomatin [Source:ZFIN;Acc:ZDB-GENE-980526-486]	-	-	-	-	GO:0005886//plasma membrane;GO:0044464//cell part;GO:0016020//membrane;GO:0005575//cellular_component;GO:0071944//cell periphery;GO:0005623//cell	GO:0003674//molecular_function	-
ENSDARG00000003841	32	50	1.895	2.94	0.633618307	0.042284521	0.136804614	no	usb1	U6 snRNA biogenesis 1 [Source:ZFIN;Acc:ZDB-GENE-040801-197]	-	-	-	-	GO:0005622//intracellular;GO:0043229//intracellular organelle;GO:0044424//intracellular part;GO:0043231//intracellular membrane-bounded organelle;GO:0043227//membrane-bounded organelle;GO:0044464//cell part;GO:0005575//cellular_component;GO:0005634//nucleus;GO:0005623//cell;GO:0043226//organelle	GO:0004518//nuclease activity;GO:0016788//hydrolase activity, acting on ester bonds;GO:0003824//catalytic activity;GO:0016787//hydrolase activity;GO:0003674//molecular_function	GO:0030154//cell differentiation;GO:0048869//cellular developmental process;GO:0006807//nitrogen compound metabolic process;GO:0008152//metabolic process;GO:0002376//immune system process;GO:0044699//single-organism process;GO:0048856//anatomical structure development;GO:0044767//single-organism developmental process;GO:0044237//cellular metabolic process;GO:0009987//cellular process;GO:0032502//…
ENSDARG00000003845	282	223	12.725	9.975	-0.35127691	0.071421714	0.201273794	no	chm	choroideremia (Rab escort protein 1) [Source:ZFIN;Acc:ZDB-GENE-030318-2]	-	-	-	-	GO:0005575//cellular_component;GO:0005623//cell;GO:0044464//cell part;GO:0005737//cytoplasm;GO:0005622//intracellular;GO:0044424//intracellular part	GO:0098772//molecular function regulator;GO:0016740//transferase activity;GO:0003674//molecular_function;GO:0003824//catalytic activity;GO:0016765//transferase activity, transferring alkyl or aryl (other than methyl) groups;GO:0030234//enzyme regulator activity	GO:0065008//regulation of biological quality;GO:0048646//anatomical structure formation involved in morphogenesis;GO:0019538//protein metabolic process;GO:0051716//cellular response to stimulus;GO:0009653//anatomical structure morphogenesis;GO:0044237//cellular metabolic process;GO:0008152//metabolic process;GO:0051234//establishment of localization;GO:0007154//cell communication;GO:0065007//biol…
ENSDARG00000003846	113.5	196.5	16.61	28.465	0.777137026	0.000469357	0.003721281	no	mrpl21	mitochondrial ribosomal protein L21 [Source:ZFIN;Acc:ZDB-GENE-061027-183]	Genetic Information Processing	Translation	ko03010//Ribosome	K02888	GO:0005575//cellular_component;GO:0044464//cell part;GO:0005622//intracellular;GO:1990904//ribonucleoprotein complex;GO:0043232//intracellular non-membrane-bounded organelle;GO:0005840//ribosome;GO:0030529//intracellular ribonucleoprotein complex;GO:0005737//cytoplasm;GO:0043226//organelle;GO:0044444//cytoplasmic part;GO:0005623//cell;GO:0044424//intracellular part;GO:0043229//intracellular organ…	-	-
ENSDARG00000003854	513	579	18.935	20.88	0.141066291	0.563946623	0.785942375	no	acsl1b	acyl-CoA synthetase long chain family member 1b [Source:ZFIN;Acc:ZDB-GENE-040801-88]	Organismal Systems;Metabolism;Cellular Processes	Lipid metabolism;Endocrine system;Transport and catabolism;Global and Overview	ko04146//Peroxisome;ko04920//Adipocytokine signaling pathway;ko03320//PPAR signaling pathway;ko01212//Fatty acid metabolism;ko00071//Fatty acid degradation;ko00061//Fatty acid biosynthesis	K01897	GO:0005575//cellular_component	GO:0003674//molecular_function	GO:0008150//biological_process
ENSDARG00000003860	1315	1151	149.725	129.855	-0.205413567	0.245145857	0.477519256	no	cbx3a	chromobox homolog 3a (HP1 gamma homolog, Drosophila) [Source:ZFIN;Acc:ZDB-GENE-030131-1158]	-	-	-	-	GO:0043232//intracellular non-membrane-bounded organelle;GO:0044446//intracellular organelle part;GO:0031974//membrane-enclosed lumen;GO:0043226//organelle;GO:0005623//cell;GO:0005622//intracellular;GO:0005694//chromosome;GO:0005575//cellular_component;GO:0043229//intracellular organelle;GO:0031981//nuclear lumen;GO:0070013//intracellular organelle lumen;GO:0043227//membrane-bounded organelle;GO:…	-	GO:0009058//biosynthetic process;GO:0009987//cellular process;GO:0044237//cellular metabolic process;GO:0006807//nitrogen compound metabolic process;GO:0008150//biological_process;GO:0008152//metabolic process;GO:0034641//cellular nitrogen compound metabolic process
ENSDARG00000003865	24.5	42	2.47	4.22	0.772731957	0.026544304	0.096522831	no	pard6b	par-6 partitioning defective 6 homolog beta (C. elegans) [Source:ZFIN;Acc:ZDB-GENE-090312-133]	Cellular Processes	Cellular commiunity;Transport and catabolism	ko04144//Endocytosis;ko04530//Tight junction	K06093	GO:0005575//cellular_component;GO:0044464//cell part;GO:0071944//cell periphery;GO:0005886//plasma membrane;GO:0005623//cell;GO:0016020//membrane	-	GO:0044763//single-organism cellular process;GO:0034330//cell junction organization;GO:0009987//cellular process;GO:0008150//biological_process;GO:0022607//cellular component assembly;GO:0071840//cellular component organization or biogenesis;GO:0044699//single-organism process;GO:0044085//cellular component biogenesis;GO:0016043//cellular component organization
ENSDARG00000003866	1060	1063	40.15	40.005	-0.005219662	0.979447935	1	no	tm9sf2	transmembrane 9 superfamily member 2 [Source:ZFIN;Acc:ZDB-GENE-030131-6302]	-	-	-	-	GO:0005575//cellular_component	-	-
ENSDARG00000003867	14	11	1.245	0.98	-0.345292088	0.555353466	0.77871014	no	cdk20	cyclin-dependent kinase 20 [Source:ZFIN;Acc:ZDB-GENE-041212-84]	-	-	-	-	GO:0032991//macromolecular complex;GO:0031981//nuclear lumen;GO:0005622//intracellular;GO:0044422//organelle part;GO:0043234//protein complex;GO:0031974//membrane-enclosed lumen;GO:0005929//cilium;GO:0005654//nucleoplasm;GO:0005623//cell;GO:0043226//organelle;GO:0044464//cell part;GO:0005737//cytoplasm;GO:0044428//nuclear part;GO:0043227//membrane-bounded organelle;GO:0043233//organelle lumen;GO:…	GO:0003674//molecular_function;GO:0043167//ion binding;GO:0098772//molecular function regulator;GO:0005488//binding;GO:0016740//transferase activity;GO:0003824//catalytic activity;GO:0030234//enzyme regulator activity;GO:0016772//transferase activity, transferring phosphorus-containing groups;GO:0016301//kinase activity	GO:0044260//cellular macromolecule metabolic process;GO:0044085//cellular component biogenesis;GO:0008152//metabolic process;GO:0043412//macromolecule modification;GO:0044267//cellular protein metabolic process;GO:0044238//primary metabolic process;GO:0043170//macromolecule metabolic process;GO:0008150//biological_process;GO:0032502//developmental process;GO:0048856//anatomical structure developm…
ENSDARG00000003869	165	134.5	12.37	10.015	-0.304683079	0.163774298	0.360702752	no	decr1	2,4-dienoyl-CoA reductase, mitochondrial [Danio rerio]	-	-	-	-	-	-	-
ENSDARG00000003872	426	377.5	15.59	13.725	-0.183814779	0.290679988	0.530389846	no	ccdc102a	coiled-coil domain containing 102A [Source:ZFIN;Acc:ZDB-GENE-030131-4044]	-	-	-	-	GO:0044464//cell part;GO:0005575//cellular_component;GO:0005622//intracellular;GO:0044424//intracellular part;GO:0032991//macromolecular complex;GO:0043228//non-membrane-bounded organelle;GO:0043226//organelle;GO:0005856//cytoskeleton;GO:0043232//intracellular non-membrane-bounded organelle;GO:0005623//cell;GO:0043234//protein complex;GO:0043229//intracellular organelle	GO:0003674//molecular_function	-
ENSDARG00000003877	173.51	93	3.86	1.915	-1.011256455	0.000734588	0.005435383	yes	pbrm1	polybromo 1 [Source:ZFIN;Acc:ZDB-GENE-080926-4]	-	-	-	-	GO:0005634//nucleus;GO:0032991//macromolecular complex;GO:0005575//cellular_component;GO:0043226//organelle;GO:0031981//nuclear lumen;GO:0000228//nuclear chromosome;GO:0031974//membrane-enclosed lumen;GO:0043233//organelle lumen;GO:0043234//protein complex;GO:0043227//membrane-bounded organelle;GO:0044464//cell part;GO:0005623//cell;GO:0044428//nuclear part;GO:0043232//intracellular non-membrane-…	GO:0097159//organic cyclic compound binding;GO:1901363//heterocyclic compound binding;GO:0003677//DNA binding;GO:0003674//molecular_function;GO:0003676//nucleic acid binding;GO:0005488//binding	GO:0071840//cellular component organization or biogenesis;GO:0051276//chromosome organization;GO:0016043//cellular component organization;GO:0008150//biological_process;GO:0006996//organelle organization;GO:0009987//cellular process
ENSDARG00000003899	19	24.5	1.295	1.655	0.353879119	0.385416029	0.632211237	no	zdhhc23b	zinc finger, DHHC-type containing 23b [Source:ZFIN;Acc:ZDB-GENE-040808-13]	-	-	-	-	GO:0005575//cellular_component	GO:0016740//transferase activity;GO:0003824//catalytic activity;GO:0016746//transferase activity, transferring acyl groups;GO:0003674//molecular_function	-
ENSDARG00000003900	2.5	7.5	0.115	0.33	1.520832163	0.065921976	0.189395797	no	gpr61l	si:dkeyp-111e5.4 [Source:ZFIN;Acc:ZDB-GENE-131127-443]	-	-	-	-	GO:0005575//cellular_component	GO:0004871//signal transducer activity;GO:0003674//molecular_function	GO:0050896//response to stimulus;GO:0051716//cellular response to stimulus;GO:0050789//regulation of biological process;GO:0023052//signaling;GO:0044699//single-organism process;GO:0050794//regulation of cellular process;GO:0007165//signal transduction;GO:0065007//biological regulation;GO:0044763//single-organism cellular process;GO:0044700//single organism signaling;GO:0009987//cellular process;…
ENSDARG00000003902	5.5	3	0.595	0.29	-1.036836768	0.385603439	0.63229264	no	ctsl.1	cathepsin L.1 [Source:ZFIN;Acc:ZDB-GENE-040718-61]	-	-	-	-	GO:0044444//cytoplasmic part;GO:0005615//extracellular space;GO:0043226//organelle;GO:0005576//extracellular region;GO:0044424//intracellular part;GO:0043231//intracellular membrane-bounded organelle;GO:0005773//vacuole;GO:0005575//cellular_component;GO:0005622//intracellular;GO:0043229//intracellular organelle;GO:0044421//extracellular region part;GO:0005764//lysosome;GO:0000323//lytic vacuole;G…	GO:0003674//molecular_function;GO:0008233//peptidase activity;GO:0003824//catalytic activity;GO:0016787//hydrolase activity	GO:0008152//metabolic process;GO:0008150//biological_process;GO:0009056//catabolic process
ENSDARG00000003903	0.5	0	0.055	0.001	-5.781359714	1	1	no	hapln2	hyaluronan and proteoglycan link protein 2 [Source:ZFIN;Acc:ZDB-GENE-030131-8089]	-	-	-	-	GO:0005578//proteinaceous extracellular matrix;GO:0044421//extracellular region part;GO:0005575//cellular_component;GO:0005576//extracellular region;GO:0031012//extracellular matrix	GO:0043167//ion binding;GO:0003674//molecular_function;GO:0005488//binding;GO:0005198//structural molecule activity	GO:0048856//anatomical structure development;GO:0008150//biological_process;GO:0007155//cell adhesion;GO:0032502//developmental process;GO:0022610//biological adhesion
ENSDARG00000003904	14.5	18.5	0.485	0.615	0.342601663	0.505570546	0.745401433	no	sycp1	synaptonemal complex protein 1 [Source:ZFIN;Acc:ZDB-GENE-040910-6]	-	-	-	-	GO:0043226//organelle;GO:0005623//cell;GO:0043228//non-membrane-bounded organelle;GO:0044464//cell part;GO:0005575//cellular_component;GO:0070013//intracellular organelle lumen;GO:0044424//intracellular part;GO:0044446//intracellular organelle part;GO:0043229//intracellular organelle;GO:0005622//intracellular;GO:0043233//organelle lumen;GO:0031974//membrane-enclosed lumen;GO:0044428//nuclear part…	-	GO:0008150//biological_process;GO:0000003//reproduction;GO:0006996//organelle organization;GO:0009987//cellular process;GO:0044085//cellular component biogenesis;GO:0016043//cellular component organization;GO:0051276//chromosome organization;GO:0022607//cellular component assembly;GO:0007049//cell cycle;GO:0071840//cellular component organization or biogenesis;GO:0044699//single-organism process;…
ENSDARG00000003909	0	1	0.001	0.06	5.906890596	0.525665465	0.753647806	no	ftr01	finTRIM family, member 1 [Source:ZFIN;Acc:ZDB-GENE-070705-491]	-	-	-	-	GO:0005575//cellular_component;GO:0044464//cell part;GO:0005623//cell;GO:0005622//intracellular	GO:0003674//molecular_function;GO:0043167//ion binding;GO:0005488//binding	-
ENSDARG00000003910	797.5	653.5	11.88	9.685	-0.294710882	0.14702911	0.336081185	no	med13b	mediator complex subunit 13b [Source:ZFIN;Acc:ZDB-GENE-030131-3529]	-	-	-	-	GO:0005622//intracellular;GO:0043229//intracellular organelle;GO:0070013//intracellular organelle lumen;GO:0031974//membrane-enclosed lumen;GO:0044424//intracellular part;GO:0043234//protein complex;GO:0044464//cell part;GO:0044428//nuclear part;GO:0044422//organelle part;GO:0044446//intracellular organelle part;GO:0043233//organelle lumen;GO:0043231//intracellular membrane-bounded organelle;GO:0…	GO:0000988//transcription factor activity, protein binding;GO:0003674//molecular_function	GO:0034641//cellular nitrogen compound metabolic process;GO:0008150//biological_process;GO:0044237//cellular metabolic process;GO:0009987//cellular process;GO:0009058//biosynthetic process;GO:0006807//nitrogen compound metabolic process;GO:0008152//metabolic process
ENSDARG00000003920	4315.5	6102.335	267.62	375.735	0.489529574	0.005180121	0.026734403	no	setb	SET nuclear proto-oncogene b [Source:ZFIN;Acc:ZDB-GENE-030131-433]	-	-	-	-	GO:0044424//intracellular part;GO:0044464//cell part;GO:0043231//intracellular membrane-bounded organelle;GO:0043227//membrane-bounded organelle;GO:0043229//intracellular organelle;GO:0043226//organelle;GO:0005622//intracellular;GO:0005623//cell;GO:0005634//nucleus;GO:0005575//cellular_component	-	GO:0044085//cellular component biogenesis;GO:0022607//cellular component assembly;GO:0065003//macromolecular complex assembly;GO:0051276//chromosome organization;GO:0016043//cellular component organization;GO:0006996//organelle organization;GO:0048856//anatomical structure development;GO:0008150//biological_process;GO:0043933//macromolecular complex subunit organization;GO:0071840//cellular compo…
ENSDARG00000003925	8.5	14	1.17	1.945	0.733261625	0.266091561	0.503211974	no	cx28.6	connexin 28.6 [Source:ZFIN;Acc:ZDB-GENE-040406-4]	-	-	-	-	GO:0044464//cell part;GO:0005886//plasma membrane;GO:0043234//protein complex;GO:0005575//cellular_component;GO:0005623//cell;GO:0071944//cell periphery;GO:0016020//membrane;GO:0032991//macromolecular complex	GO:0003674//molecular_function	GO:0008150//biological_process
ENSDARG00000003927	444	418	14.485	13.52	-0.099464533	0.580274385	0.801299697	no	cldn12	claudin 12 [Source:ZFIN;Acc:ZDB-GENE-010328-14]	-	-	-	-	GO:0005575//cellular_component	-	-
ENSDARG00000003931	352	261.5	19.015	14.055	-0.436054485	0.056890777	0.170114134	no	cndp2	carnosine dipeptidase 2 [Source:ZFIN;Acc:ZDB-GENE-030131-5499]	Metabolism	Amino acid metabolism;Metabolism of other amino acids	ko00330//Arginine and proline metabolism;ko00410//beta-Alanine metabolism;ko00340//Histidine metabolism	K08660	GO:0005575//cellular_component	GO:0016787//hydrolase activity;GO:0003674//molecular_function;GO:0003824//catalytic activity;GO:0008233//peptidase activity	GO:0008150//biological_process
ENSDARG00000003934	23.5	21.5	2.82	2.565	-0.136736337	0.80245573	0.960727718	no	nxnl2	nucleoredoxin like 2 [Source:ZFIN;Acc:ZDB-GENE-041212-55]	-	-	-	-	GO:0005575//cellular_component;GO:0005623//cell	-	GO:0065008//regulation of biological quality;GO:0042592//homeostatic process;GO:0008150//biological_process;GO:0003008//system process;GO:0032501//multicellular organismal process;GO:0065007//biological regulation;GO:0050877//neurological system process
ENSDARG00000003938	1497.5	1558	71.48	73.695	0.044027105	0.801831605	0.960130789	no	rpa1	replication protein A1 [Source:ZFIN;Acc:ZDB-GENE-030912-3]	Genetic Information Processing	Replication and repair	ko03460//Fanconi anemia pathway;ko03420//Nucleotide excision repair;ko03030//DNA replication;ko03440//Homologous recombination;ko03430//Mismatch repair	K07466	GO:0044464//cell part;GO:0043228//non-membrane-bounded organelle;GO:0043231//intracellular membrane-bounded organelle;GO:0031981//nuclear lumen;GO:0043232//intracellular non-membrane-bounded organelle;GO:0043229//intracellular organelle;GO:0043227//membrane-bounded organelle;GO:0070013//intracellular organelle lumen;GO:0031974//membrane-enclosed lumen;GO:0044446//intracellular organelle part;GO:0…	GO:0003677//DNA binding;GO:0097159//organic cyclic compound binding;GO:0003674//molecular_function;GO:0005488//binding;GO:1901363//heterocyclic compound binding;GO:0003676//nucleic acid binding;GO:0043167//ion binding	GO:0006725//cellular aromatic compound metabolic process;GO:0043170//macromolecule metabolic process;GO:0006950//response to stress;GO:0006139//nucleobase-containing compound metabolic process;GO:0046483//heterocycle metabolic process;GO:0009058//biosynthetic process;GO:0044260//cellular macromolecule metabolic process;GO:0071704//organic substance metabolic process;GO:0044237//cellular metabolic…
ENSDARG00000003940	439.5	499	27.02	32.235	0.254600309	0.344469656	0.589840019	no	mtfr1l	mitochondrial fission regulator 1-like [Source:ZFIN;Acc:ZDB-GENE-030131-6228]	-	-	-	-	GO:0005622//intracellular;GO:0044424//intracellular part;GO:0044444//cytoplasmic part;GO:0005737//cytoplasm;GO:0005575//cellular_component;GO:0043229//intracellular organelle;GO:0043231//intracellular membrane-bounded organelle;GO:0043227//membrane-bounded organelle;GO:0043226//organelle;GO:0005739//mitochondrion;GO:0005623//cell;GO:0044464//cell part	GO:0003674//molecular_function	GO:0044237//cellular metabolic process;GO:0006091//generation of precursor metabolites and energy;GO:0007005//mitochondrion organization;GO:0016043//cellular component organization;GO:0009987//cellular process;GO:0071840//cellular component organization or biogenesis;GO:0008152//metabolic process;GO:0008150//biological_process;GO:0006996//organelle organization
ENSDARG00000003941	311	548	16.895	29.52	0.805096371	8.63E-06	0.000117062	no	rrs1	RRS1 ribosome biogenesis regulator homolog (S. cerevisiae) [Source:ZFIN;Acc:ZDB-GENE-030131-9345]	-	-	-	-	GO:0005575//cellular_component;GO:0043226//organelle;GO:0044428//nuclear part;GO:0005622//intracellular;GO:0043233//organelle lumen;GO:0043227//membrane-bounded organelle;GO:0044464//cell part;GO:0044422//organelle part;GO:0043232//intracellular non-membrane-bounded organelle;GO:0005634//nucleus;GO:0005623//cell;GO:0005730//nucleolus;GO:0031981//nuclear lumen;GO:0044446//intracellular organelle p…	GO:0003674//molecular_function	GO:0008150//biological_process;GO:0071840//cellular component organization or biogenesis;GO:0008152//metabolic process;GO:0051179//localization;GO:0051641//cellular localization;GO:0009987//cellular process;GO:0042254//ribosome biogenesis;GO:0006913//nucleocytoplasmic transport;GO:0006810//transport;GO:0022613//ribonucleoprotein complex biogenesis;GO:0006807//nitrogen compound metabolic process;G…
ENSDARG00000003944	0	0	0.001	0.001	0	1	1	notest	nmur1b	neuromedin U receptor 1b [Source:ZFIN;Acc:ZDB-GENE-131121-154]	-	-	-	-	GO:0005575//cellular_component	GO:0003674//molecular_function;GO:0004871//signal transducer activity	GO:0023052//signaling;GO:0044700//single organism signaling;GO:0050794//regulation of cellular process;GO:0065007//biological regulation;GO:0008150//biological_process;GO:0044763//single-organism cellular process;GO:0009987//cellular process;GO:0007154//cell communication;GO:0050896//response to stimulus;GO:0044699//single-organism process;GO:0007165//signal transduction;GO:0050789//regulation of…
ENSDARG00000003952	3733	3969	195.41	185.615	-0.074190995	0.692130139	0.884601767	no	pfn2	profilin 2 [Source:ZFIN;Acc:ZDB-GENE-040115-4]	Cellular Processes	Cell motility	ko04810//Regulation of actin cytoskeleton	K05759	-	GO:0005515//protein binding;GO:0008092//cytoskeletal protein binding;GO:0005488//binding;GO:0003674//molecular_function	GO:0006996//organelle organization;GO:0008150//biological_process;GO:0006461//protein complex assembly;GO:0071822//protein complex subunit organization;GO:0009987//cellular process;GO:0022607//cellular component assembly;GO:0043933//macromolecular complex subunit organization;GO:0016043//cellular component organization;GO:0071840//cellular component organization or biogenesis;GO:0070271//protein …
ENSDARG00000003961	111.5	403.5	5.245	18.89	1.848608024	3.51E-20	5.03E-18	yes	parp3	poly (ADP-ribose) polymerase family, member 3 [Source:ZFIN;Acc:ZDB-GENE-030131-7435]	Genetic Information Processing	Replication and repair	ko03410//Base excision repair	K10798	GO:0044464//cell part;GO:0044424//intracellular part;GO:0005737//cytoplasm;GO:0005623//cell;GO:0005622//intracellular;GO:0005575//cellular_component	GO:0016874//ligase activity;GO:0016757//transferase activity, transferring glycosyl groups;GO:0016740//transferase activity;GO:0003824//catalytic activity;GO:0003674//molecular_function	GO:0008150//biological_process;GO:0019538//protein metabolic process;GO:0009790//embryo development;GO:0044260//cellular macromolecule metabolic process;GO:0044267//cellular protein metabolic process;GO:0032502//developmental process;GO:0009987//cellular process;GO:0006807//nitrogen compound metabolic process;GO:0044707//single-multicellular organism process;GO:0044767//single-organism developmen…
[truncated: 25,266 more rows]
